# Supplementary material for: Metal and additive-free synthesis of 2,4-disubstituted oxazoles via thiourea-mediated cyclization reaction
Source: Royal Society of Chemistry journal article supplement (doi:10.1039/d5cc07183f), 2026-01-01

# Supporting Information

## Metal and additive-free synthesis of 2,4-disubstituted oxazoles via thiourea-mediated cyclization reaction

Huifeng Wang<sup>a,b#</sup>, Wenjing Ma<sup>a,b#</sup>, Lei Deng<sup>a</sup>, Genting Huang,<sup>b</sup> Sisi Gong,<sup>b</sup> Xiuling Chen<sup>a\*\*</sup>,  
Shi-Yong Liu<sup>a\*</sup>

<sup>a</sup>School of Chemical Engineering, Guangdong University of Petrochemical Technology, Maoming, 525000, China

<sup>b</sup>School of Pharmacy, Hubei University of Science and Technology, Xianning, 437100, China

### Contents

|                                                                                       |       |
|---------------------------------------------------------------------------------------|-------|
| 1. General remarks                                                                    | 2     |
| 2. General experimental procedure for the synthesis of 2,4-disubstituted oxazoles and | 2     |
| 3. The synthesis of raw materials                                                     | 2     |
| 4. The reaction mechanism                                                             | 3     |
| 5. <sup>1</sup> H NMR, <sup>13</sup> C NMR and LC-MS data of products                 | 4-15  |
| 6. Reference                                                                          | 16    |
| 7. Copies of <sup>1</sup> H and <sup>13</sup> C NMR spectra                           | 17-48 |

## 1. General remarks

All non-aqueous reactions and manipulations were performed in N<sub>2</sub> atmosphere. The reactions were monitored by GC and LC-MS. The <sup>1</sup>H NMR and <sup>13</sup>C NMR spectra were recorded on a Bruker ADVANCE III spectrometer at 400 MHz and 100 MHz, respectively, and chemical shifts were reported in parts per million (ppm). Flash column chromatography was performed using silica gel 300-400 μm. LC-MS results were recorded on LC-MS JINDAO804, and GC analysis was performed on GC 7820A. Carboxylic acid compounds, substituted 2-bromo-benzyl ketones were purchased from Energy Chemical, dried by standard methods before using.

**HRMS:** Thermal Orbitrap Exploris 120

Ion Source Type = H-ESI

Spray Voltage: Positive Ion (V) = 3500

## 2. General experimental procedure for the synthesis of 2,4-disubstituted oxazoles

A 25 ml Schlenk-type tube equipped with a magnetic stir bar was charged with substrate **1a-1z4** (0.2 mmol), thiourea **2a** (0.24 mmol), base (0.2 mmol). The reaction tube was evacuated and back-filled with N<sub>2</sub>. 1,4-dioxane (2 mL) were added at room temperature under N<sub>2</sub> atmosphere, then the reaction mixture was stirred at 150 °C for 12 h. The reaction was monitored by GC or LC-MS. After completion of the reaction, the resulting solution was cooled to room temperature, and neutralized with saturated solution of NaCl. The product was extracted with EtOAc, dried over anhydrous Na<sub>2</sub>SO<sub>4</sub> and concentrated in vacuo. The crude product was purified by flash column chromatography on silica gel to give analytically pure product.

## 3. The synthesis of raw materials

A 500 mL three-neck flask equipped with a magnetic stir bar was charged with substrate 2-bromobenzoylacetone (100 mmol), acetic acid (150 mmol), K<sub>2</sub>CO<sub>3</sub> (200

mmol), and 1,4-dioxane (300 mL) at room temperature. The reaction mixture was stirred at 25 °C for 48 h and monitored by GC or LC-MS. Upon completion, the mixture was neutralized with a saturated NaCl solution. The product was extracted with EtOAc, dried over anhydrous Na<sub>2</sub>SO<sub>4</sub>, and concentrated under reduced pressure. The crude product, obtained in pure form, was used directly in the next step without further purification. Other substrates were prepared following an analogous procedure.

#### 4. The reaction mechanism

When radical scavengers such as 2,2,6,6-tetramethylpiperidinyloxy (TEMPO, 2 equiv) or butylated hydroxytoluene (BHT, 2 equiv) were added to the reaction mixture, the desired product 3a was still obtained in 88% yield. This result suggests that a radical pathway is unlikely to be involved in this transformation.

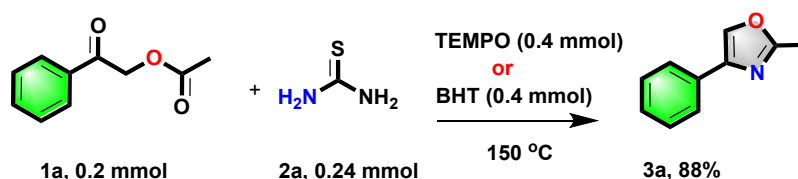

To demonstrate that the reaction follows the proposed mechanism, SC(NH<sub>2</sub>)<sub>2</sub> is initially heated, decomposing into NH<sub>3</sub> and SCN<sup>-</sup>. The presence of SCN<sup>-</sup> ions in the system is confirmed using Fe<sup>3+</sup> ions. After completion of the reaction, when the mixture is added dropwise to a FeCl<sub>3</sub> solution, the yellow solution immediately turns red.

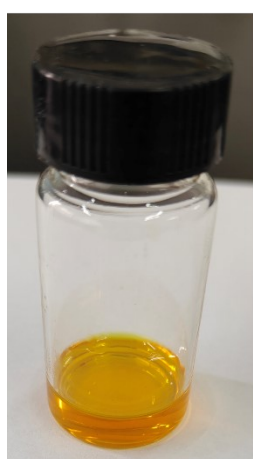

FeCl<sub>3</sub> solution

add the reaction solution

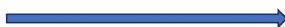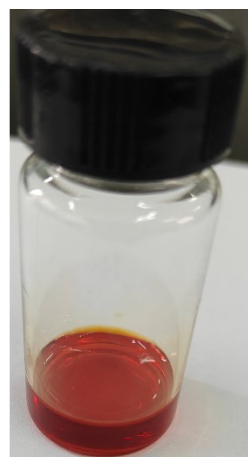

FeCl<sub>3</sub> solution + reaction mixture

## 5. <sup>1</sup>H NMR, <sup>13</sup>C NMR and LC-MS data of products

### 2-Methyl-4-phenyloxazole (3a)<sup>1</sup>

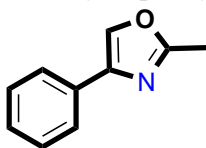

Following the general procedure (EtOAc/Petroleum ether 1:25), 3a was obtained as pale-yellow solid, isolated yield: 92%, m.p. 68-70°C. <sup>1</sup>H NMR (400 MHz, CDCl<sub>3</sub>): δ 7.79 (s, 1H), 7.71 (d, *J* = 7.2 Hz, 2H), 7.38 (t, *J* = 7.6 Hz, 2H), 7.28 (d, *J* = 7.6 Hz, 1H), 2.50 (s, 3H); <sup>13</sup>C NMR (100 MHz, CDCl<sub>3</sub>): δ 161.8, 140.7, 133.1, 131.2, 128.7, 127.9, 125.4, 14.0. *m/z* = 159.07, LC-MS spectrum (+): *m/z* = 160.05.

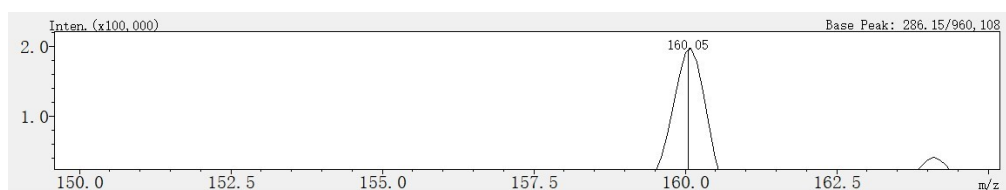

### 2-Ethyl-4-phenyloxazole (3b)<sup>2</sup>

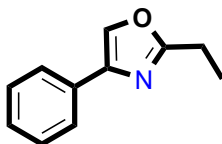

Following the general procedure (EtOAc/Petroleum ether 1:25), 3b was obtained as yellow oil liquid, isolated yield: 90%. <sup>1</sup>H NMR (400 MHz, CDCl<sub>3</sub>): δ 7.78 (s, 1H), 7.72 (d, *J* = 7.2 Hz, 2H), 7.37 (t, *J* = 7.6 Hz, 2H), 7.29 (d, *J* = 7.4 Hz, 1H), 2.83 (q, *J* = 7.6 Hz 2H), 1.36 (t, *J* = 7.6 Hz, 3H); <sup>13</sup>C NMR (100 MHz, CDCl<sub>3</sub>): δ 166.1, 140.5, 132.9, 131.3, 128.6, 127.8, 125.4, 21.7, 11.1. LC-MS: *m/z* = 207.11.6. *m/z* = 173.08, LC-MS spectrum (+): *m/z* = 174.10.

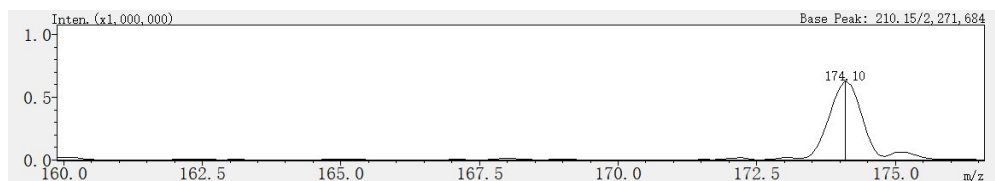

### 2-Isopropyl-4-phenyloxazole (3c)<sup>2</sup>

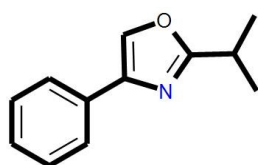

Following the general procedure (EtOAc/Petroleum ether 1:25), 3c was obtained as yellow oil liquid, isolated yield: 89%. <sup>1</sup>H NMR (400 MHz, CDCl<sub>3</sub>): δ 7.79 (s, 1H), 7.73 (d, *J* = 6.8 Hz, 2H), 7.38 (t, *J* = 7.6 Hz, 2H), 7.28 (t, *J* = 7.4 Hz, 1H), 3.19-3.09 (m, 1H), 1.39 (d, *J* = 7.2 Hz, 6H); <sup>13</sup>C NMR (100 MHz, CDCl<sub>3</sub>) δ 169.3, 140.4, 132.8, 131.4, 128.7, 127.8, 125.5, 28.6, 20.5. *m/z* = 187.10, LC-MS spectrum (+): *m/z* = 188.15.

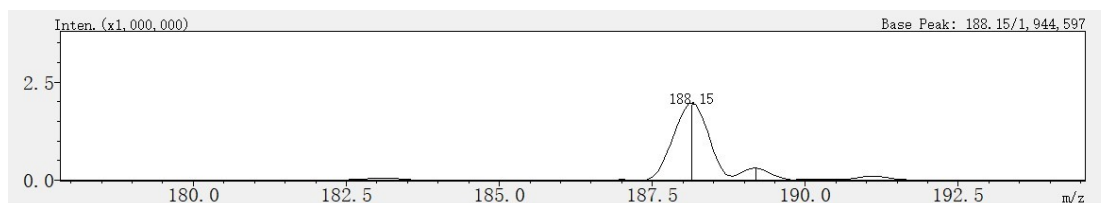

### 2-(Tert-butyl)-4-phenyloxazole (3d)<sup>2</sup>

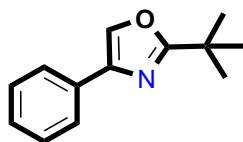

Following the general procedure (EtOAc/Petroleum ether 1:25), 3d was obtained as yellow oil liquid, isolated yield: 91%, m.p. <sup>1</sup>H NMR (400 MHz, CDCl<sub>3</sub>): δ 7.77 (s, 1H), 7.73 (d, *J* = 6.8 Hz, 2H), 7.37 (t, *J* = 7.4 Hz, 2H), 7.27 (t, *J* = 7.4 Hz, 1H), 1.42 (s, 9H); <sup>13</sup>C NMR (100 MHz, CDCl<sub>3</sub>) δ 171.5, 140.3, 132.8, 131.6, 128.6, 127.7, 125.6, 33.8, 28.6. *m/z* = 201.12, LC-MS spectrum (+): *m/z* = 202.15.

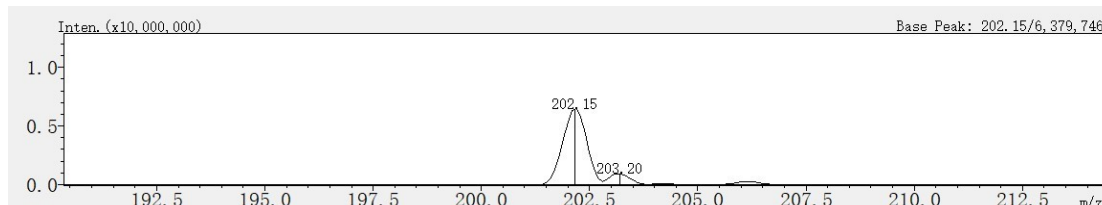

### 2-(Methoxymethyl)-4-phenyloxazole (3e)

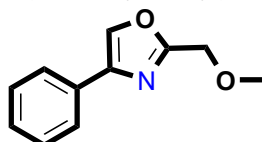

Following the general procedure (EtOAc/Petroleum ether 1:25), 3e was

obtained as light yellow semi-solid, isolated yield: 84%.  $^1\text{H}$  NMR (400 MHz,  $\text{CDCl}_3$ ):  $\delta$  7.90 (s, 1H), 7.74 (d,  $J = 7.2$  Hz, 2H), 7.39 (t,  $J = 7.4$  Hz, 2H), 7.30 (t,  $J = 7.2$  Hz, 1H), 4.57 (s, 2H), 3.46 (s, 3H);  $^{13}\text{C}$  NMR (100 MHz,  $\text{CDCl}_3$ )  $\delta$  161.0, 140.9, 134.1, 130.8, 128.7, 128.1, 125.5, 66.4, 58.8.  $m/z = 189.08$ , LC-MS spectrum (+):  $m/z = 190.15$ , HRMS (ESI+): Calculated for  $\text{C}_{11}\text{H}_{11}\text{NO}_2$   $[\text{M}+\text{H}]^+$ : 190.0868, Found  $[\text{M}+\text{H}]^+$ : 190.0872.

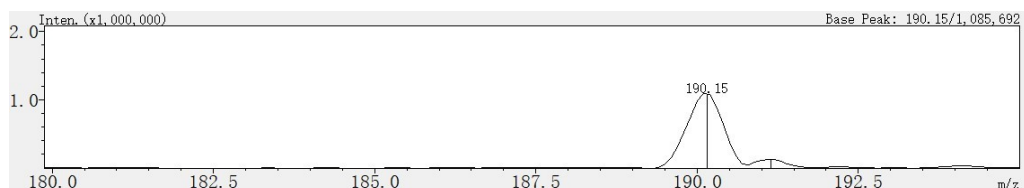

### 2,4-Diphenyloxazole (3f)<sup>2</sup>

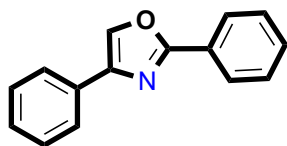

Following the general procedure (EtOAc/Petroleum ether 1:25), 3f was obtained as a yellow solid, isolated yield: 90%, m.p. 72-75 °C.  $^1\text{H}$  NMR (400 MHz,  $\text{CDCl}_3$ ):  $\delta$  8.13 (d,  $J = 8.0$  Hz, 2H), 7.95 (s, 1H), 7.81 (t,  $J = 6.8$  Hz, 2H), 7.47-7.40 (m, 5H), 7.32 (t,  $J = 7.4$  Hz, 1H);  $^{13}\text{C}$  NMR (100 MHz,  $\text{CDCl}_3$ )  $\delta$  162.0, 142.1, 133.4, 131.2, 130.4, 128.8, 128.1, 127.6, 126.5, 125.7.  $m/z = 221.08$ , LC-MS spectrum (+):  $m/z = 222.10$ .

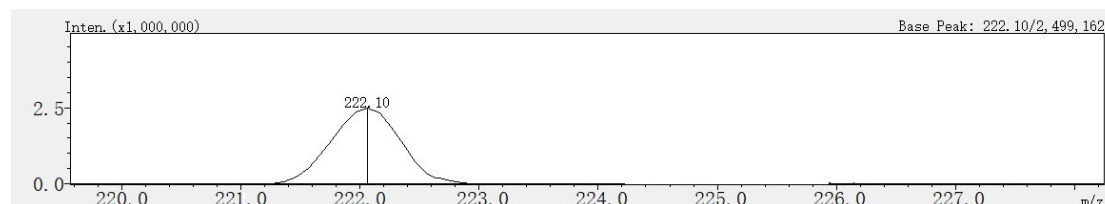

### 4-Phenyl-2-(p-tolyl)oxazole (3g)<sup>1</sup>

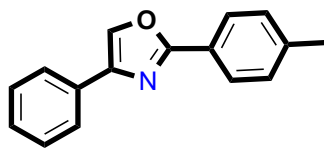

Following the general procedure (EtOAc/Petroleum ether 1:25), 3g was obtained as a yellow solid, isolated yield: 89%, m.p. 110-112 °C.  $^1\text{H}$  NMR (400 MHz,  $\text{CDCl}_3$ ):  $\delta$  8.01 (d,  $J = 8.0$  Hz, 2H), 7.92 (s, 1H), 7.82 (d,  $J = 7.2$  Hz, 2H), 7.42 (t,  $J = 7.6$  Hz, 2H), 7.32 (t,  $J = 7.4$  Hz, 1H), 7.28 (d,  $J = 8.0$  Hz, 2H), 2.40 (s, 3H);  $^{13}\text{C}$  NMR (100 MHz,  $\text{CDCl}_3$ )  $\delta$  162.2, 141.9, 140.7, 133.1, 131.3, 129.5, 128.7, 128.1, 126.5, 126.7, 125.7, 124.9, 21.6.  $m/z = 235.10$ , LC-MS spectrum (+):  $m/z = 236.15$ .

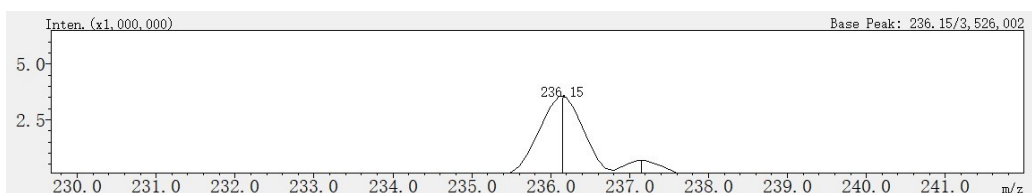

### 2-(4-Nitrophenyl)-4-phenyloxazole (3h)<sup>1</sup>

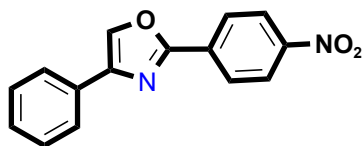

Following the general procedure (EtOAc/Petroleum ether 1:20), 3h was obtained as a yellow solid, isolated yield: 87%, m.p. 130-132 °C. <sup>1</sup>H NMR (400 MHz, CDCl<sub>3</sub>): δ 8.36 (q, *J* = 8.8 Hz, 4H), 8.05 (s, 1H), 7.84 (d, *J* = 8.4 Hz, 2H), 7.46 (t, *J* = 7.2 Hz, 2H), 7.37 (t, *J* = 7.4 Hz, 1H); <sup>13</sup>C NMR (100 MHz, CDCl<sub>3</sub>): δ 159.8, 148.8, 143.1, 134.8, 132.9, 130.5, 128.9, 128.7, 127.3, 125.8, 124.2. *m/z* = 266.07, LC-MS spectrum (+): *m/z* = 267.

### 2-Benzyl-4-phenyloxazole (3i)<sup>2</sup>

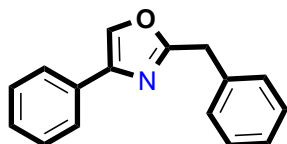

Following the general procedure (EtOAc/Petroleum ether 1:25), 3i was obtained as a yellow solid, isolated yield: 86%, m.p. 94-96 °C. <sup>1</sup>H NMR (400 MHz, CDCl<sub>3</sub>): δ 7.79 (s, 1H), 7.72 (d, *J* = 8.0 Hz, 2H), 7.40-7.23 (m, 8H), 4.17 (s, 2H); <sup>13</sup>C NMR (100 MHz, CDCl<sub>3</sub>): <sup>13</sup>C NMR (100 MHz, CDCl<sub>3</sub>) δ 163.3, 140.8, 135.5, 133.7, 131.7, 128.8, 128.7, 128.0, 127.1, 125.6, 34.8. *m/z* = 235.10, LC-MS spectrum (+): *m/z* = 236.15.

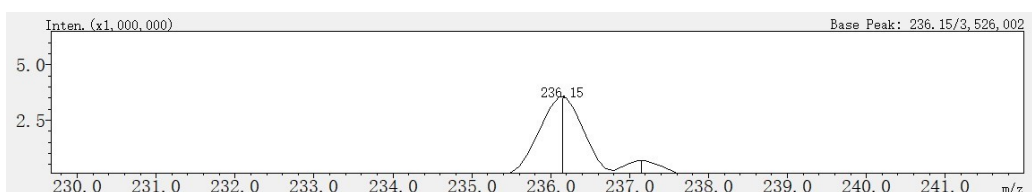

### 2-(4-Methylbenzyl)-4-phenyloxazole (3j)<sup>4</sup>

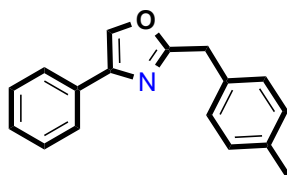

Following the general procedure (EtOAc/Petroleum ether 1:25), 3j was obtained as a yellow solid, isolated yield: 88%, m.p. 90-92 °C. <sup>1</sup>H NMR (400 MHz, CDCl<sub>3</sub>): δ 7.77 (s, 1H), 7.69 (d, *J* = 7.2 Hz, 2H), 7.37 (t, *J* = 7.6 Hz, 2H), 7.27 (t, *J* = 7.4 Hz, 1H), 7.20 (d, *J* = 8.0 Hz, 2H), 7.11 (d, *J* = 7.6 Hz, 2H), 4.12 (s, 2H), 2.31 (s, 3H); <sup>13</sup>C NMR (100 MHz, CDCl<sub>3</sub>) δ 163.5, 140.8, 136.7,

133.7, 132.4, 131.2, 129.4, 128.69, 128.68, 127.9 125.5, 34.4, 21.0. LC-MS:  $m/z$  = 249.12. LC-MS spectrum (+):  $m/z$  = 250.15.

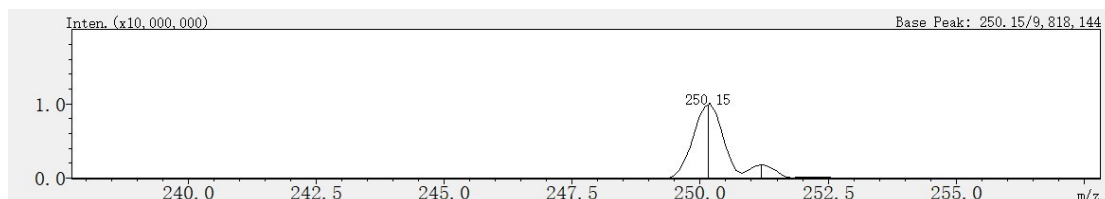

### 2-(4-Chlorobenzyl)-4-phenyloxazole (3k)<sup>4</sup>

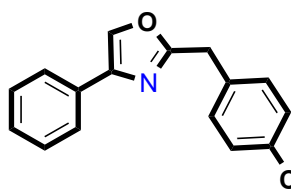

Following the general procedure (EtOAc/Petroleum ether 1:25), 3k was obtained as light yellow semi-solid, isolated yield: 90%. <sup>1</sup>H NMR (400 MHz, CDCl<sub>3</sub>):  $\delta$  7.81 (s, 1H), 7.72 (d,  $J$  = 7.2 Hz, 2H), 7.39 (t,  $J$  = 7.4 Hz, 2H), 7.31-7.25(m, 5H), 4.13 (s, 2H); <sup>13</sup>C NMR (100 MHz, CDCl<sub>3</sub>)  $\delta$  162.7, 140.9, 133.9, 133.8, 131.0, 128.9, 128.8, 128.1, 125.5, 34.1. LC-MS:  $m/z$  = 207.11.6.  $m/z$  = 269.06, LC-MS spectrum (+):  $m/z$  = 270.15.

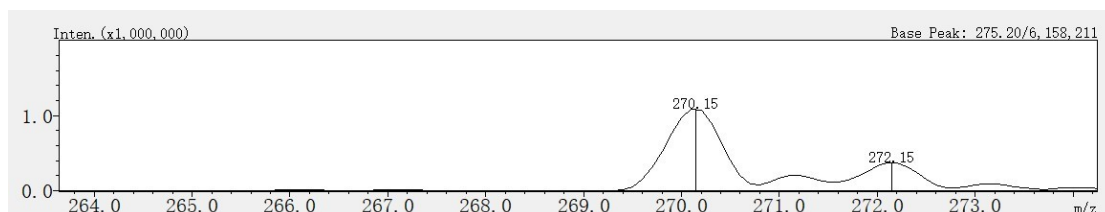

### 2-(4-Nitrobenzyl)-4-phenyloxazole (3l)<sup>4</sup>

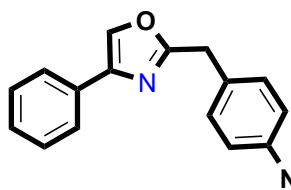

Following the general procedure (EtOAc/Petroleum ether 1:20), 3l was obtained as yellow solid, isolated yield: 89%, m.p. 123-125 °C. <sup>1</sup>H NMR (400 MHz, CDCl<sub>3</sub>):  $\delta$  8.19 (d,  $J$  = 8.8 Hz, 2H), 7.85 (s, 1H), 7.72 (d,  $J$  = 7.2 Hz, 2H), 7.51 (d,  $J$  = 8.8 Hz, 2H), 7.39 (t,  $J$  = 7.4 Hz, 2H), 7.30 (t,  $J$  = 7.4 Hz, 1H), 4.26 (s, 3H); <sup>13</sup>C NMR (100 MHz, CDCl<sub>3</sub>)  $\delta$  161.6, 147.2, 142.8, 141.2, 134.0, 130.8, 129.8, 128.8, 128.2, 125.5, 123.9, 34.5.  $m/z$  = 280.08, LC-MS spectrum (+):  $m/z$  = 281.15.

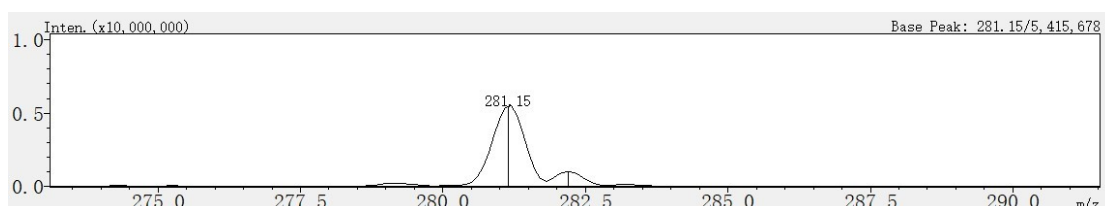



#### 4-((4-Phenyloxazol-2-yl)methyl)phenol (3m)

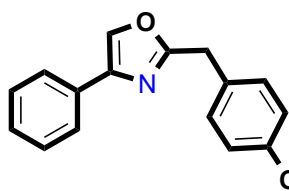

Following the general procedure (EtOAc/Petroleum ether 1:15), 3m was obtained as yellow solid, isolated yield: 86%, m.p. 133-135 °C.  $^1\text{H}$  NMR (400 MHz, DMSO- $d_6$ ):  $\delta$  9.37 (s, 1H), 8.45 (s, 1H), 7.76 (d,  $J = 7.2$  Hz, 2H), 7.40 (t,  $J = 7.6$  Hz, 2H), 7.30 (t,  $J = 7.2$  Hz, 1H), 7.13 (d,  $J = 8.4$  Hz, 2H), 6.74 (d,  $J = 8.4$  Hz, 2H), 4.05 (s, 2H);  $^{13}\text{C}$  NMR (100 MHz, DMSO- $d_6$ )  $\delta$  164.2, 156.7, 140.2, 135.4, 131.4, 130.2, 129.2, 128.3, 126.3, 125.6, 115.9, 33.4.  $m/z = 251.09$ , LC-MS spectrum (+):  $m/z = 252.15$ , HRMS (ESI+): calculated for  $\text{C}_{16}\text{H}_{13}\text{NO}_2$   $[\text{M}+\text{H}]^+$ : 252.1024, Found  $[\text{M}+\text{H}]^+$ : 252.1016.

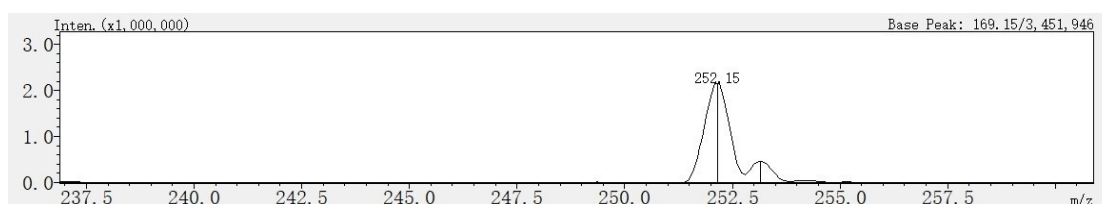

#### 2-(naphthalen-1-ylmethyl)-4-phenyloxazole (3n)

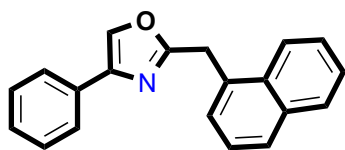

Following the general procedure (EtOAc/Petroleum ether 1:25), 3n was obtained as yellow oil liquid, isolated yield: 90%.  $^1\text{H}$  NMR (400 MHz,  $\text{CDCl}_3$ ):  $\delta$  7.82-7.77 (m, 5H), 7.72 (d,  $J = 6.8$  Hz, 2H), 7.47-7.45 (m, 3H), 7.44 (t,  $J = 7.6$  Hz, 2H), 7.37 (t,  $J = 5.6$  Hz, 1H), 4.33 (s, 2H);  $^{13}\text{C}$  NMR (100 MHz,  $\text{CDCl}_3$ )  $\delta$  163.3, 140.9, 133.8, 133.5, 132.9, 132.5, 131.1, 128.8, 128.5, 128.0, 127.7, 127.5, 126.9, 126.3, 125.9, 125.6, 35.0.  $m/z = 285.12$ , LC-MS spectrum (+):  $m/z = 286.20$ , HRMS (ESI+): calculated for  $\text{C}_{20}\text{H}_{15}\text{NO}$   $[\text{M}+\text{H}]^+$ : 286.1232, Found  $[\text{M}+\text{H}]^+$ : 286.1224.

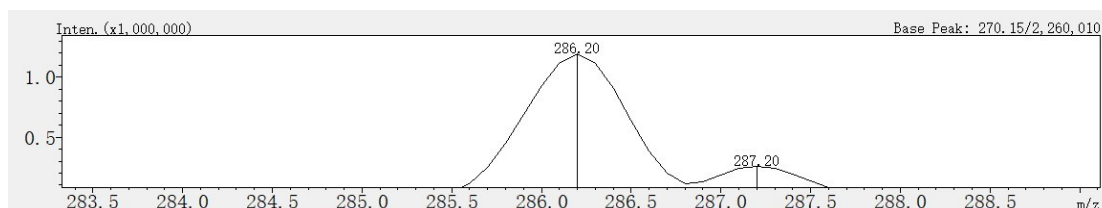

#### 2-((3a,7a-Dihydro-1H-indol-3-yl)methyl)-4-phenyloxazole (3o)

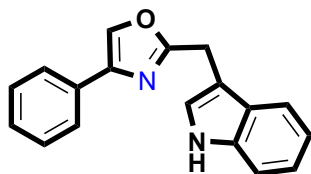

Following the general procedure (EtOAc/Petroleum ether 1:20), 3o was

obtained as yellow oil liquid, isolated yield: 86.  $^1\text{H}$  NMR (400 MHz,  $\text{CDCl}_3$ ):  $\delta$  8.36 (s, 1H), 7.77 (s, 1H), 7.71 (d,  $J = 7.2$  Hz, 2H), 7.66 (d,  $J = 7.6$  Hz, 2H), 7.36 (t,  $J = 7.2$  Hz, 2H), 7.29 (d,  $J = 7.2$  Hz, 1H), 7.18-7.09 (m, 4H), 7.05 (s, 1H), 4.29 (s, 2H);  $^{13}\text{C}$  NMR (100 MHz,  $\text{CDCl}_3$ )  $\delta$  164.0, 140.6, 136.2, 133.54, 131.1, 128.7, 127.9, 125.5, 123.0, 122.2, 119.6, 118.9, 111.3, 109.6, 25.0  $m/z = 274.11$ , LC-MS spectrum (+):  $m/z = 275.20$ , HRMS (ESI+): calculated for  $\text{C}_{18}\text{H}_{14}\text{N}_2\text{O}$   $[\text{M}+\text{H}]^+$ : 275.1184, Found  $[\text{M}+\text{H}]^+$ : 275.1176.

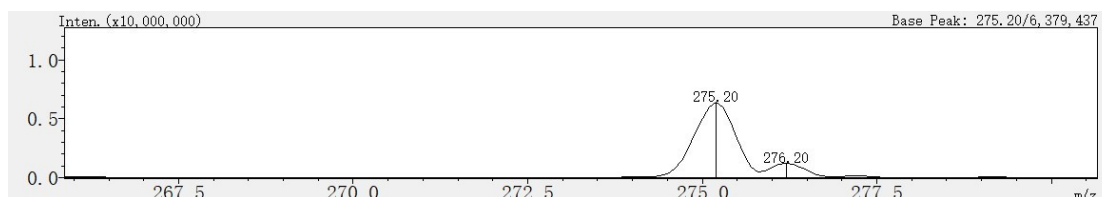

### (E)-4-Phenyl-2-styryloxazole (3p)

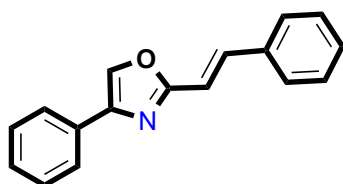

Following the general procedure (EtOAc/Petroleum ether 1:25), 3p was obtained as yellow solid, isolated yield: 88%, m.p. 128-129 °C.  $^1\text{H}$  NMR (400 MHz,  $\text{CDCl}_3$ ):  $\delta$  7.86 (s, 1H), 7.77 (d,  $J = 7.6$  Hz, 2H), 7.54-7.52 (m, 3H), 7.43-7.31 (m, 6H), 7.02 (d,  $J = 16.4$  Hz, 1H);  $^{13}\text{C}$  NMR (100 MHz,  $\text{CDCl}_3$ )  $\delta$  161.8, 136.4, 135.5, 133.2, 131.0, 129.2, 128.9, 128.8, 128.2, 127.2, 125.6, 113.9.  $m/z = 247.10$ , LC-MS spectrum (+):  $m/z = 248.15$ , HRMS (ESI+): calculated for  $\text{C}_{17}\text{H}_{13}\text{NO}$   $[\text{M}+\text{H}]^+$ : 248.1075, Found  $[\text{M}+\text{H}]^+$ : 248.1069.

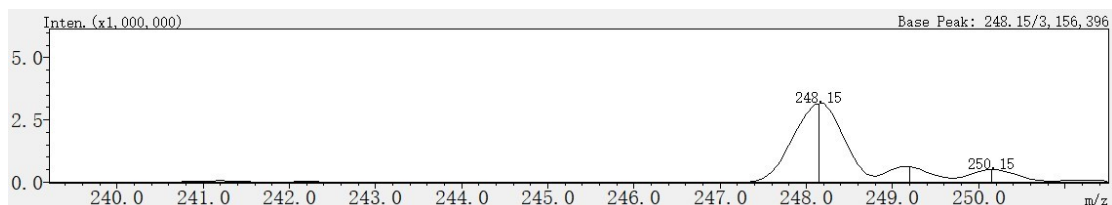

### 2-Methyl-4-(p-tolyl) oxazole (3q)<sup>1</sup>

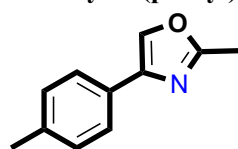

Following the general procedure (EtOAc/Petroleum ether 1:25), 3q was obtained as light yellow semi-solid, isolated yield: 90.  $^1\text{H}$  NMR (400 MHz,  $\text{CDCl}_3$ ):  $\delta$  7.75 (s, 1H), 7.60 (d,  $J = 8.4$  Hz, 2H), 7.20 (d,  $J = 7.6$  Hz, 2H), 2.50 (s, 3H), 2.35 (s, 3H);  $^{13}\text{C}$  NMR (100 MHz,  $\text{CDCl}_3$ ):  $\delta$  161.7, 140.7, 137.7, 132.7, 129.4, 128.4, 125.3, 21.3, 14.0.  $m/z = 173.08$ , LC-MS spectrum (+):  $m/z = 174.10$ .

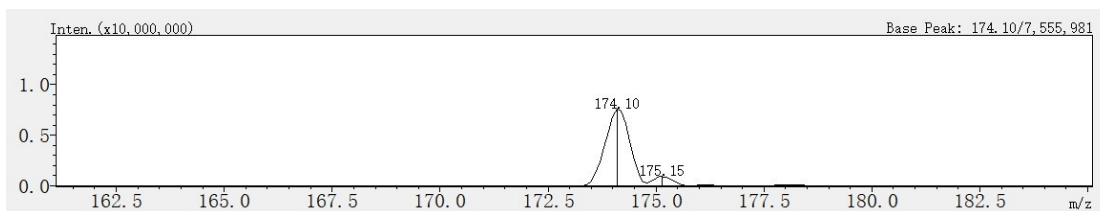

#### 4-(4-Methoxyphenyl)-2-methyloxazole (3r)<sup>3</sup>

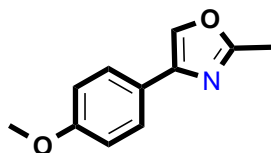

Following the general procedure (EtOAc/Petroleum ether 1:25), 3r was obtained as light yellow semi-solid, isolated yield: 92. <sup>1</sup>H NMR (400 MHz, CDCl<sub>3</sub>): δ 7.70 (s, 1H), 7.63 (d, *J* = 8.8 Hz, 2H), 6.93 (d, *J* = 8.8 Hz, 2H), 3.81 (s, 3H), 2.49 (s, 3H); <sup>13</sup>C NMR (100 MHz, CDCl<sub>3</sub>): δ 161.7, 159.4, 140.5, 132.1, 126.7, 123.9, 114.2, 55.3, 14.0. *m/z* = 189.08, MS: *m/z* = 207.

#### 4-(4-Fluorophenyl)-2-methyl-1,3-oxazol (3s)<sup>3</sup>

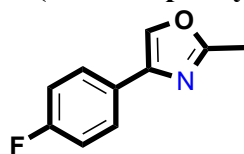

Following the general procedure (EtOAc/Petroleum ether 1:25), 3s was obtained as light yellow semi-solid, isolated yield: 89%. <sup>1</sup>H NMR (400 MHz, CDCl<sub>3</sub>): δ 7.74 (s, 1H), 7.68 (q, *J* = 5.2 Hz, 2H), 7.07 (t, *J* = 8.8 Hz, 2H), 2.50 (s, 3H); <sup>13</sup>C NMR (100 MHz, CDCl<sub>3</sub>): δ 163.7, 161.9, 161.3, 139.9, 132.8 (d, *J*<sub>c-f</sub> = 2.0 Hz), 127.4 (q, *J*<sub>c-f</sub> = 3.0 Hz), 115.6 (d, *J*<sub>c-f</sub> = 22.0 Hz), 13.9. *m/z* = 177.06, LC-MS spectrum (+): *m/z* = 178.10.

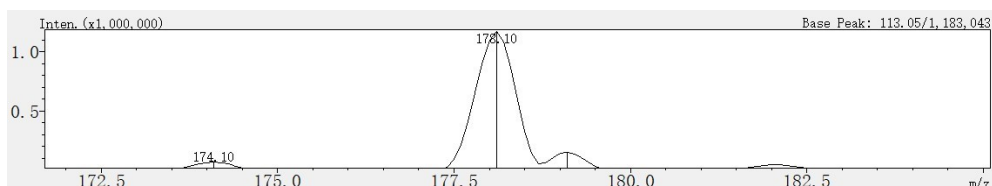

#### 4-(4-Chlorophenyl)-2-methyloxazole (3t)<sup>3</sup>

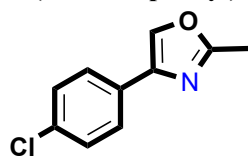

Following the general procedure (EtOAc/Petroleum ether 1:25), 3t was obtained as yellow solid, isolated yield: 91%, m.p. 73-75 °C. <sup>1</sup>H NMR (400 MHz, CDCl<sub>3</sub>): δ 7.79 (s, 1H), 7.64 (d, *J* = 8.4 Hz, 2H), 7.36 (d, *J* = 8.4 Hz, 2H), 2.51 (s, 3H); <sup>13</sup>C NMR (100 MHz, CDCl<sub>3</sub>): δ 162.0, 139.8, 133.6, 133.3, 129.7, 128.9, 126.7, 13.9. *m/z* = 193.03, LC-MS spectrum (+): *m/z* = 194.05.

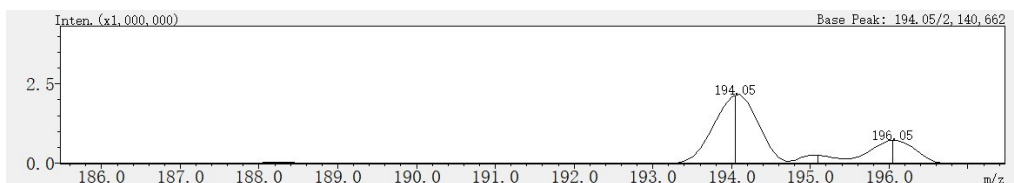

#### 4-(4-Bromophenyl)-2-methyloxazole (3u)<sup>3</sup>

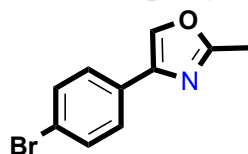

Following the general procedure (EtOAc/Petroleum ether 1:25), 3u was obtained as light yellow semi-solid, isolated yield: 88%. <sup>1</sup>H NMR (400 MHz, CDCl<sub>3</sub>): δ 7.79 (s, 1H), 7.58 (d, *J* = 8.8 Hz, 2H), 7.52 (d, *J* = 8.8 Hz, 2H), 2.50 (s, 3H); <sup>13</sup>C NMR (100 MHz, CDCl<sub>3</sub>): δ 162.0, 139.8, 133.4, 131.9, 130.2, 127.0, 121.7, 13.9. *m/z* = 236.98, LC-MS spectrum (+): *m/z* = 238.60.

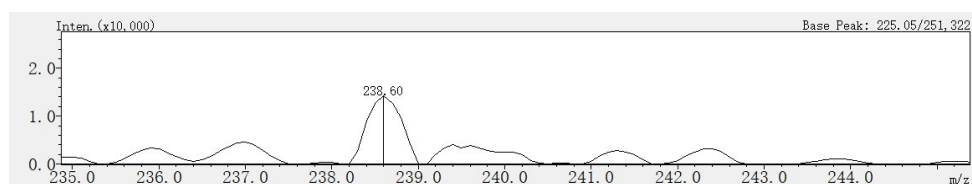

#### 2-Methyl-4-(4-nitrophenyl) oxazole (3v)

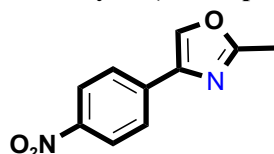

Following the general procedure (EtOAc/Petroleum ether 1:25), 3v was obtained as yellow solid, isolated yield: 86%, m.p. 133-135 °C. <sup>1</sup>H NMR (400 MHz, CDCl<sub>3</sub>): δ 8.27 (d, *J* = 8.8 Hz, 2H), 7.96 (s, 1H), 7.88 (d, *J* = 8.8 Hz, 2H), 2.54 (s, 3H); <sup>13</sup>C NMR (100 MHz, CDCl<sub>3</sub>): δ 162.7, 147.2, 139.1, 137.6, 135.4, 125.9, 124.2, 14.0. *m/z* = 204.05, LC-MS spectrum (+): *m/z* = 205.10, calculated for C<sub>10</sub>H<sub>8</sub>N<sub>2</sub>O<sub>3</sub> [M+H]<sup>+</sup>: 205.0613, Found [M+H]<sup>+</sup>: 205.0616.

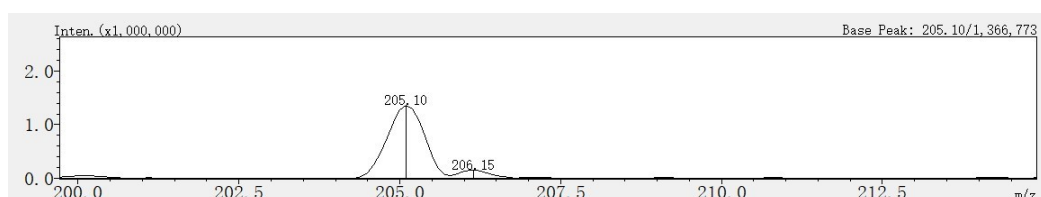

#### 4-(2-Methyloxazol-4-yl) phenol (3w)

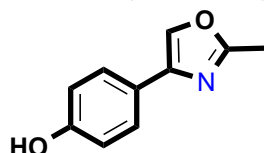

Following the general procedure (EtOAc/Petroleum ether 1:25), 3w was obtained as yellow solid, isolated yield: 80%, m.p. 115-118 °C. <sup>1</sup>H NMR (400 MHz, DMSO-*d*<sub>6</sub>): δ 9.56 (s, 1H), 8.22 (s, 1H), 7.57 (d, *J* = 8.8 Hz, 2H), 6.83 (d, *J* = 8.8 Hz, 2H), 2.44 (s, 3H); <sup>13</sup>C NMR (100 MHz, DMSO-*d*<sub>6</sub>): δ 161.0, 157.2, 139.9, 132.7, 126.5, 122.1, 115.5, 13.5. *m/z* = 175.06, LC-MS spectrum

(+):  $m/z = 176.10$ , calculated for  $C_{10}H_9NO_2$   $[M+H]^+$ : 176.0711, Found  $[M+H]^+$ : 176.0717.

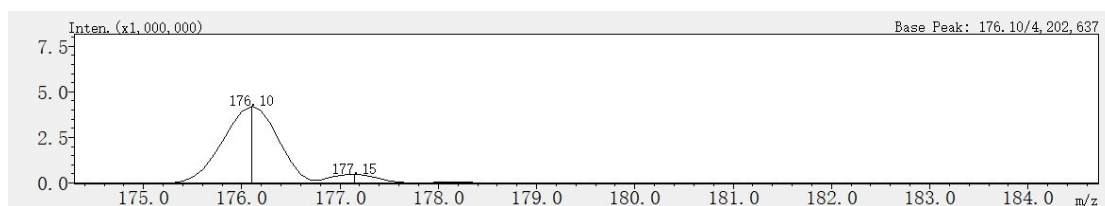

### 2-Methyl-4-(4-(trifluoromethyl) phenyl) oxazole (3x)<sup>3</sup>

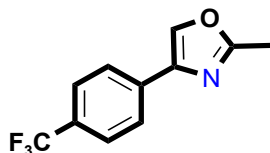

Following the general procedure (EtOAc/Petroleum ether 1:25), 3x was obtained as yellow solid, isolated yield: 81%, m.p. 98-110 °C.  $^1H$  NMR (400 MHz,  $CDCl_3$ ):  $\delta$  7.88 (s, 1H), 7.82 (d,  $J = 8.0$  Hz, 2H), 7.65 (d,  $J = 8.0$  Hz, 2H), 2.53 (s, 3H);  $^{13}C$  NMR (100 MHz,  $CDCl_3$ ):  $\delta$  162.3, 139.6, 134.7, 134.3, 130.2 (q,  $J_{c-f} = 33.0$  Hz), 125.7, 125.6, 125.5, 13.9.  $m/z = 227.06$ , LC-MS spectrum (+):  $m/z = 228.10$ .

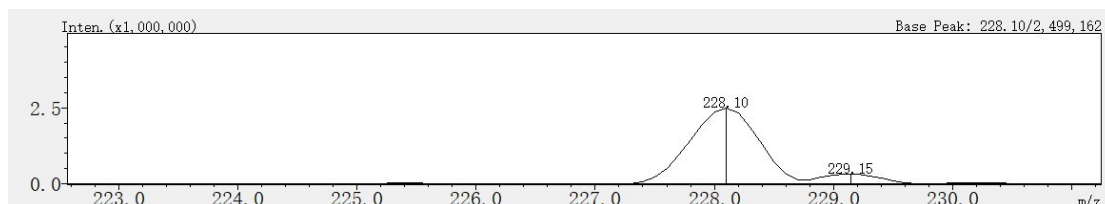

### 2-Methyl-4-(naphthalen-2-yl)oxazole (3y)<sup>3</sup>

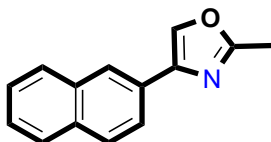

Following the general procedure (EtOAc/Petroleum ether 1:25), 3y was obtained as yellow solid, isolated yield: 88%, m.p. 93-95 °C.  $^1H$  NMR (400 MHz,  $CDCl_3$ ):  $\delta$  8.25 (s, 1H), 7.90 (s, 1H), 7.86-7.80 (m, 3H), 7.73 (d,  $J = 6.8$  Hz, 1H), 7.49-7.43 (m, 2H), 2.55 (s, 3H);  $^{13}C$  NMR (100 MHz,  $CDCl_3$ ):  $\delta$  162.0, 140.8, 133.7, 133.6, 133.1, 128.5, 128.4, 128.2, 127.7, 126.4, 126.0, 124.2, 123.4, 14.0.  $m/z = 209.08$ , LC-MS spectrum (+):  $m/z = 210.15$ .

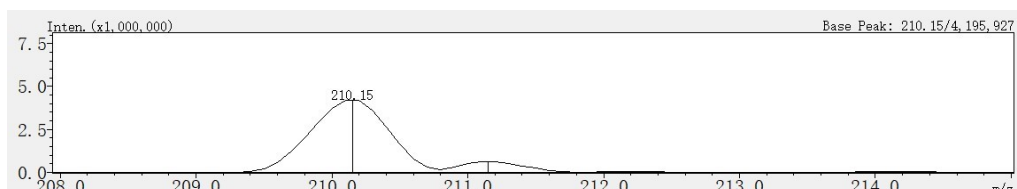

### 2-Methyl-4-(thiophen-2-yl)oxazole (3z)<sup>3</sup>

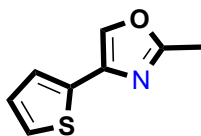

Following the general procedure (EtOAc/Petroleum ether 1:25), 3z was obtained as light yellow semi-solid, isolated yield: 85%.  $^1\text{H}$  NMR (400 MHz,  $\text{CDCl}_3$ ):  $\delta$  7.71 (s, 1H), 7.30-7.25 (m, 2H), 7.04 (d,  $J$  = 3.6 Hz, 1H), 2.49 (s, 3H);  $^{13}\text{C}$  NMR (100 MHz,  $\text{CDCl}_3$ ):  $\delta$  161.8, 135.8, 133.9, 132.4, 127.6, 124.7, 123.7, 13.4.  $m/z$  = 165.02, LC-MS spectrum (+):  $m/z$  = 166.05.

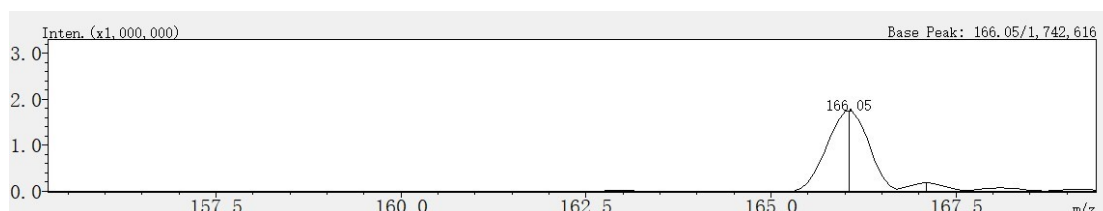

#### 4-(3-Chlorophenyl)-2-methyloxazole (3z1)<sup>3</sup>

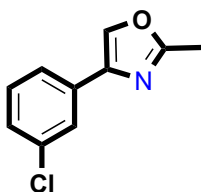

Following the general procedure (EtOAc/Petroleum ether 1:25), 3z1 was obtained as light yellow semi-solid, isolated yield: 84%.  $^1\text{H}$  NMR (400 MHz,  $\text{CDCl}_3$ ):  $\delta$  7.81 (s, 1H), 7.71 (s, 1H), 7.58 (d,  $J$  = 7.6 Hz, 1H), 7.33-7.26 (m, 2H), 2.51 (s, 3H);  $^{13}\text{C}$  NMR (100 MHz,  $\text{CDCl}_3$ ):  $\delta$  162.1, 139.6, 134.8, 133.7, 133.0, 130.0, 127.9, 125.5, 123.5, 14.0.  $m/z$  = 193.03, LC-MS spectrum (+):  $m/z$  = 194.05.

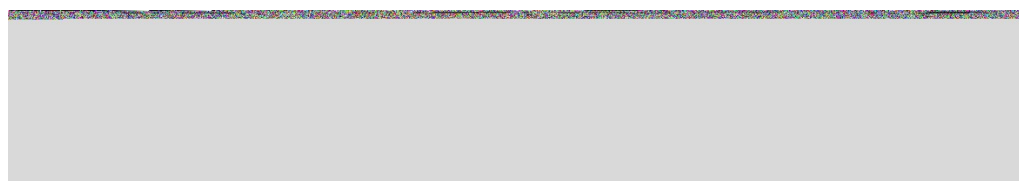

#### 4-(3-Bromophenyl)-2-methyloxazole (3z2)<sup>3</sup>

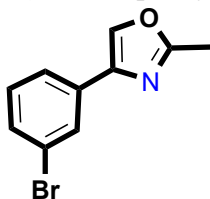

Following the general procedure (EtOAc/Petroleum ether 1:25), 3z2 was obtained as light yellow semi-solid, isolated yield: 82%.  $^1\text{H}$  NMR (400 MHz,  $\text{CDCl}_3$ ):  $\delta$  7.87 (s, 1H), 7.80 (s, 1H), 7.62 (d,  $J$  = 7.6 Hz, 1H), 7.42 (d,  $J$  = 6.0 Hz, 1H), 7.24 (t,  $J$  = 7.8 Hz, 1H), 2.51 (s, 3H);  $^{13}\text{C}$  NMR (100 MHz,  $\text{CDCl}_3$ ):  $\delta$  162.1, 139.5, 133.7, 133.2, 130.8, 130.2, 128.4, 123.9, 122.9, 13.9.  $m/z$  = 236.98, LC-MS spectrum (+):  $m/z$  = 238.60.

#### 4-(2-Chlorophenyl)-2-methyloxazole (3z3)<sup>3</sup>

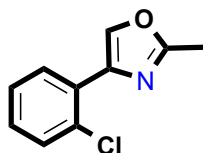

Following the general procedure (EtOAc/Petroleum ether 1:25), 3z3 was obtained as light yellow semi-solid, isolated yield: 82%. <sup>1</sup>H NMR (400 MHz, CDCl<sub>3</sub>): δ 8.23 (s, 1H), 8.10 (d, *J* = 8.0 Hz, 1H), 7.43 (d, *J* = 8.0 Hz, 1H), 7.33 (t, *J* = 7.6 Hz, 1H), 7.21 (t, *J* = 7.6 Hz, 1H), 2.52 (s, 3H); <sup>13</sup>C NMR (100 MHz, CDCl<sub>3</sub>): δ 160.6, 137.0, 136.8, 131.4, 130.2, 129.9, 129.6, 128.4, 126.9, 13.8. *m/z* = 193.03, LC-MS spectrum (+): *m/z* = 194.05

#### 2-Benzyl-4-ethyloxazole (3z4)<sup>5</sup>

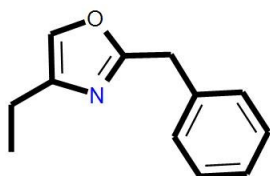

Following the general procedure (EtOAc/Petroleum ether 1:25), 3az4 was obtained as yellow oil solid, isolated yield: 71%. <sup>1</sup>H NMR (400 MHz, DMSO-*d*<sub>6</sub>): δ 7.65 (s, 1H), 7.33-7.21 (m, 5H), 4.06 (s, 2H), 2.43 (q, *J* = 7.6 Hz, 2H), 1.12 (t, *J* = 7.6 Hz, 3H); <sup>13</sup>C NMR (100 MHz, DMSO-*d*<sub>6</sub>): δ 162.3, 142.0, 136.1, 134.1, 128.8, 128.6, 126.8, 33.8, 19.2, 12.6. *m/z* = 187.10, LC-MS spectrum (+): *m/z* = 188.15, HRMS (ESI<sup>+</sup>): Calculated for C<sub>12</sub>H<sub>13</sub>NO [M+H]<sup>+</sup>: 188.1076, Found [M+H]<sup>+</sup>: 188.1069.

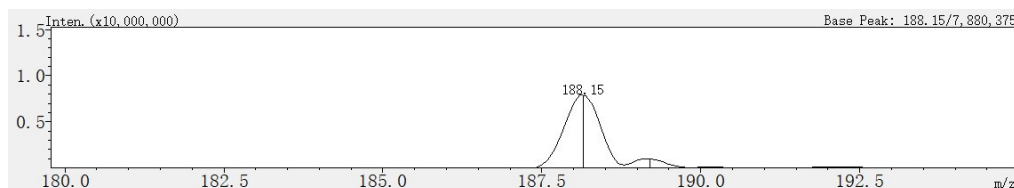

## 6. Reference

- (1) P. F. Carneiro, B. Gutmann, R. O. M. A. de Souza and C. O. Kappe, *ACS Sustainable Chem. Eng.*, 2015, 3, 3445–3453.
- (2) Takuma Yagyu, Yusuke Takemoto, Akira Yoshimura, Viktor V. Zhdankin, and Akio Saito, *Org. Lett.* 2017, 19, 2506–2509
- (3) Kang Xu, Ruiqi Yang, Shuang Yang, Cheng Jiang, Zhenhua Ding, *Org. Biomol. Chem.*, 2019, 17, 8977.
- (4) Hiroki Yoneyama, Naoki Oka, Yoshihide Usami, Shinya Harusawa, *Tetrahedron Letters* 61 (2020) 151983.
- (5) M. Ramana Reddy, G. Niranjana Reddy, Umer Mehmood, Ibnelwaleed A. Hussein, S. U. Rahman, Khalil Harrabi, Basireddy V. Subba Reddy, *Synthesis* 2015, 47, 3315–3320



## 7. Copies of $^1\text{H}$ NMR and $^{13}\text{C}$ NMR spectrum

**3a**  $^1\text{H}$  NMR (400 MHz) and  $^{13}\text{C}$  NMR (100 MHz)

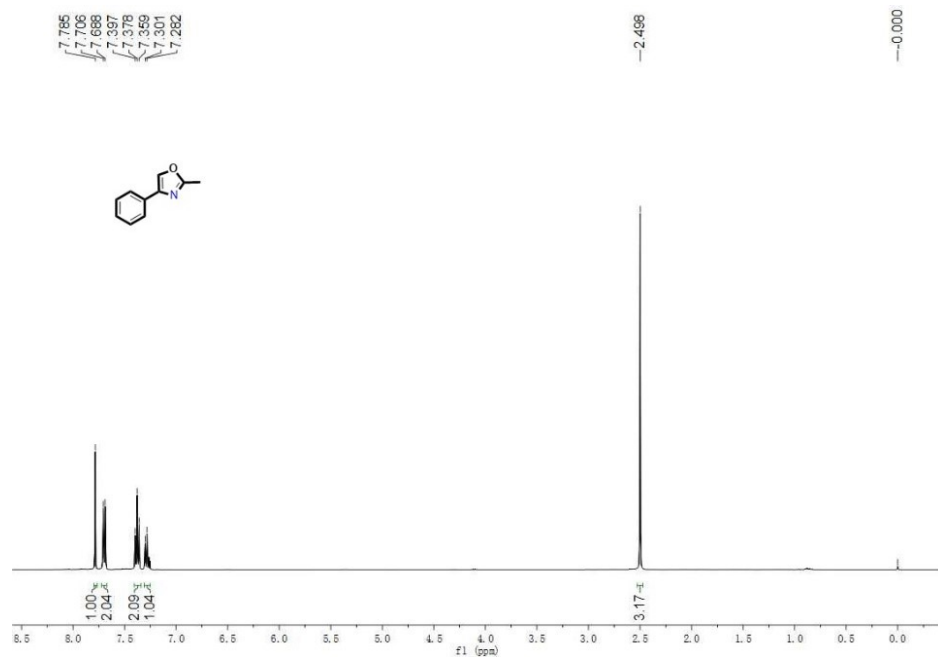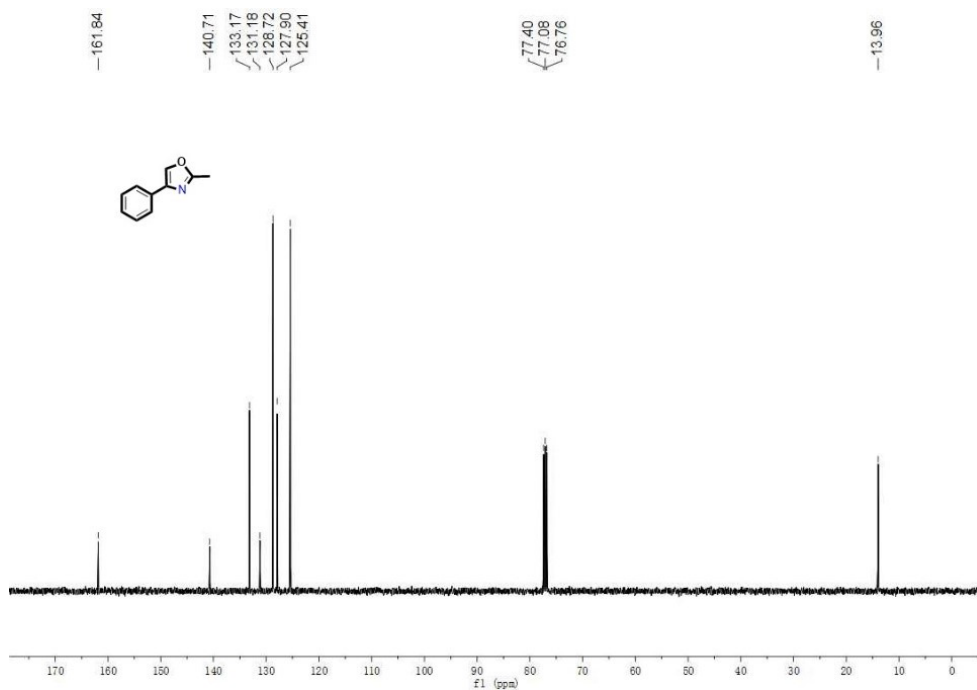

**3b**  $^1\text{H}$  NMR (400 MHz) and  $^{13}\text{C}$  NMR (100 MHz)

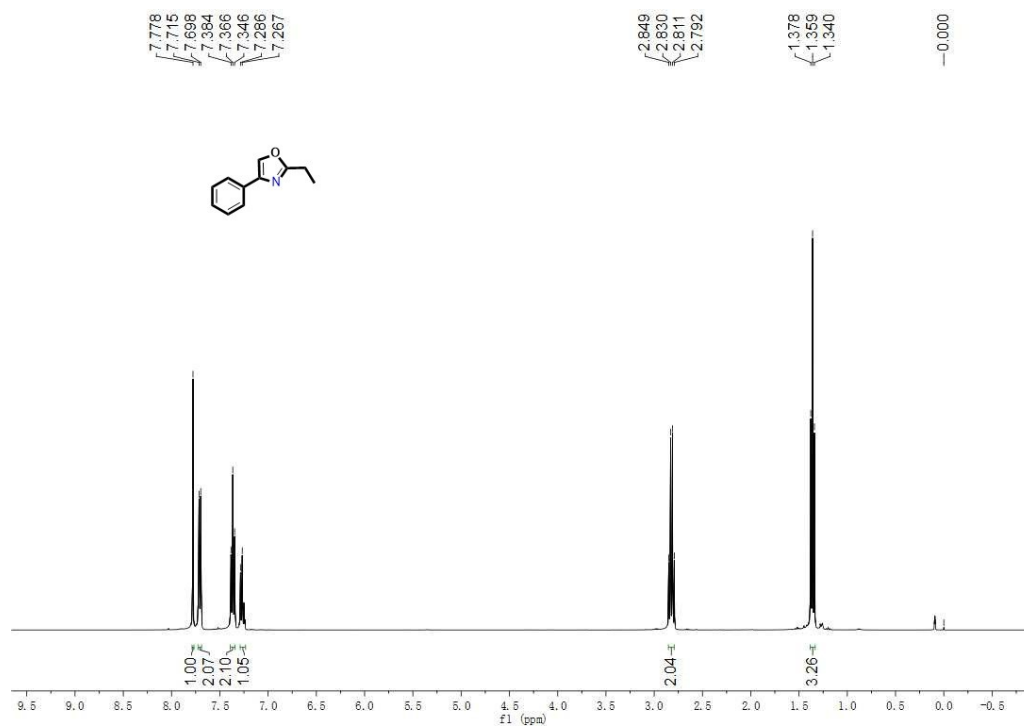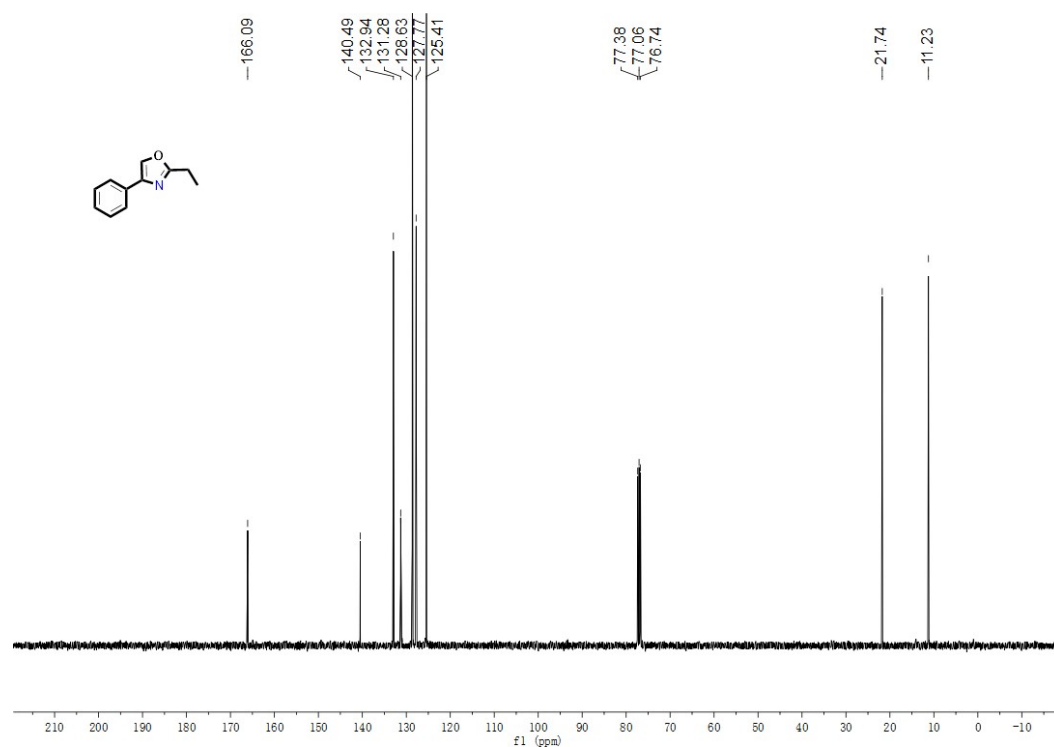

**3c**  $^1\text{H}$  NMR (400 MHz) and  $^{13}\text{C}$  NMR (100 MHz)

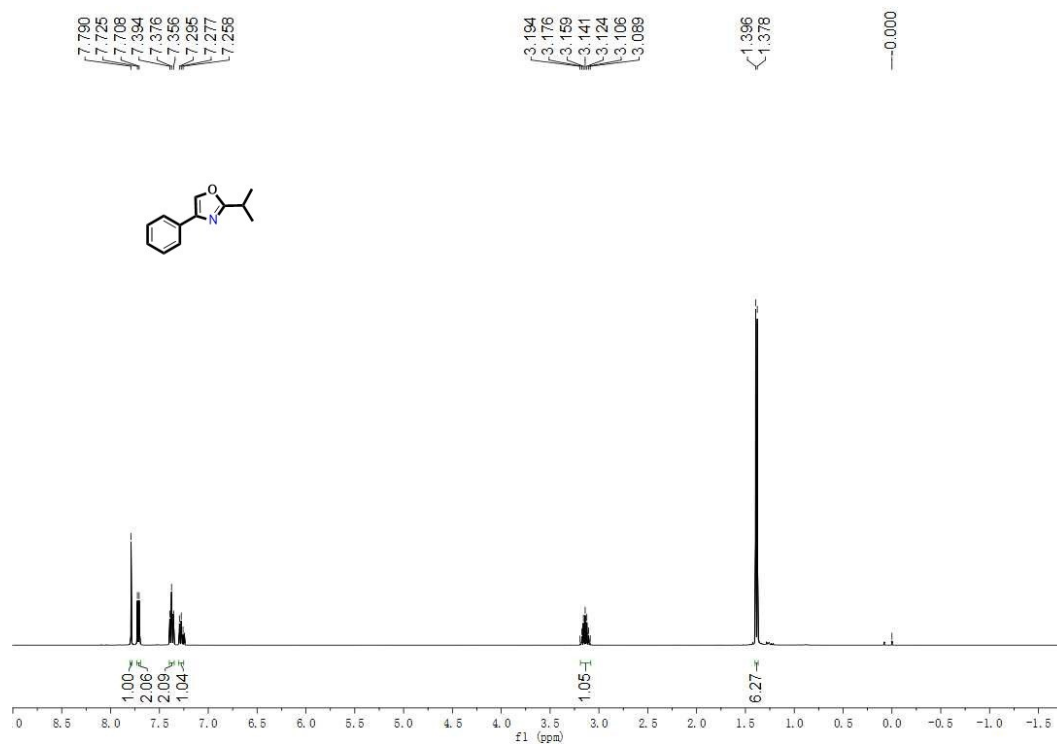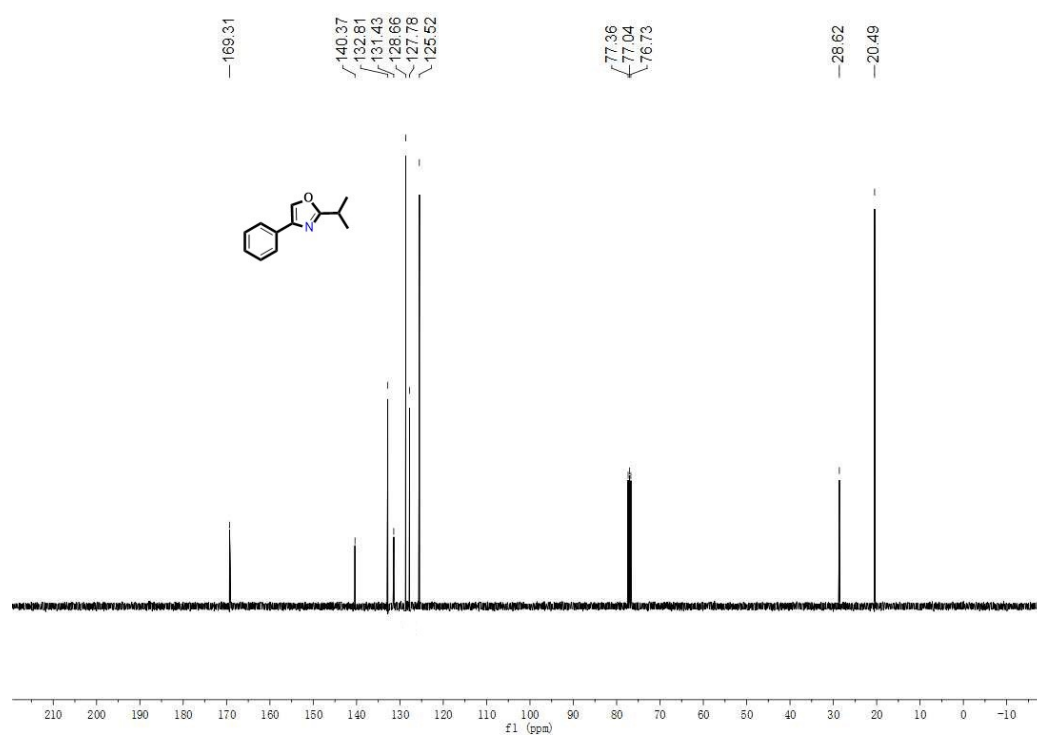

**3d**  $^1\text{H}$  NMR (400 MHz) and  $^{13}\text{C}$  NMR (100 MHz)

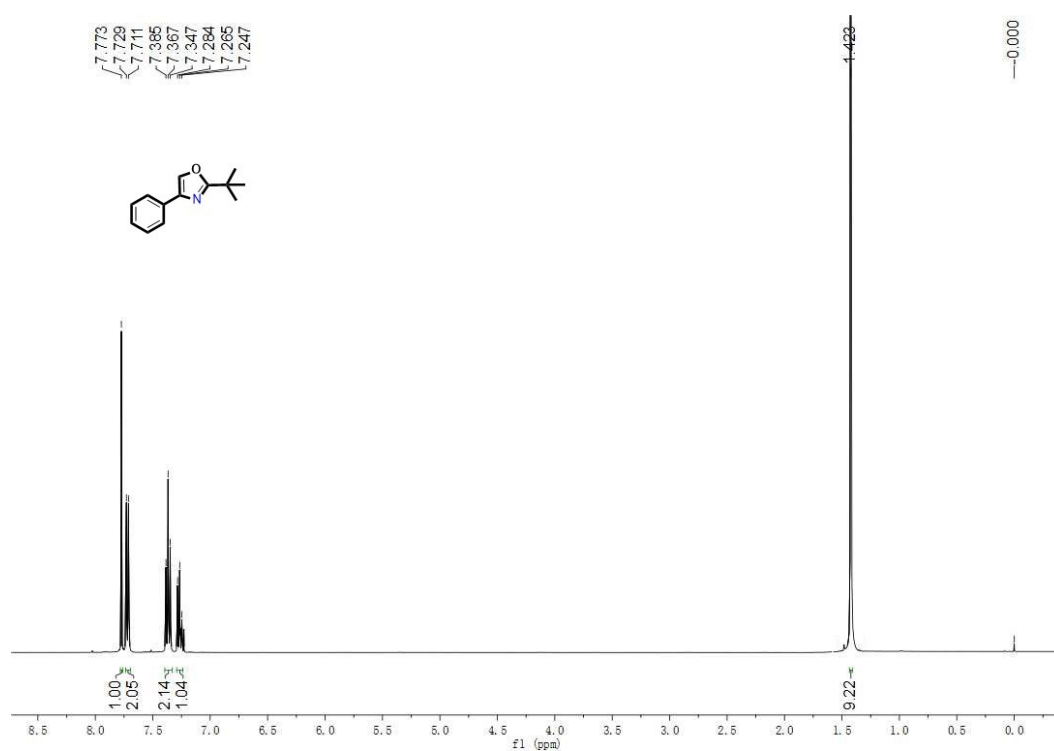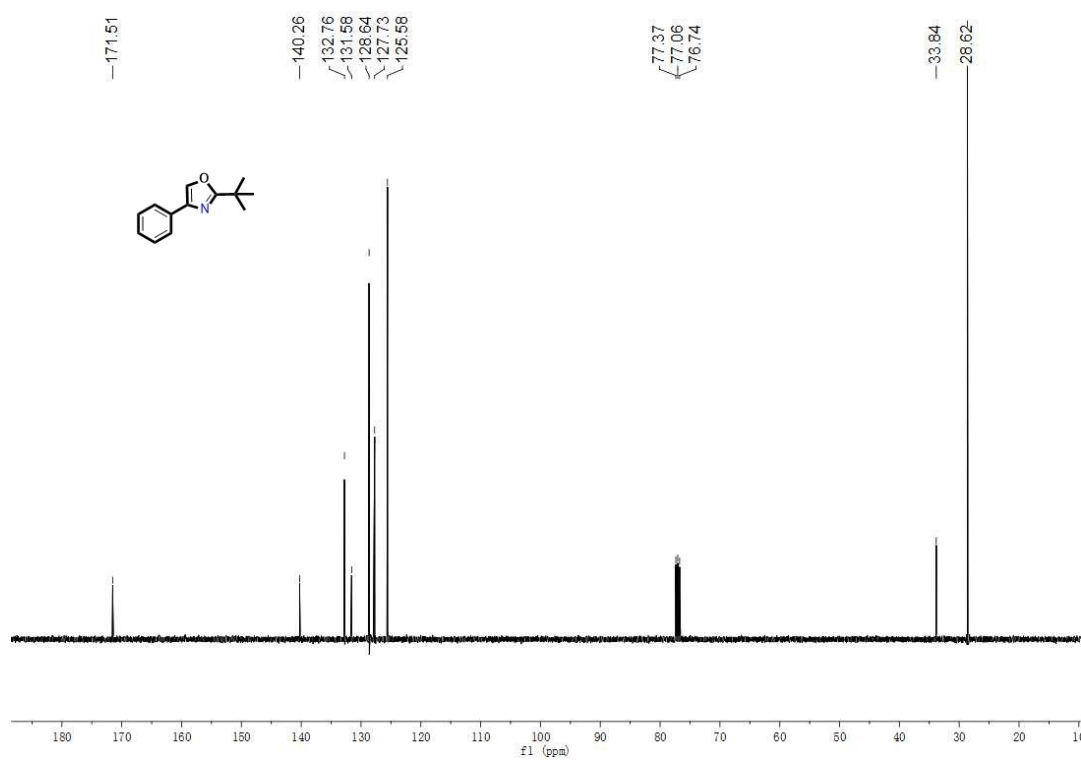

**3e**  $^1\text{H}$  NMR (400 MHz) and  $^{13}\text{C}$  NMR (100 MHz)

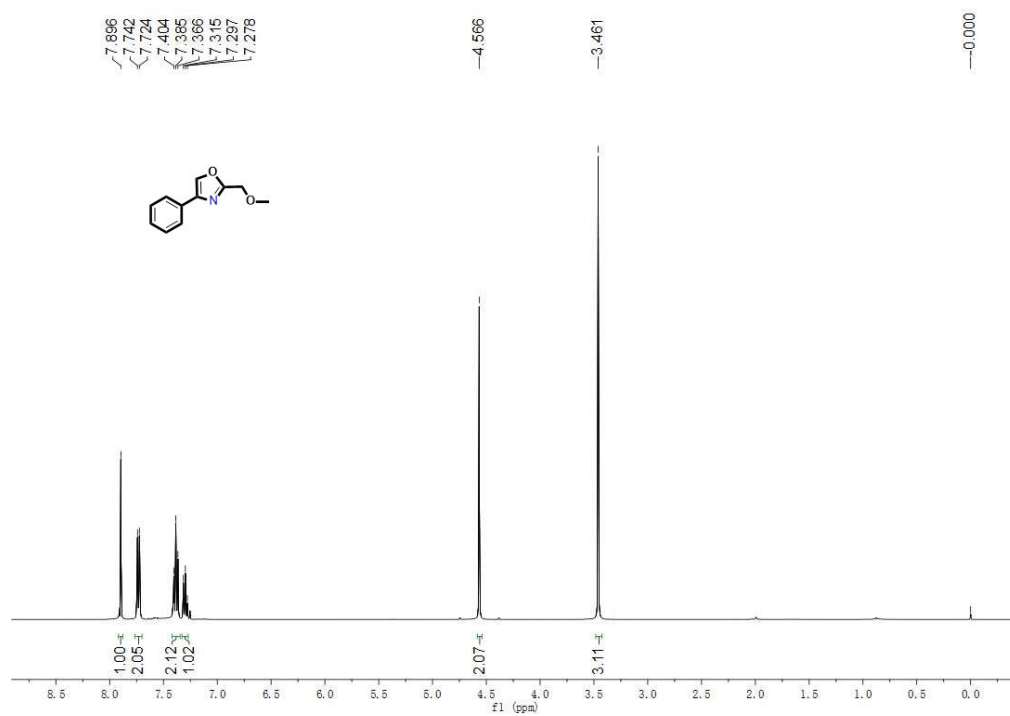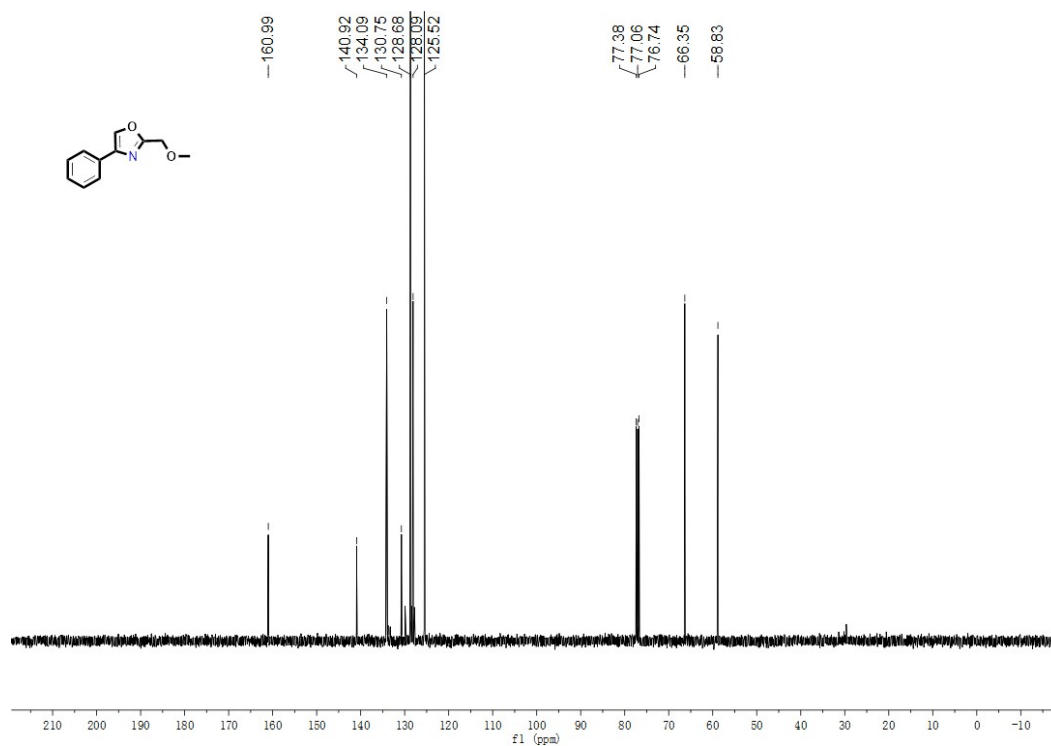

**3f**  $^1\text{H}$  NMR (400 MHz) and  $^{13}\text{C}$  NMR (100 MHz)

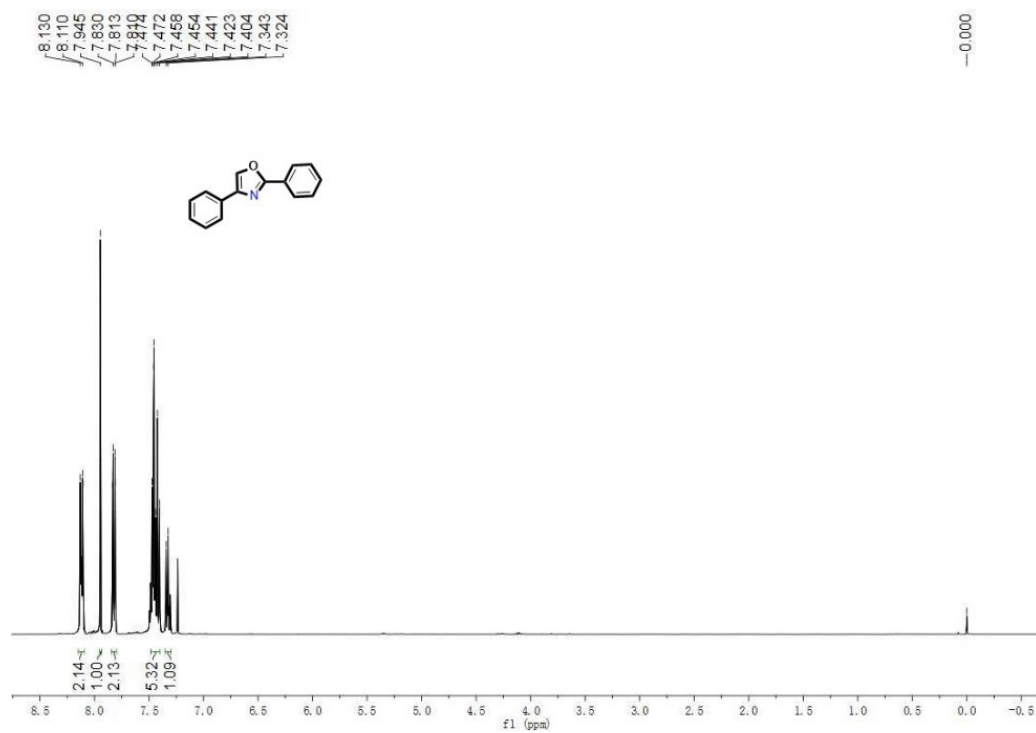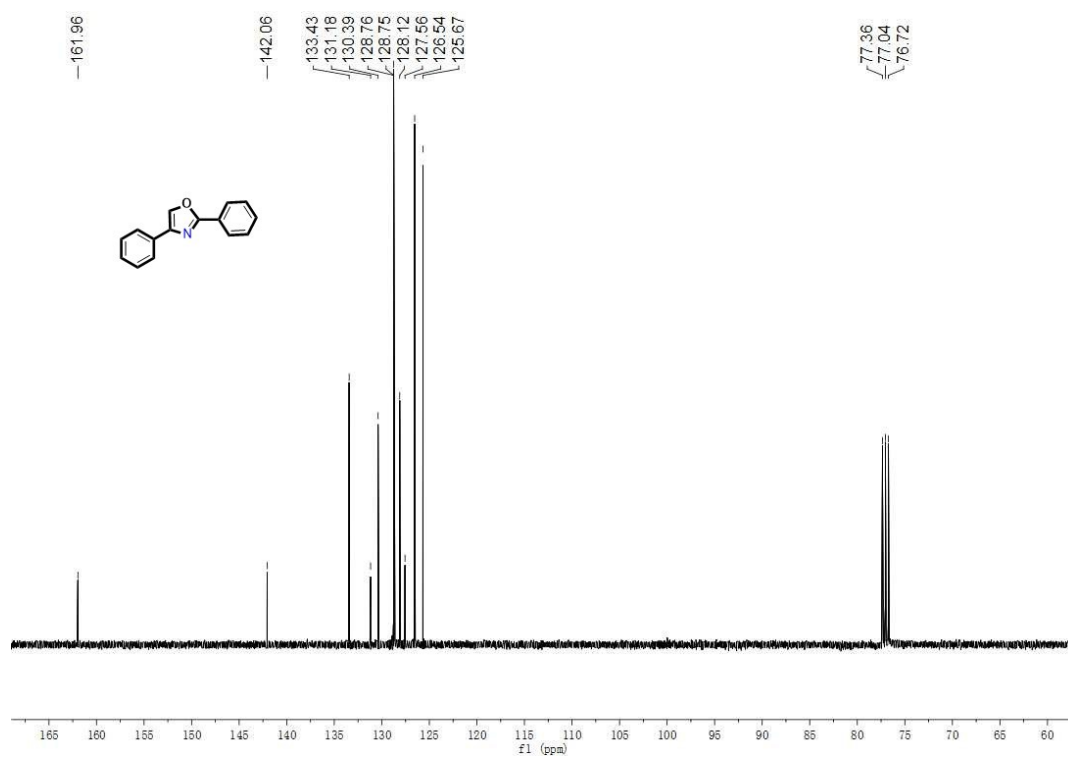

**3g**  $^1\text{H}$  NMR (400 MHz) and  $^{13}\text{C}$  NMR (100 MHz)

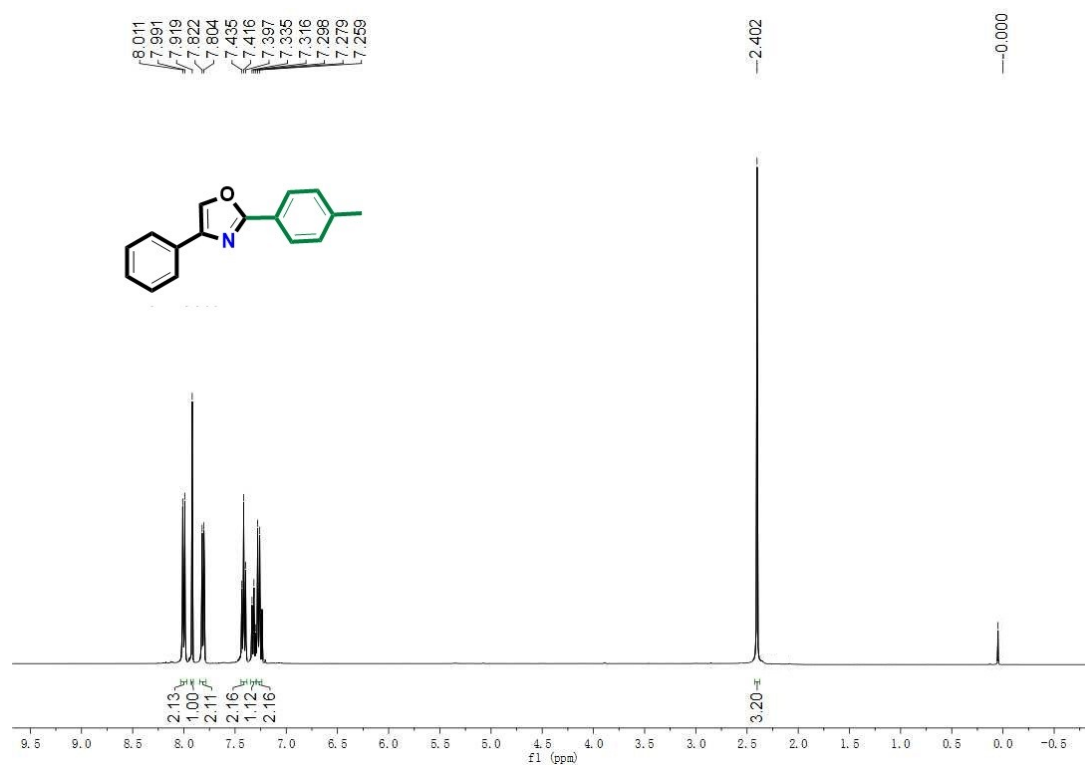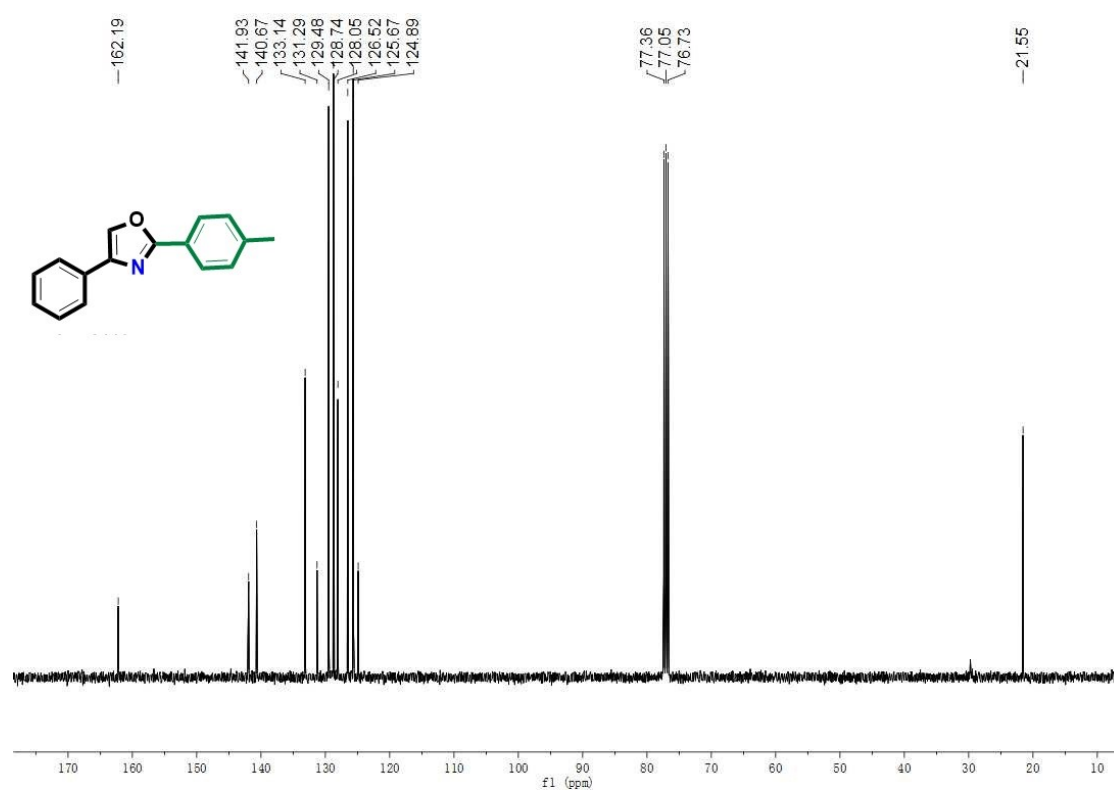

**3h**  $^1\text{H}$  NMR (400 MHz) and  $^{13}\text{C}$  NMR (100 MHz)

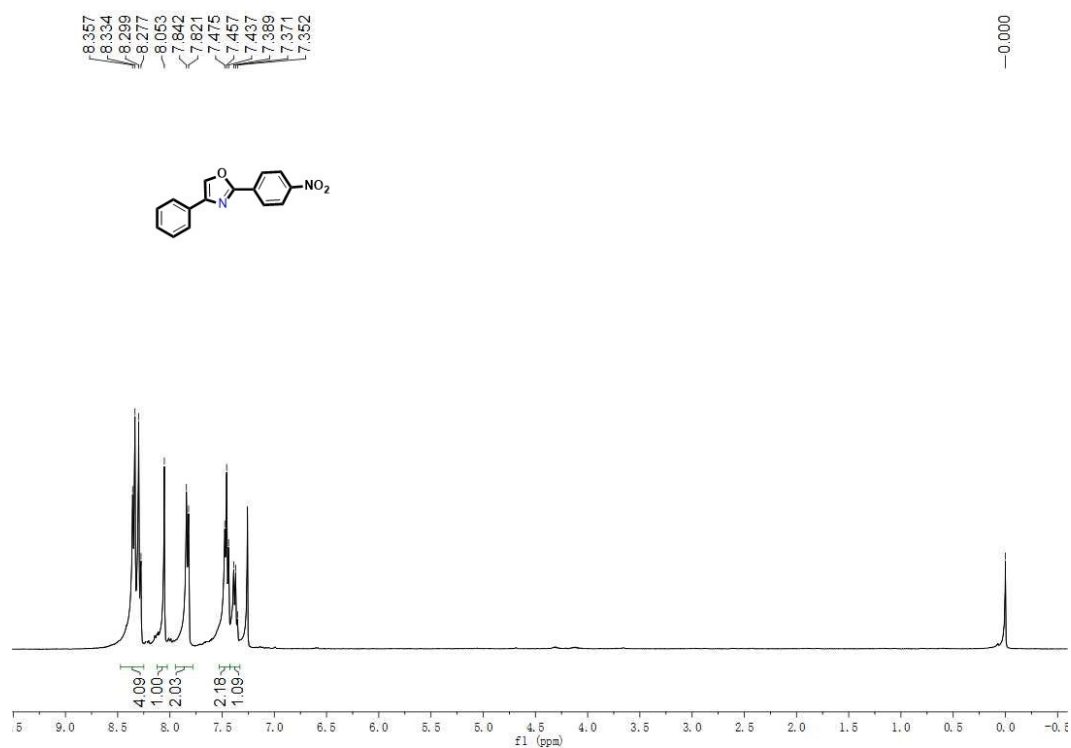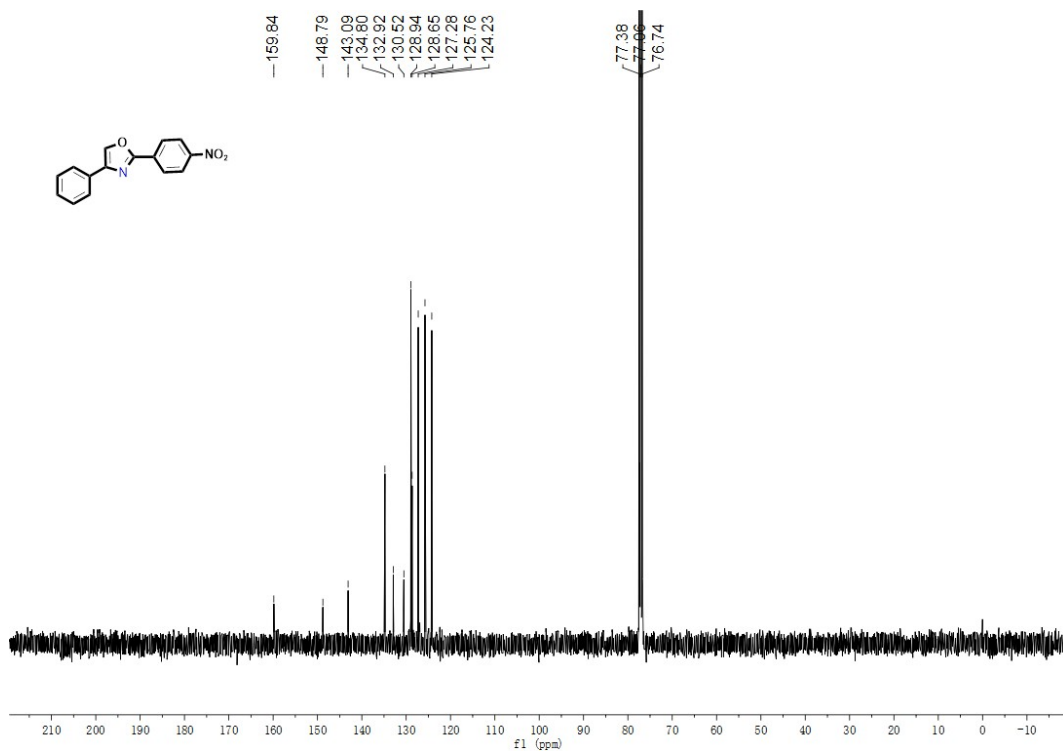



**3i**  $^1\text{H}$  NMR (400 MHz) and  $^{13}\text{C}$  NMR (100 MHz)

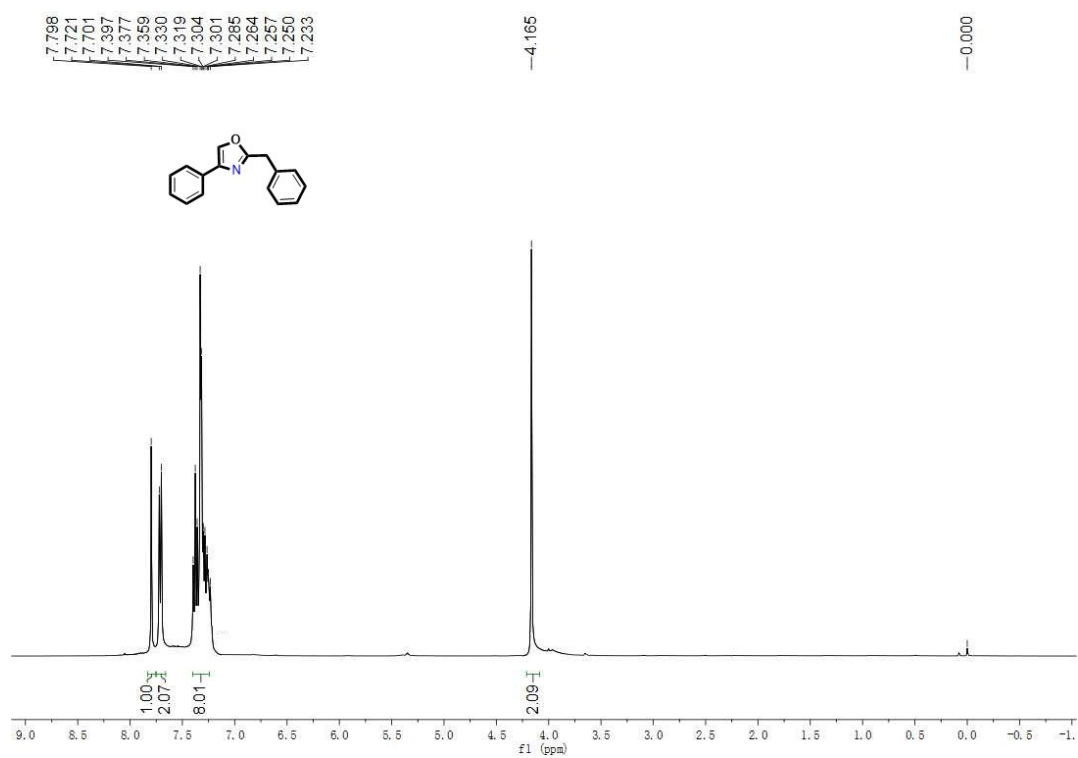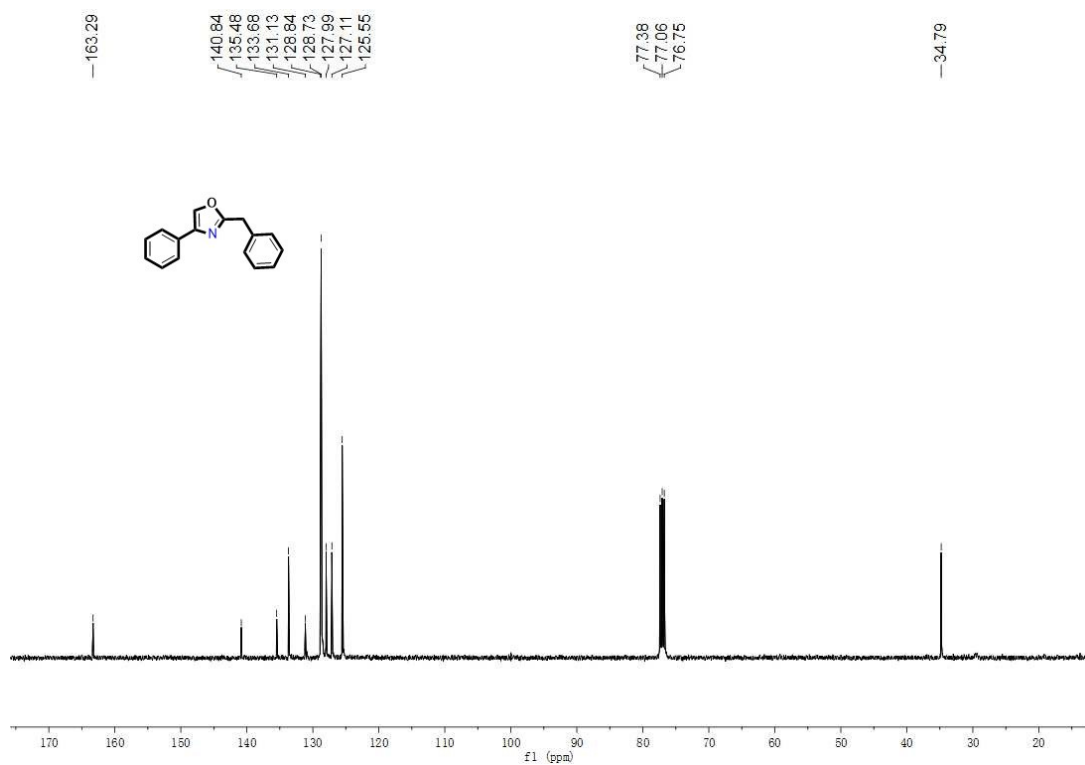

**3j**  $^1\text{H}$  NMR (400 MHz) and  $^{13}\text{C}$  NMR (100 MHz)

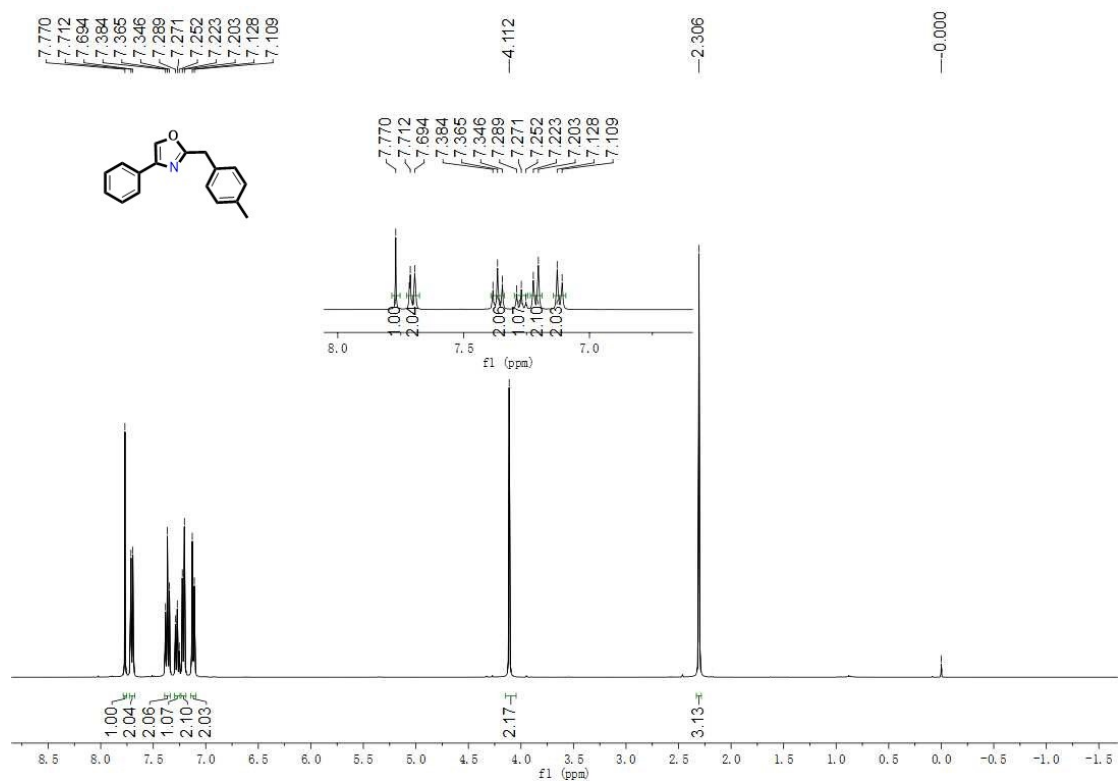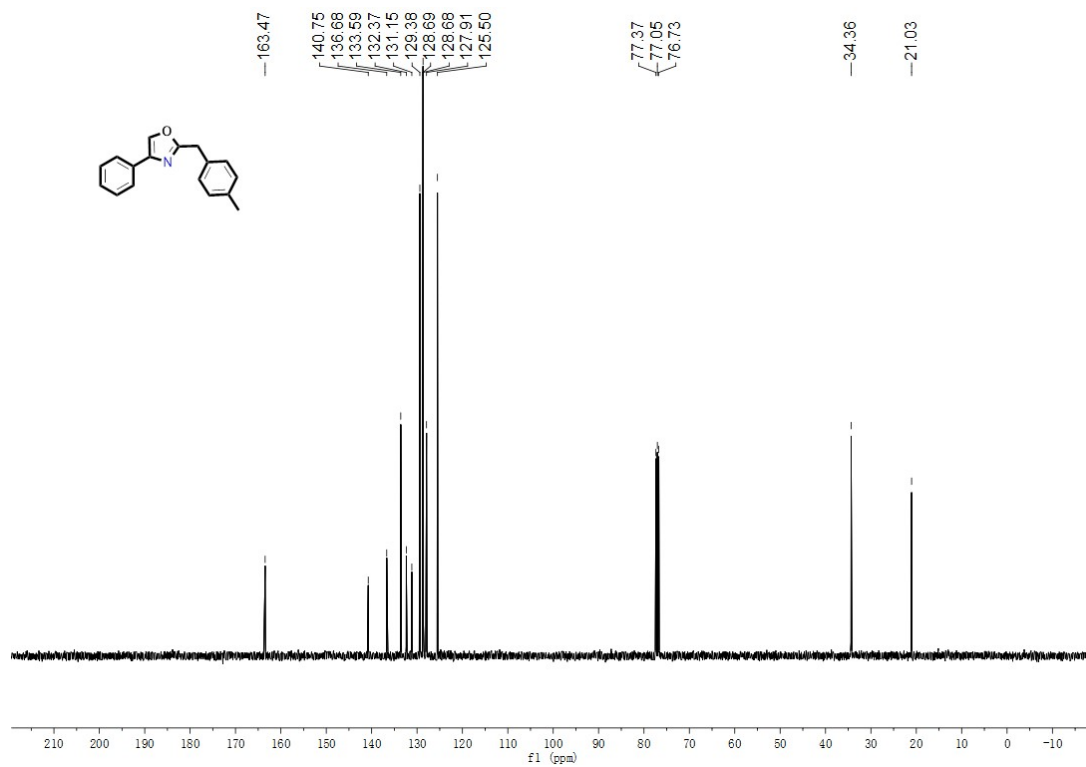

**3k**  $^1\text{H}$  NMR (400 MHz) and  $^{13}\text{C}$  NMR (100 MHz)

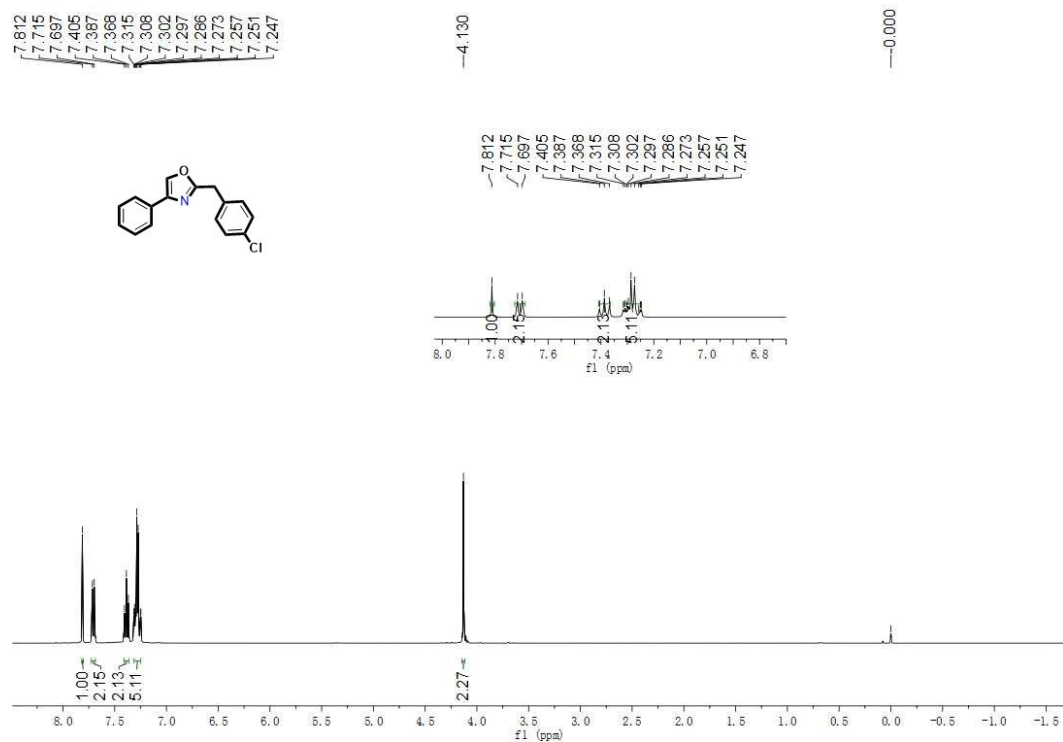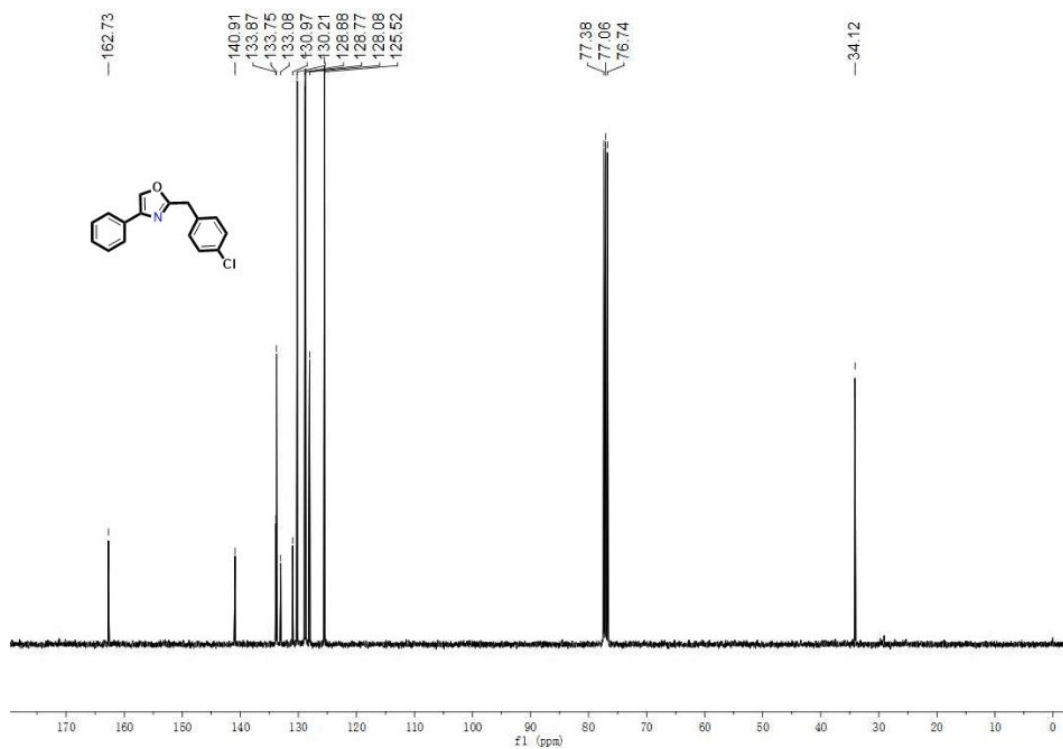

**31**  $^1\text{H}$  NMR (400 MHz) and  $^{13}\text{C}$  NMR (100 MHz)

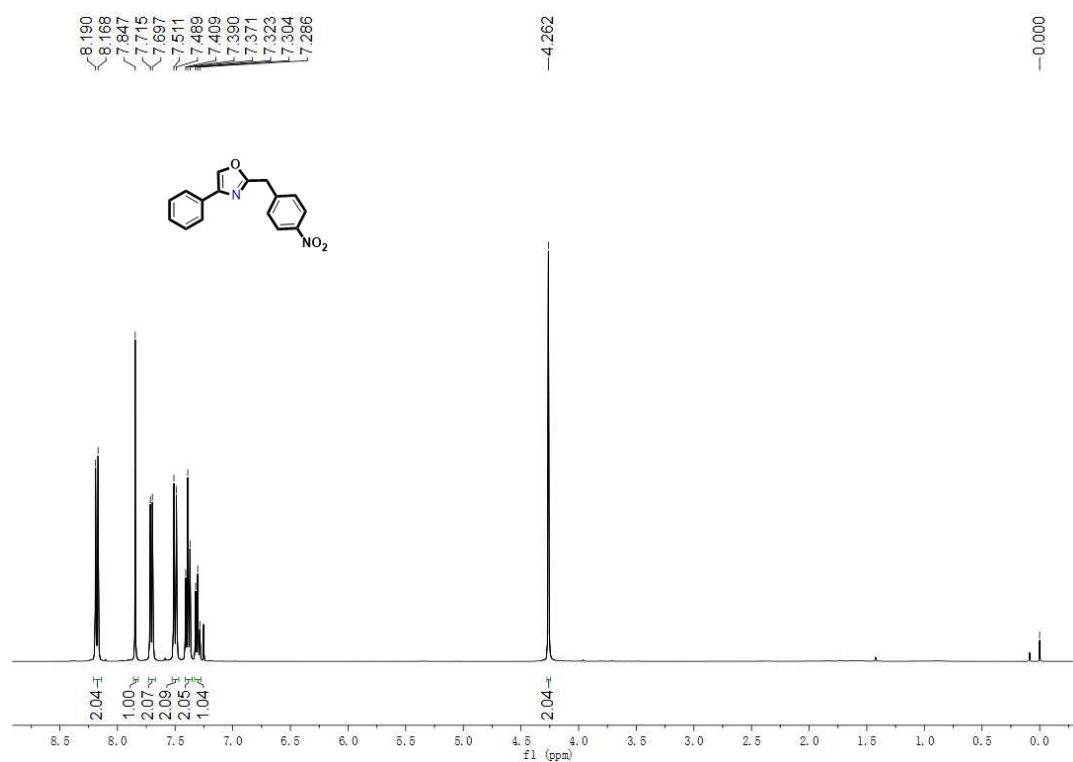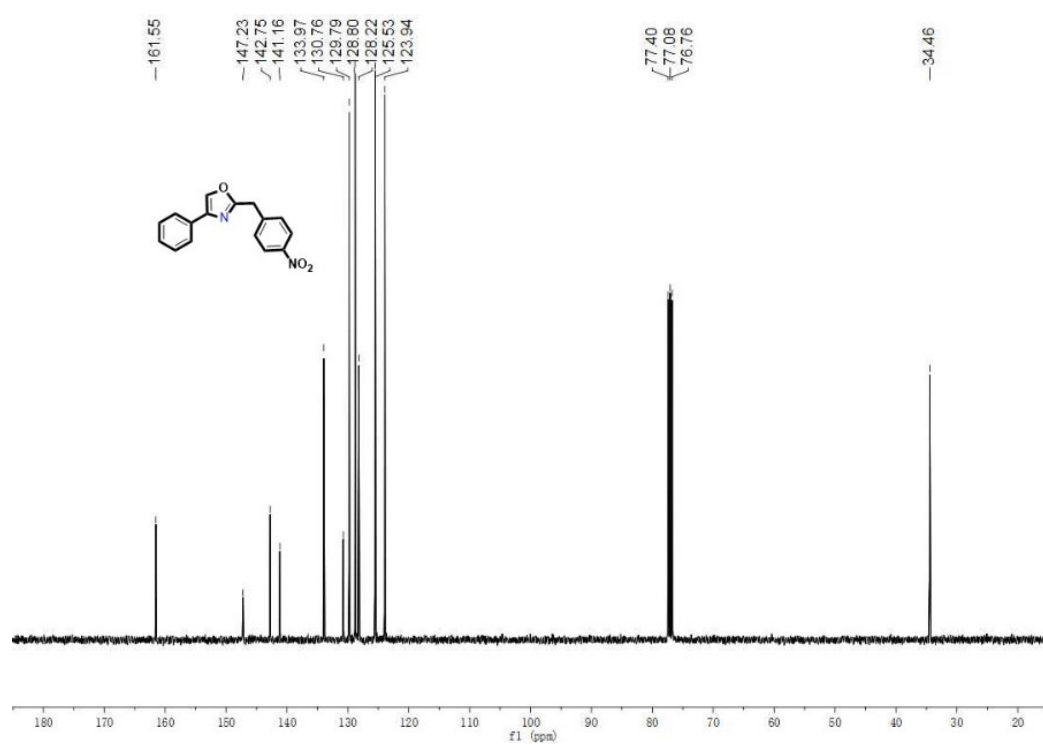

**3m**  $^1\text{H}$  NMR (400 MHz) and  $^{13}\text{C}$  NMR (100 MHz)

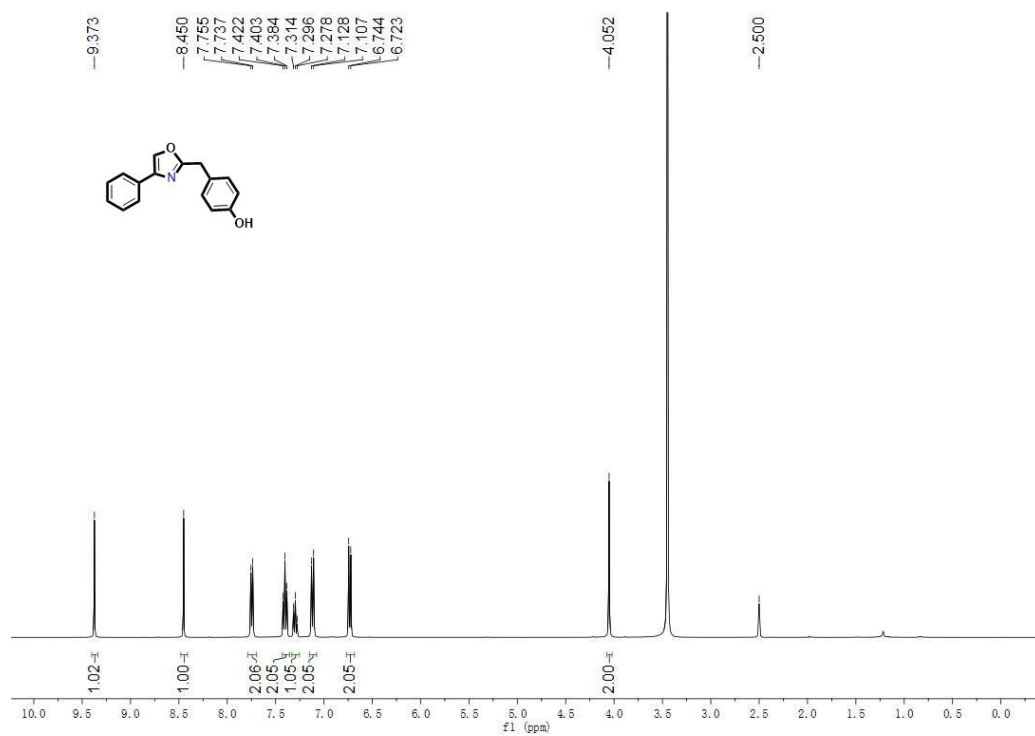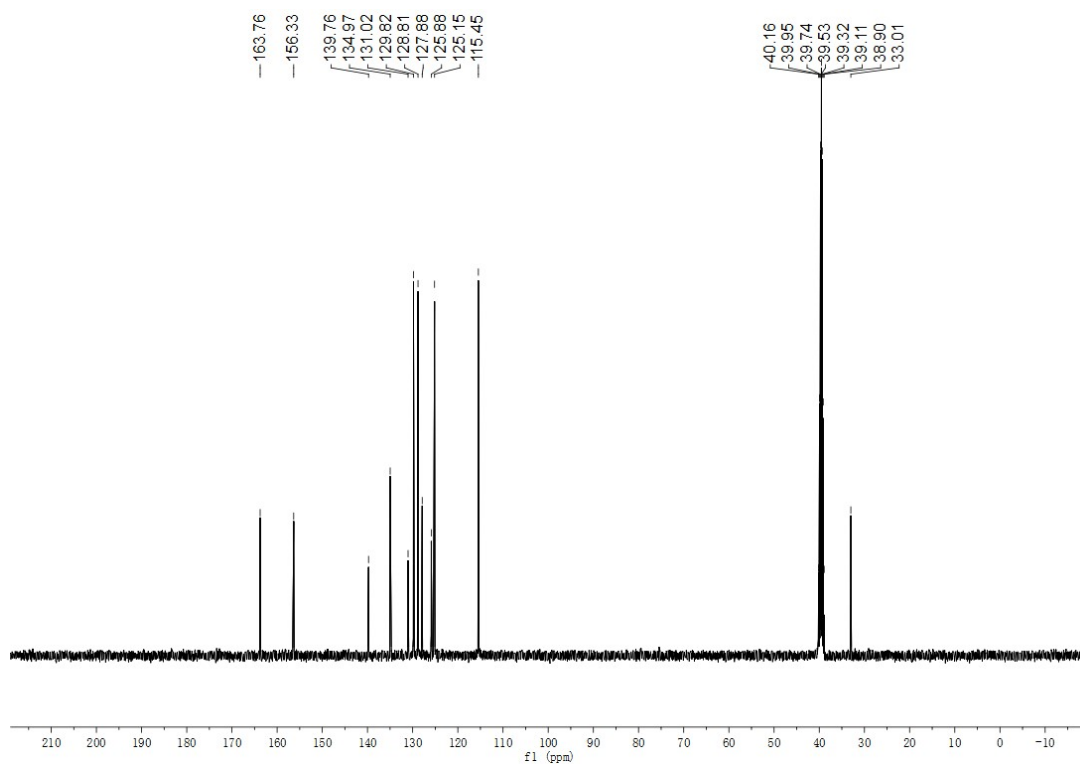

**3n**  $^1\text{H}$  NMR (400 MHz) and  $^{13}\text{C}$  NMR (100 MHz)

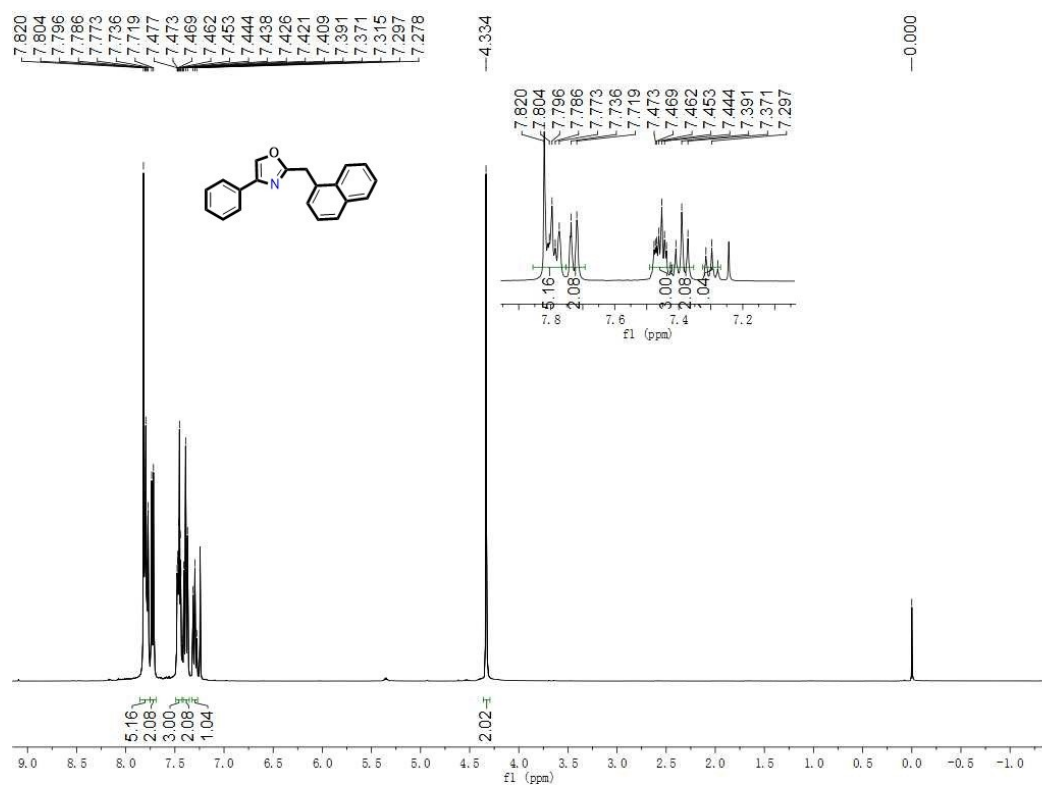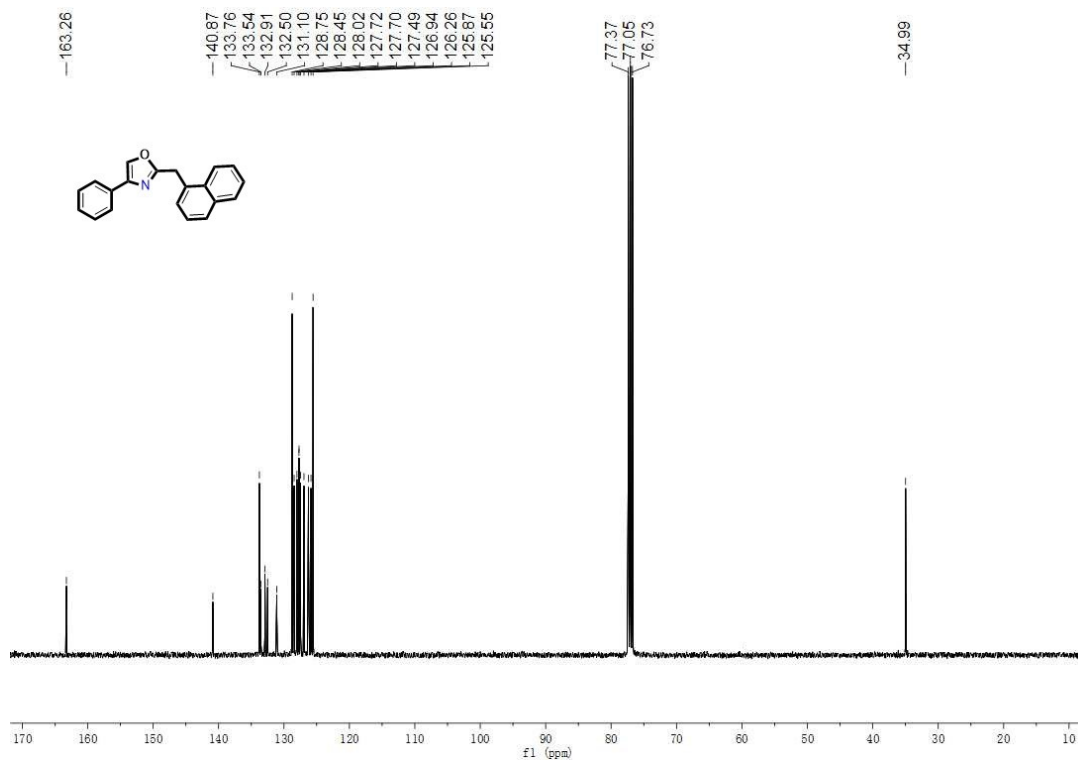

**3o**  $^1\text{H}$  NMR (400 MHz) and  $^{13}\text{C}$  NMR (100 MHz)

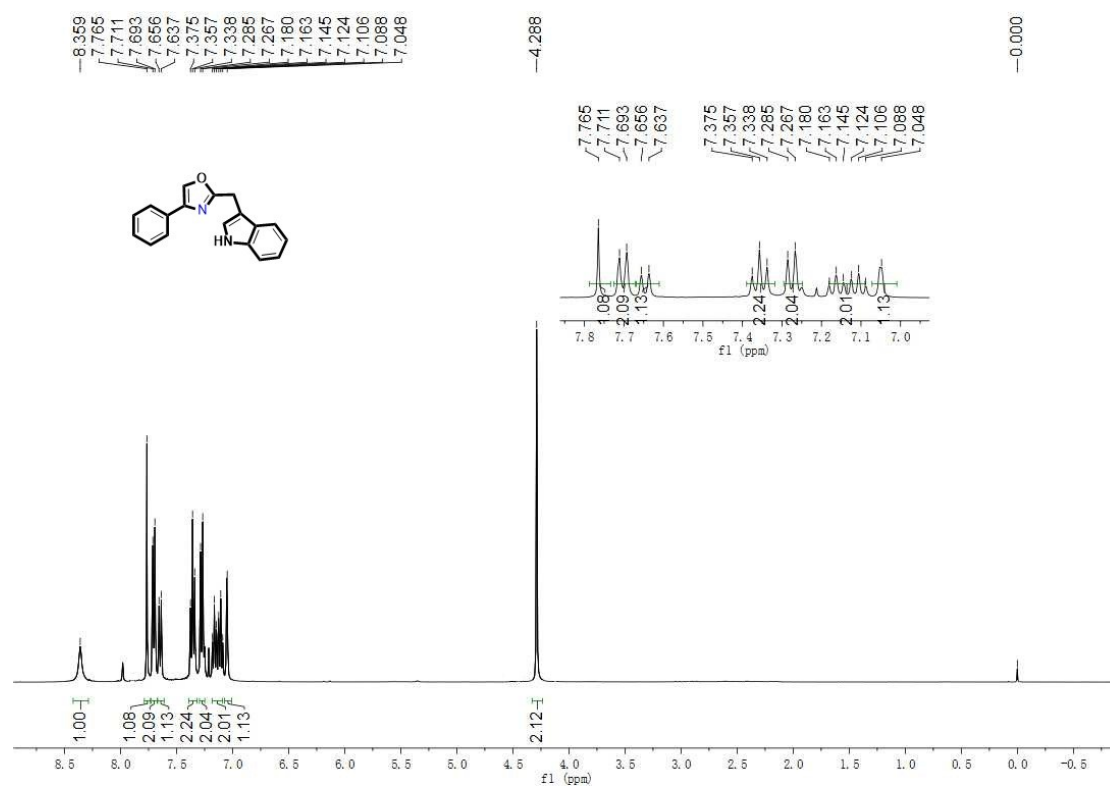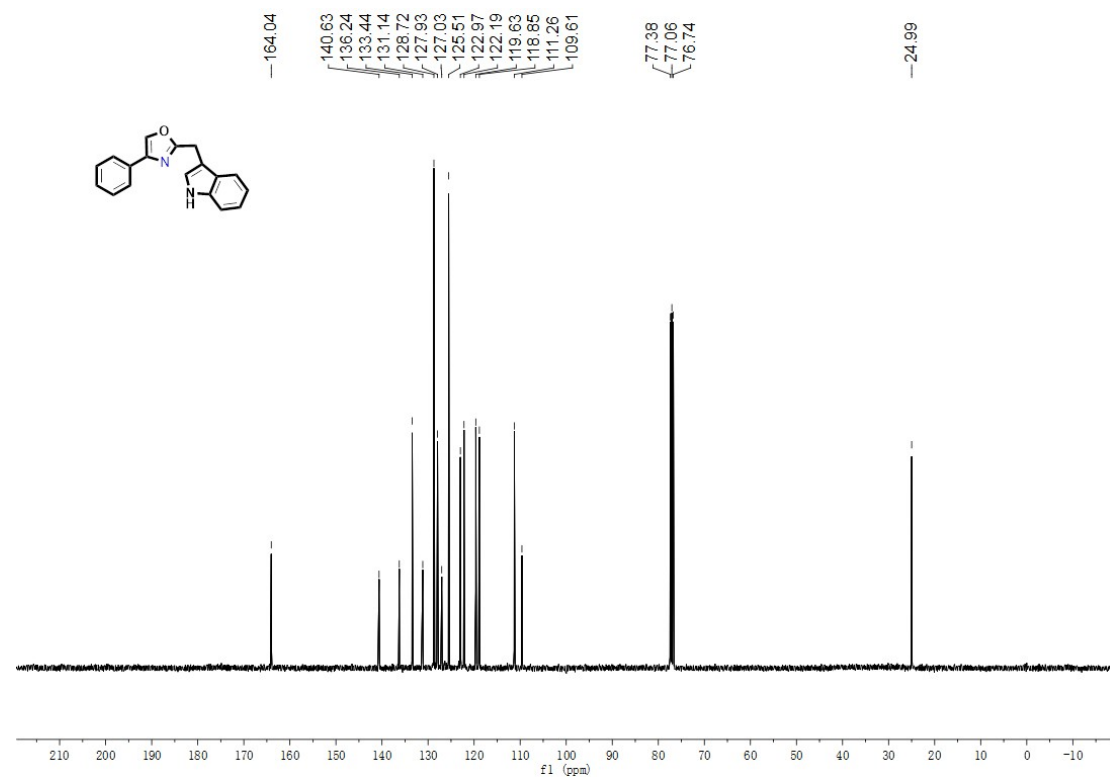

**3p**  $^1\text{H}$  NMR (400 MHz) and  $^{13}\text{C}$  NMR (100 MHz)

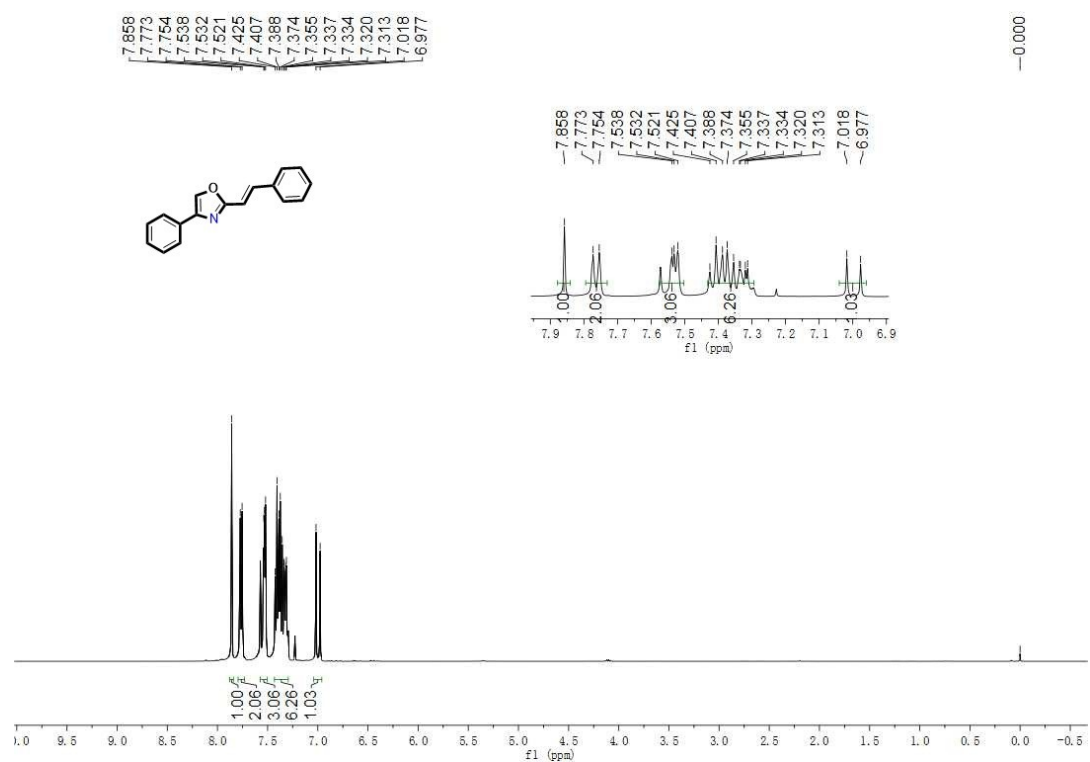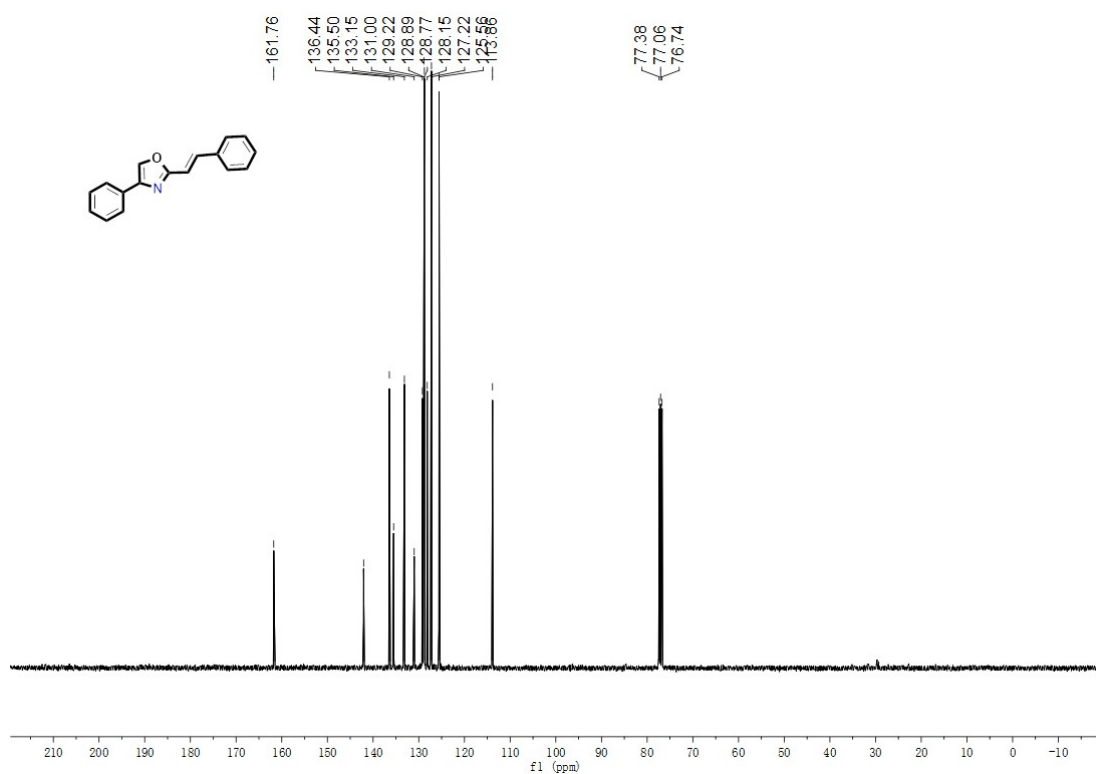



**3q**  $^1\text{H}$  NMR (400 MHz) and  $^{13}\text{C}$  NMR (100 MHz)

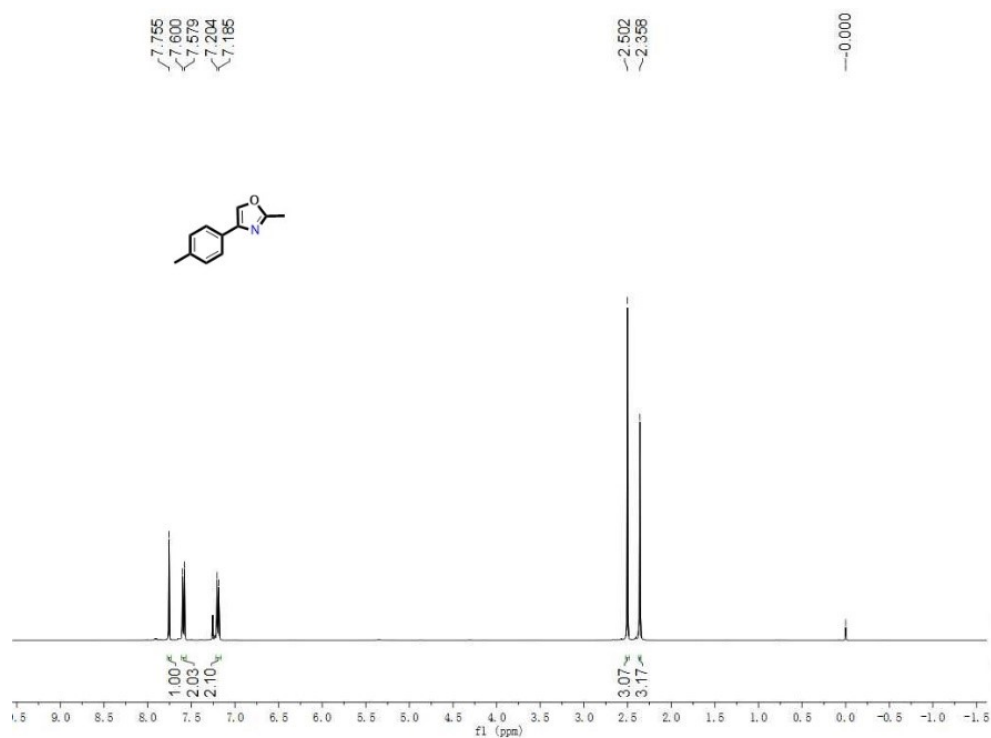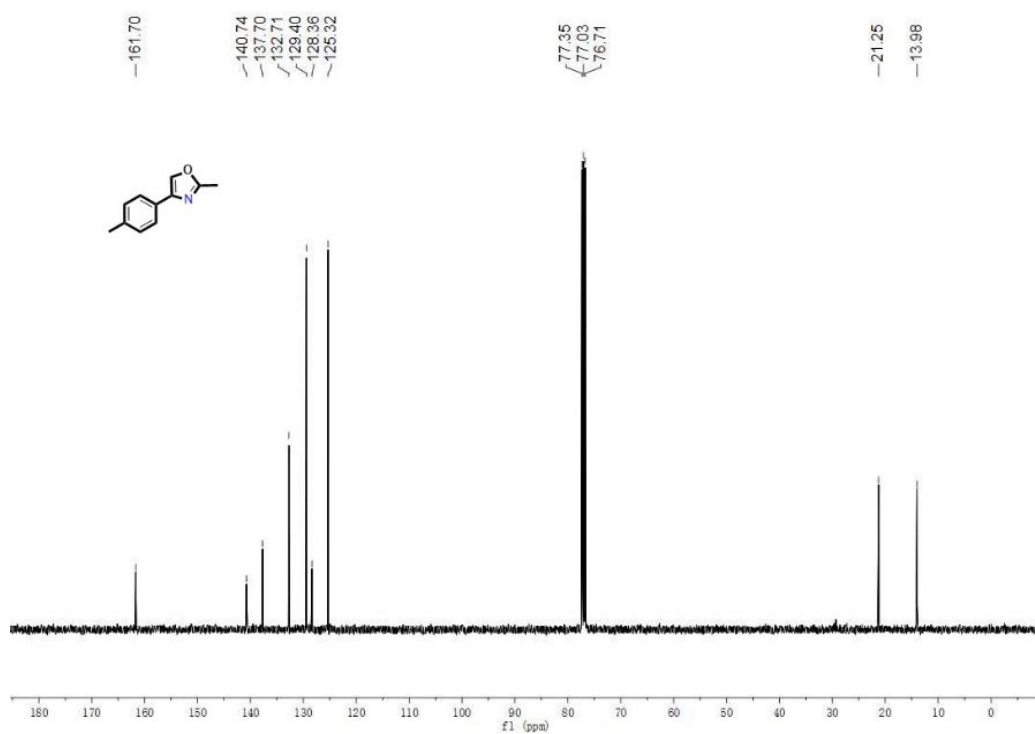

**3r**  $^1\text{H}$  NMR (400 MHz) and  $^{13}\text{C}$  NMR (100 MHz)

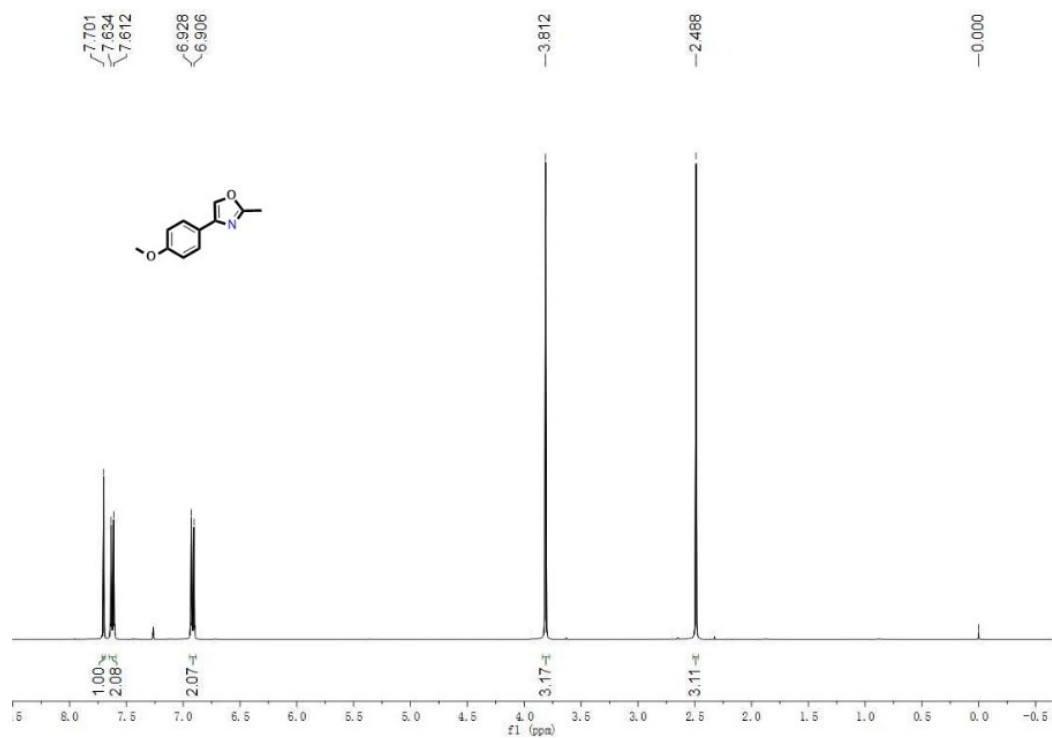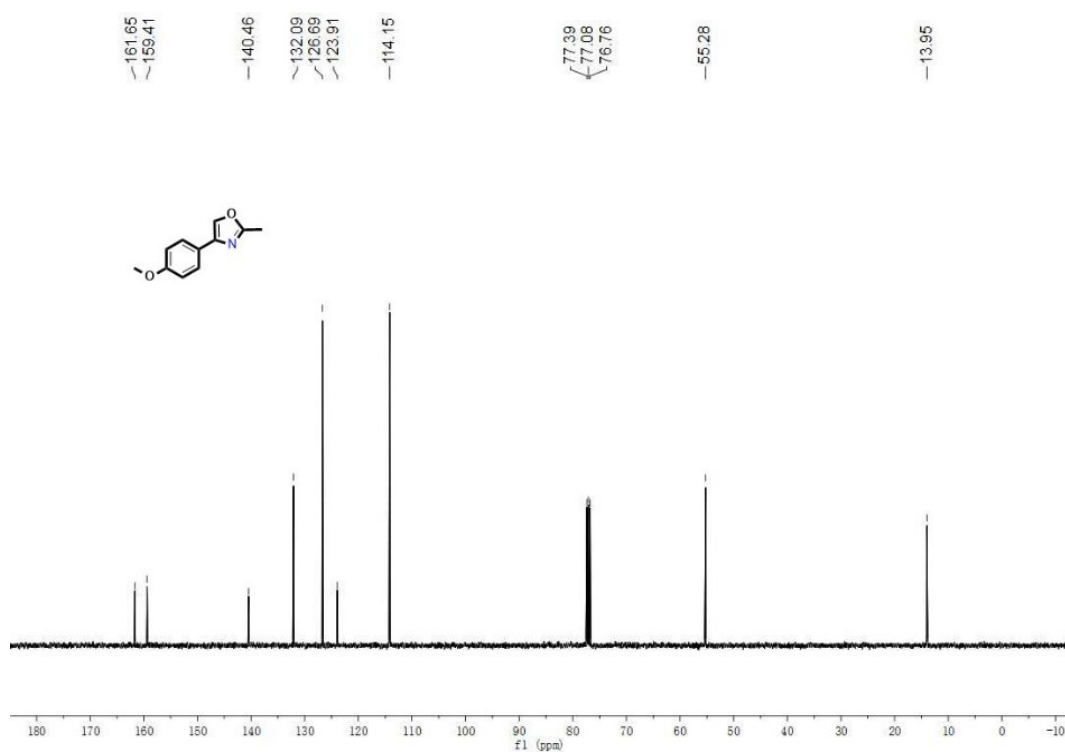

**3s**  $^1\text{H}$  NMR (400 MHz),  $^{19}\text{F}$  NMR (400 MHz) and  $^{13}\text{C}$  NMR (100 MHz)

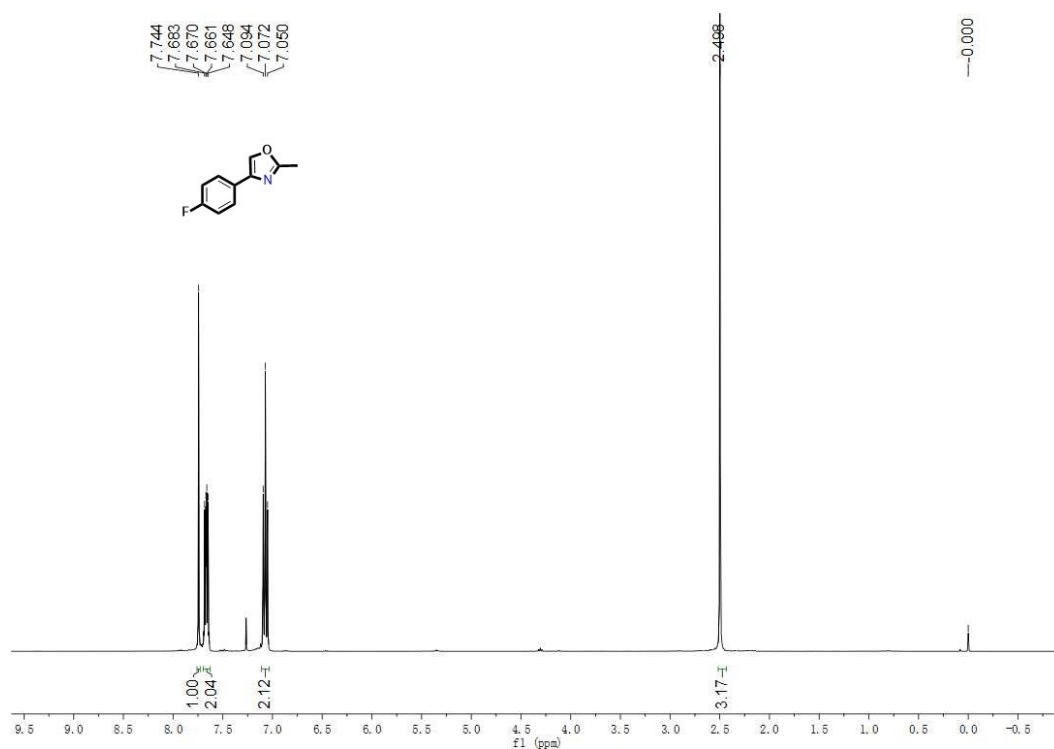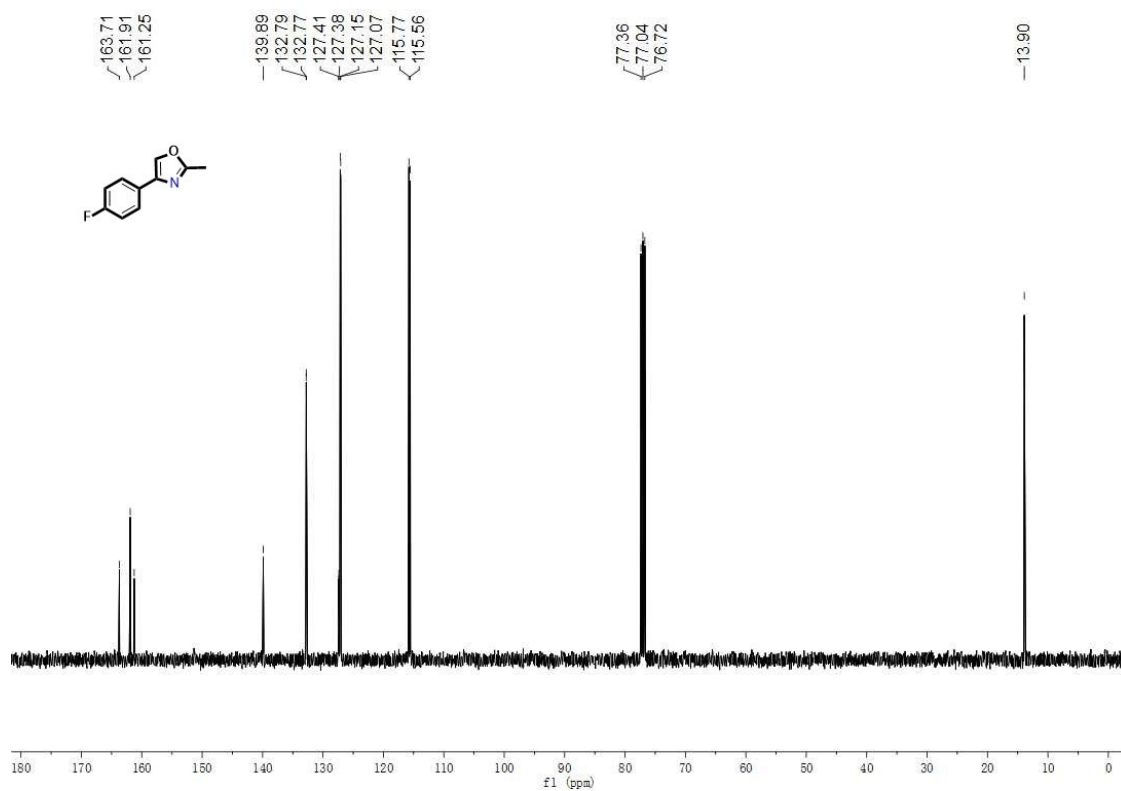

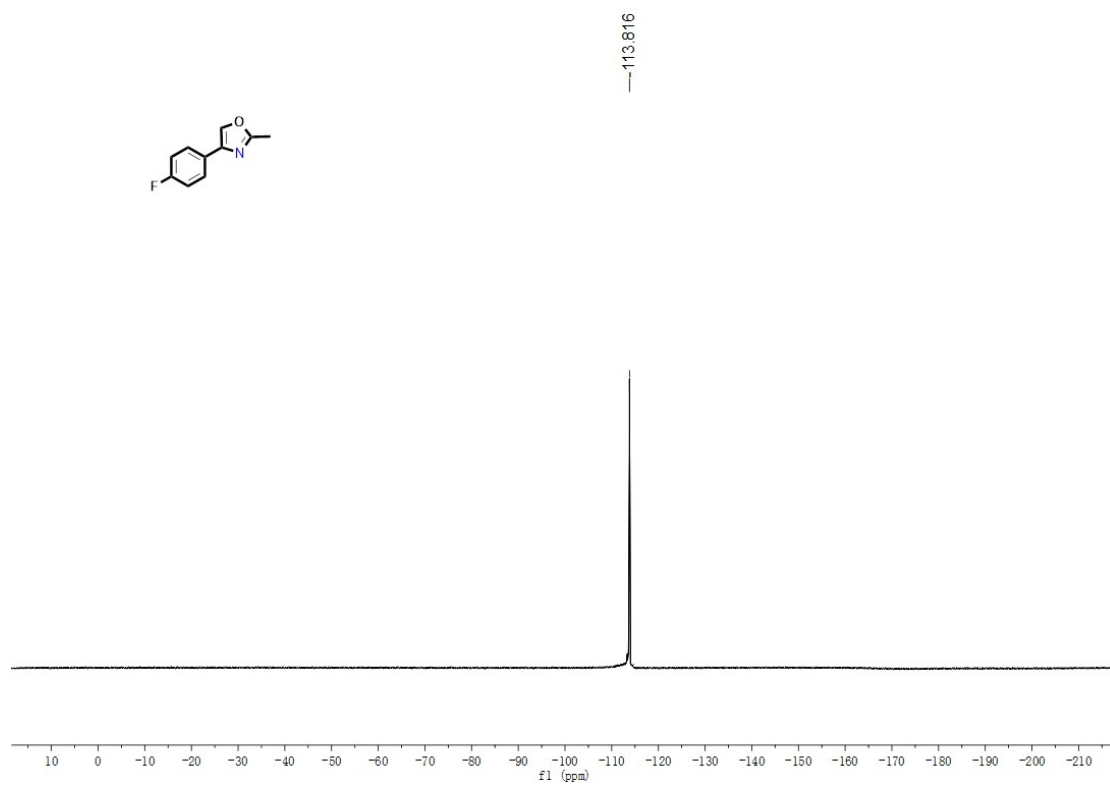

**3t**  $^1\text{H}$  NMR (400 MHz) and  $^{13}\text{C}$  NMR (100 MHz)

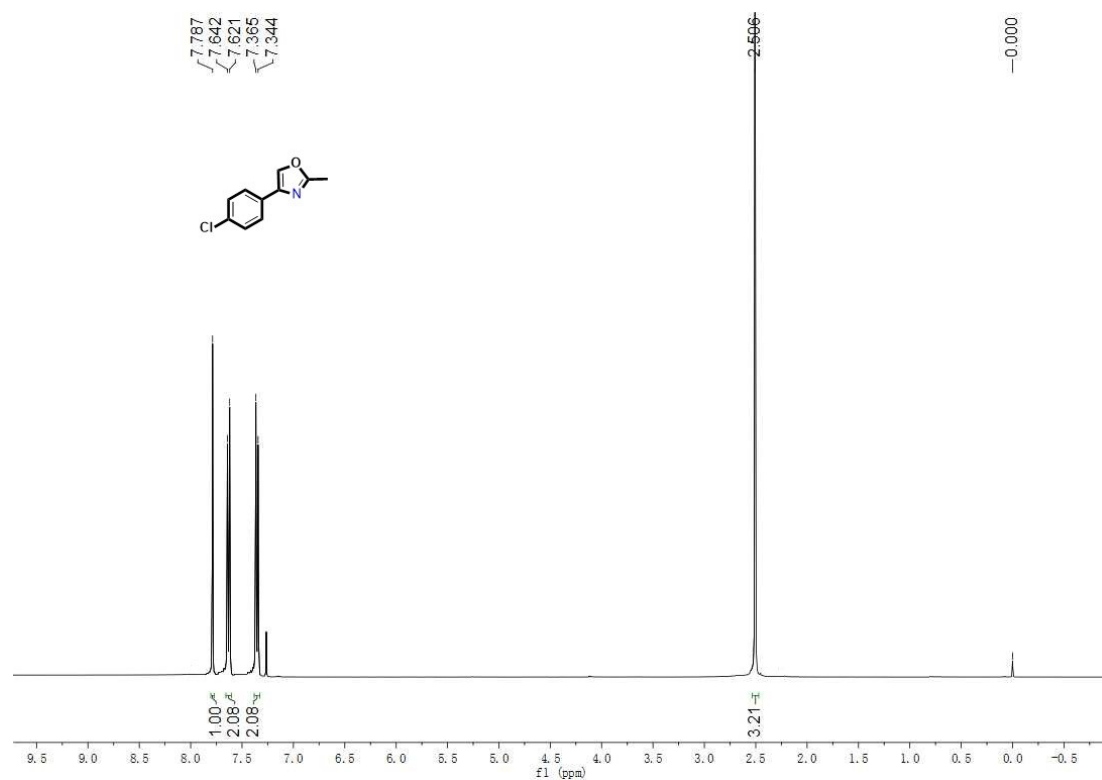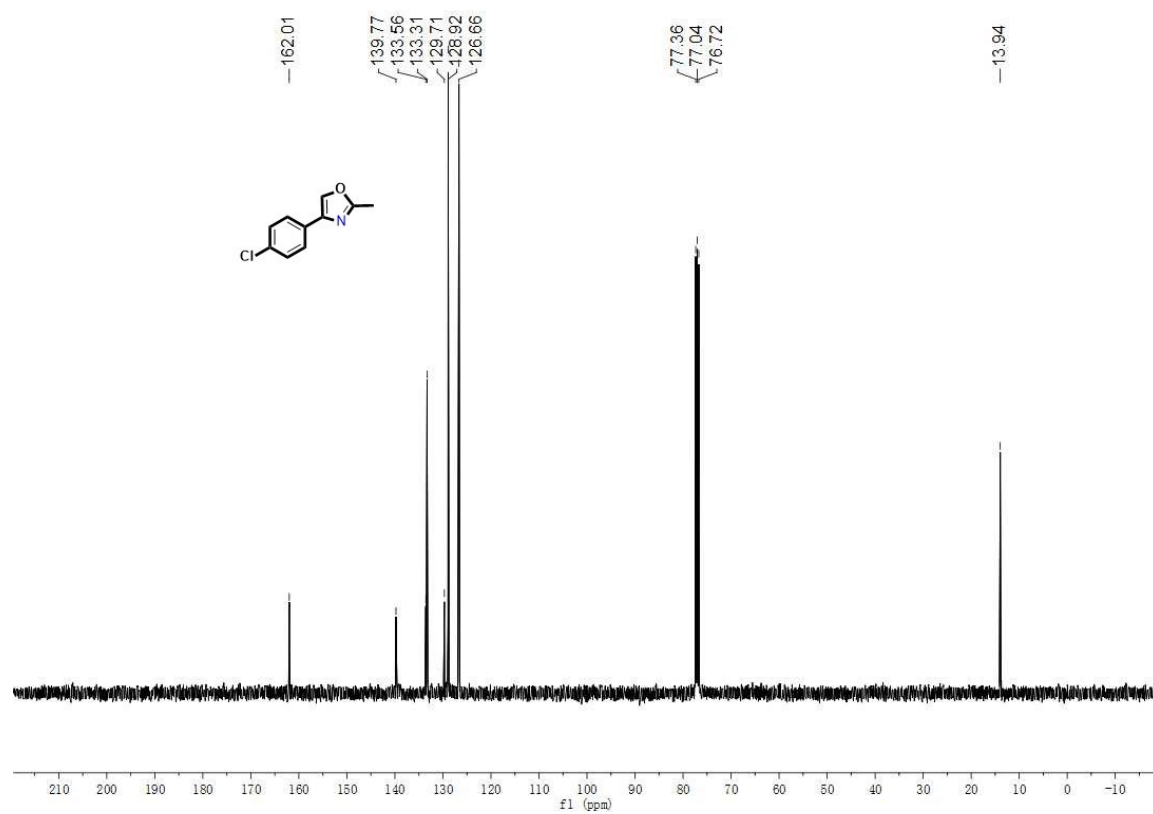

**3u**  $^1\text{H}$  NMR (400 MHz) and  $^{13}\text{C}$  NMR (100 MHz)

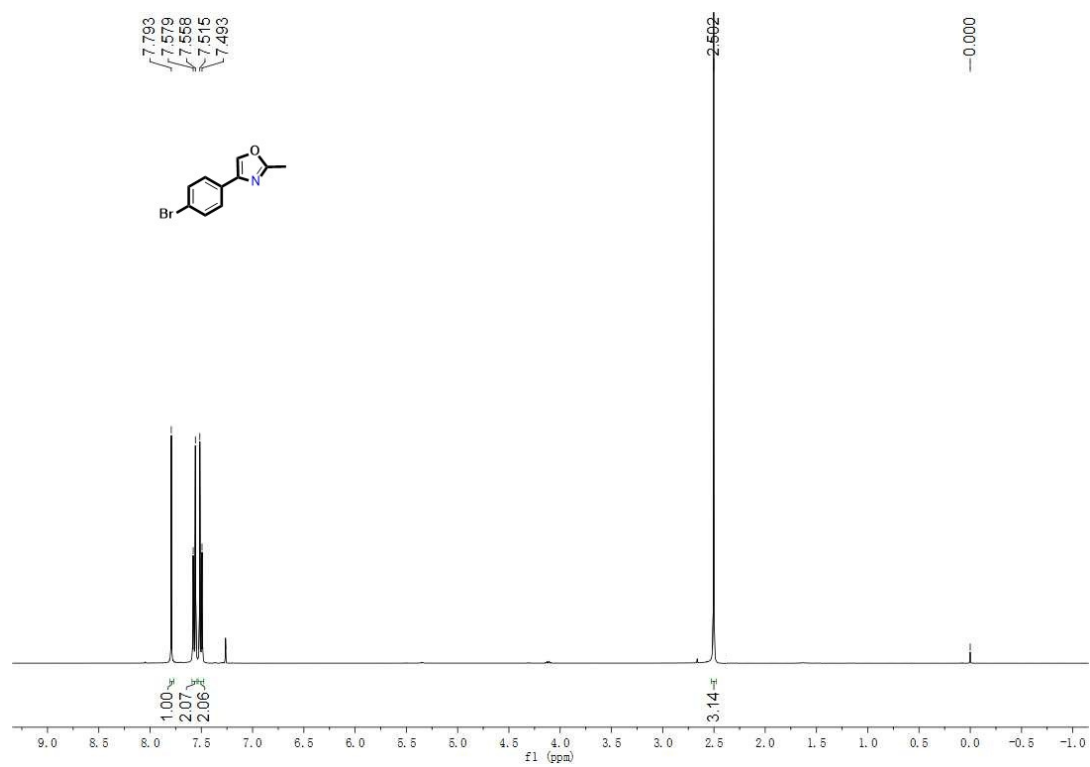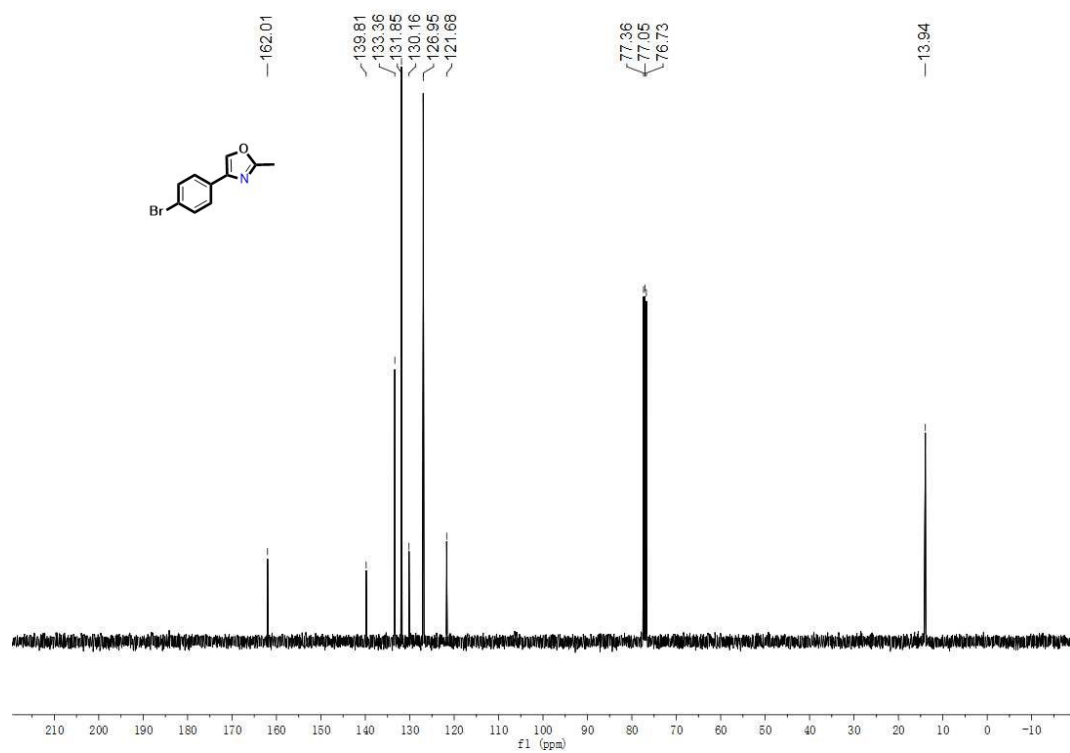

**3v**  $^1\text{H}$  NMR (400 MHz) and  $^{13}\text{C}$  NMR (100 MHz)

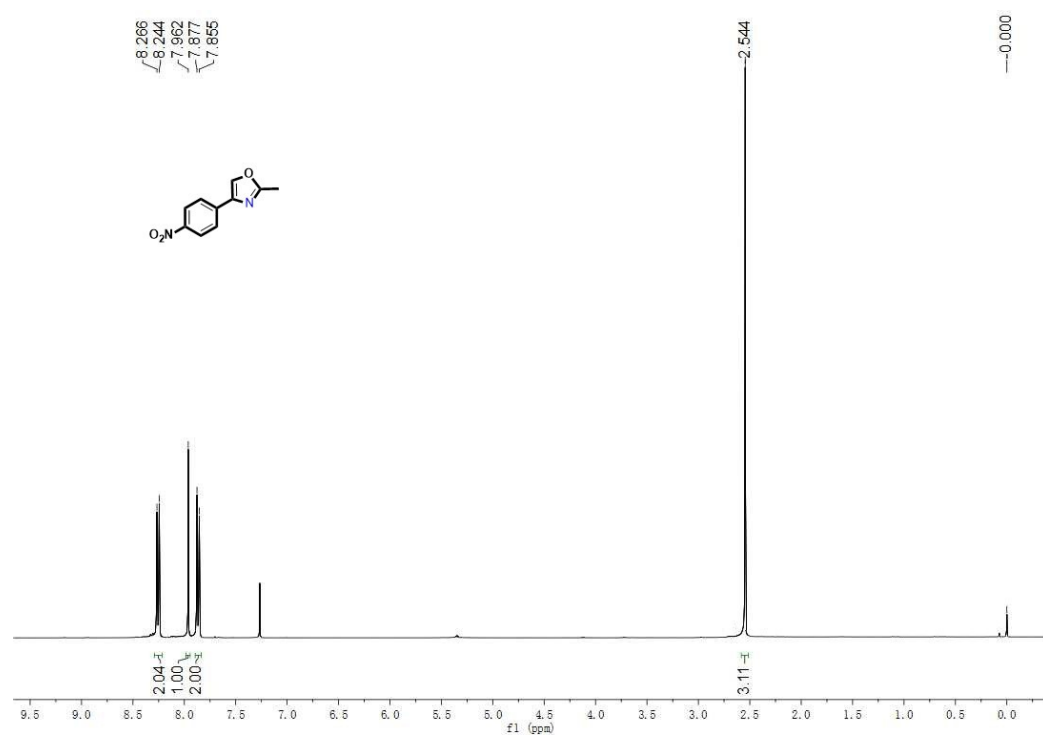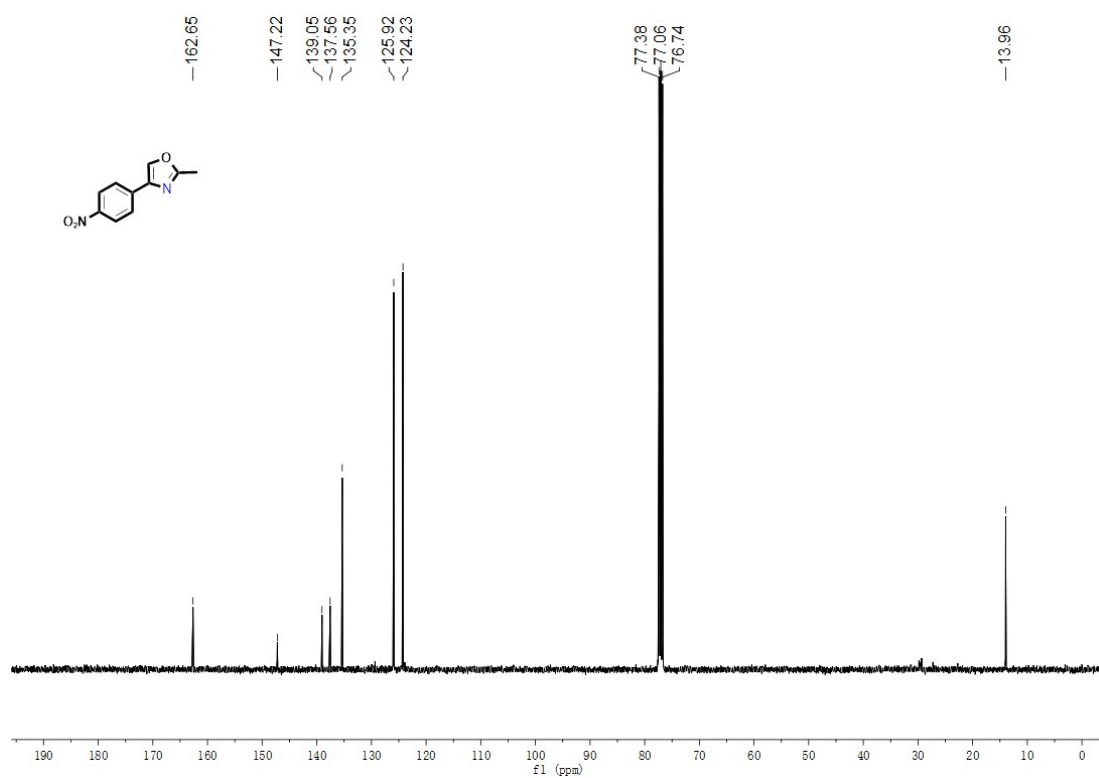

**3w**  $^1\text{H}$  NMR (400 MHz) and  $^{13}\text{C}$  NMR (100 MHz)

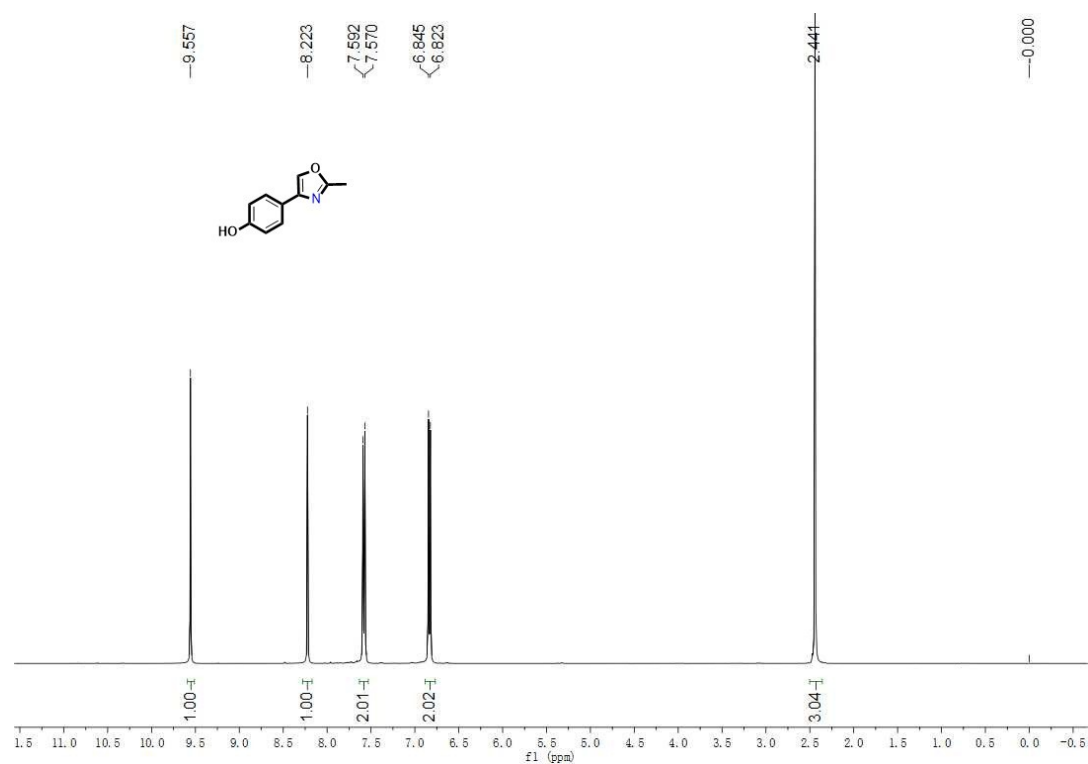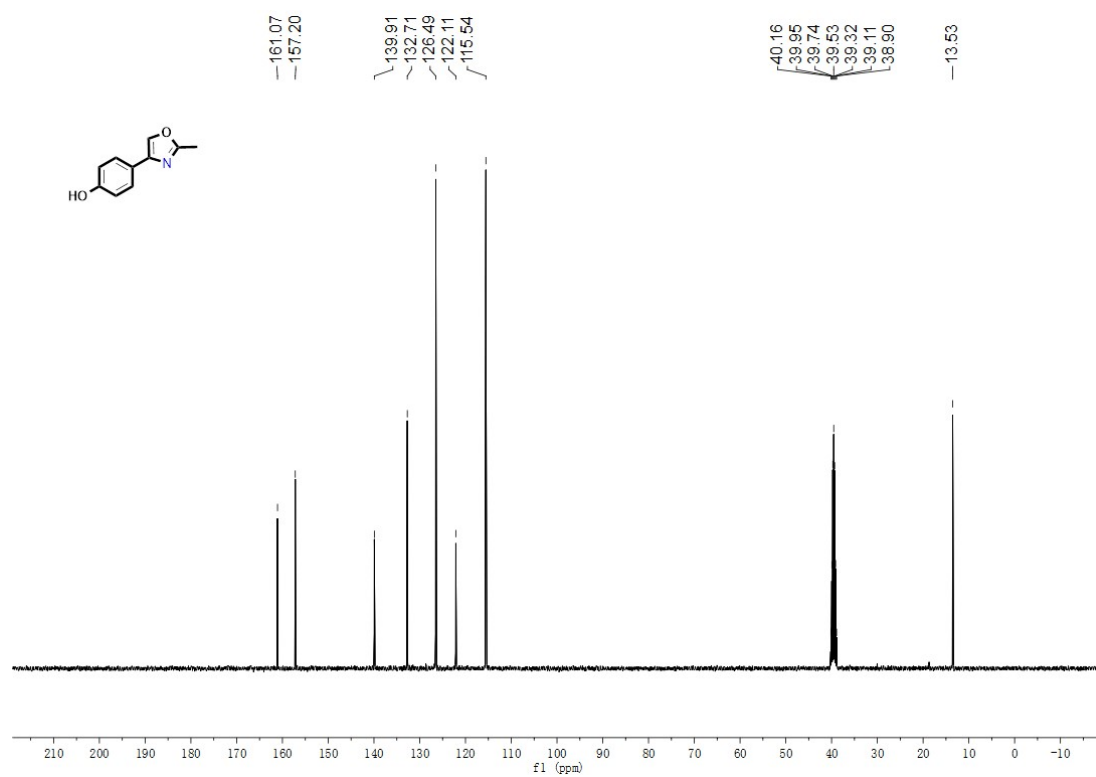



**3x**  $^1\text{H}$  NMR (400 MHz),  $^{19}\text{F}$  NMR (400 MHz) and  $^{13}\text{C}$  NMR (100 MHz)

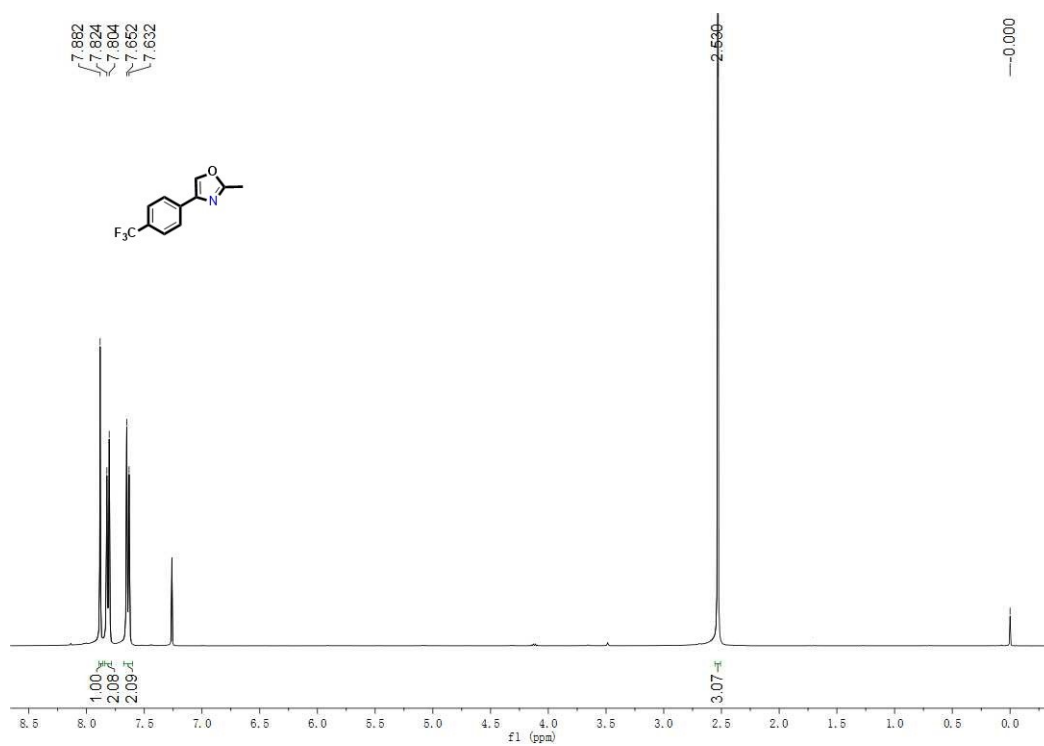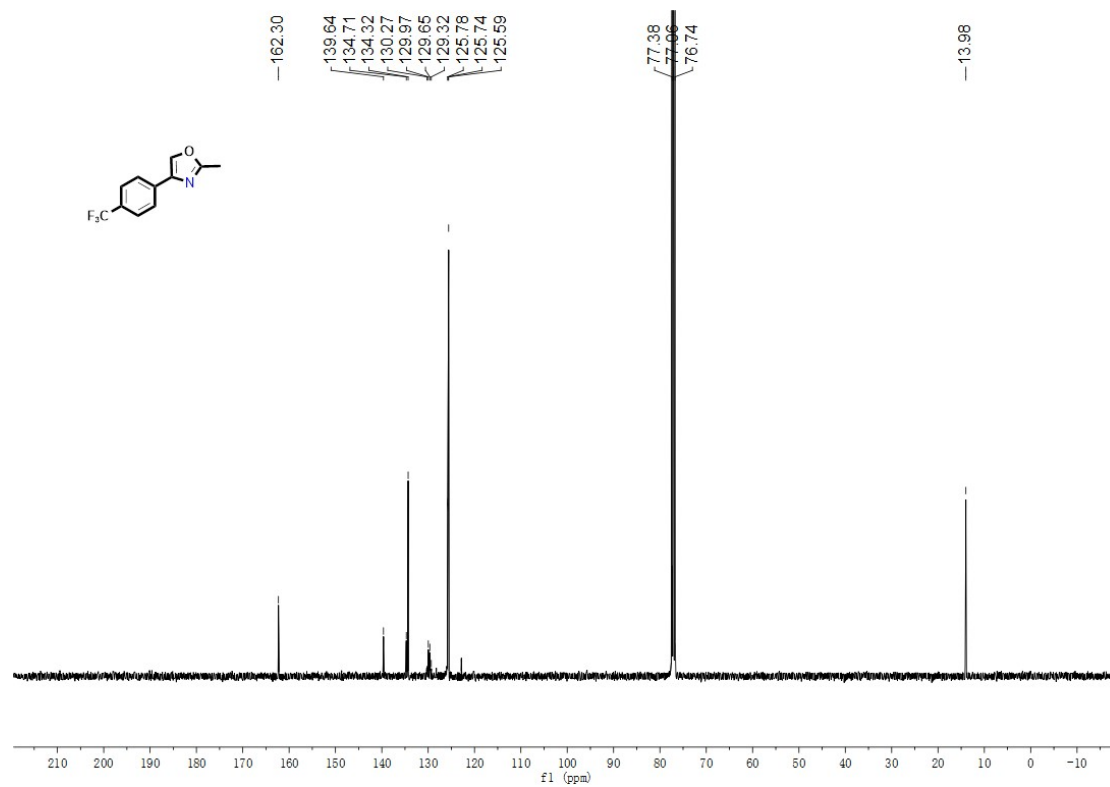

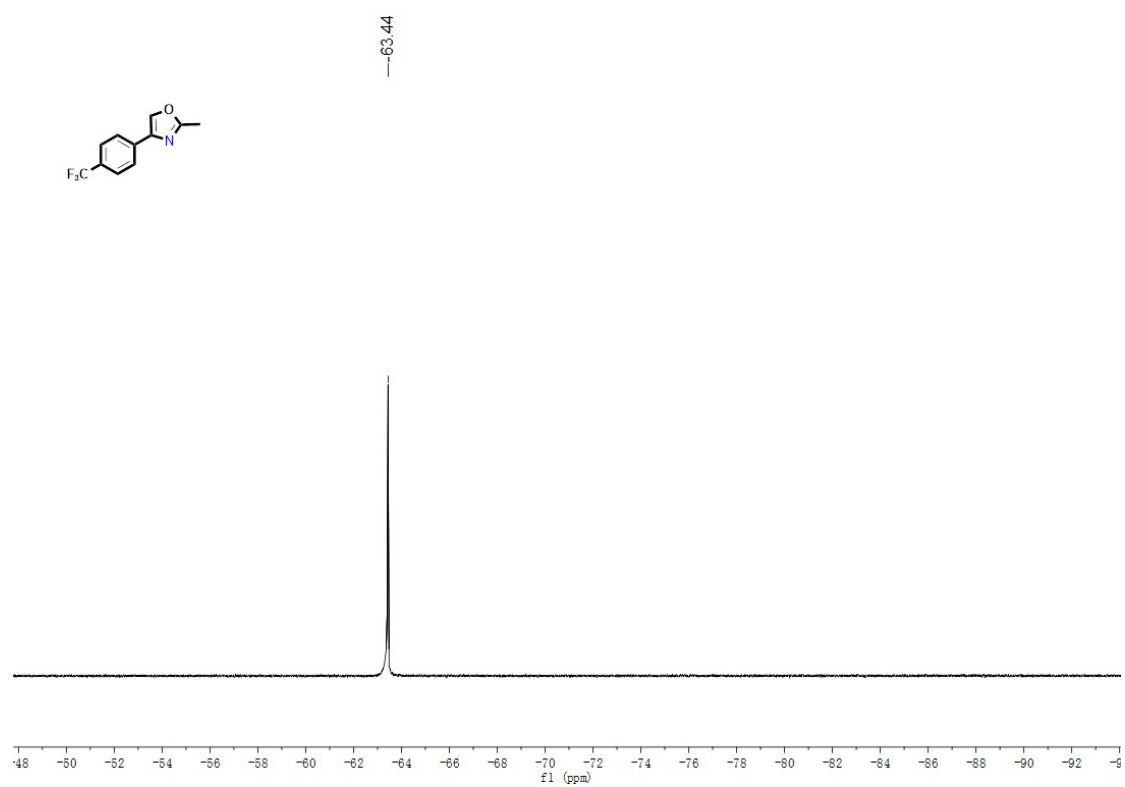

**3y**  $^1\text{H}$  NMR (400 MHz) and  $^{13}\text{C}$  NMR (100 MHz)

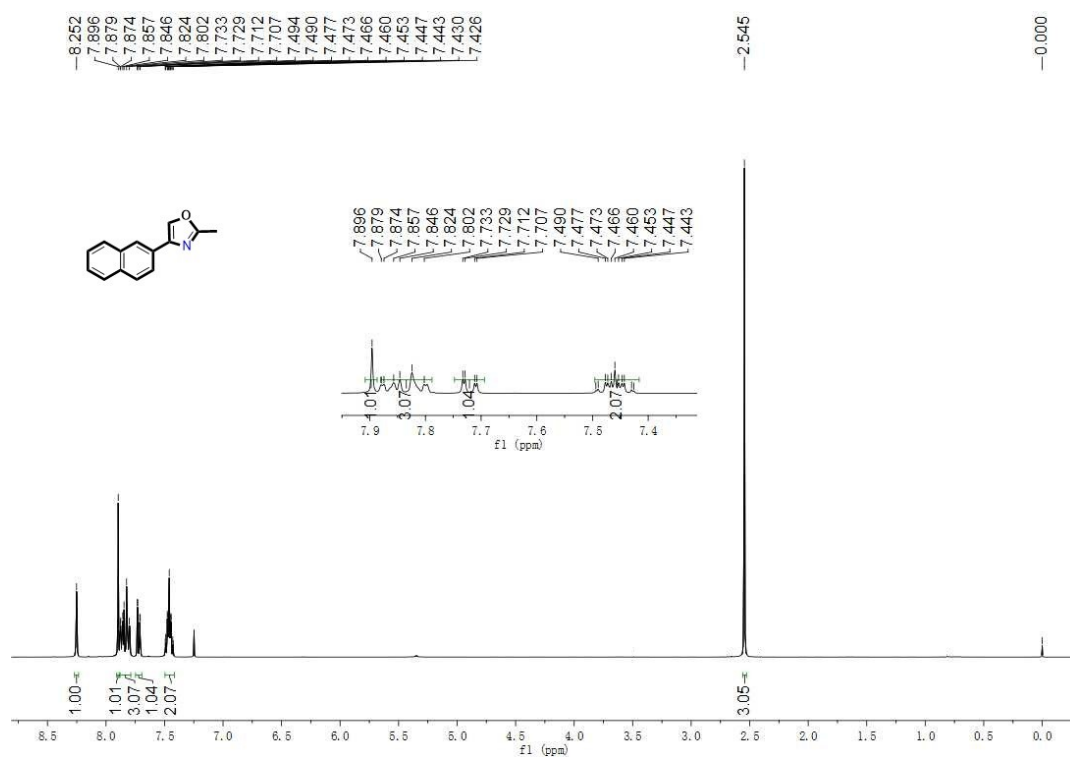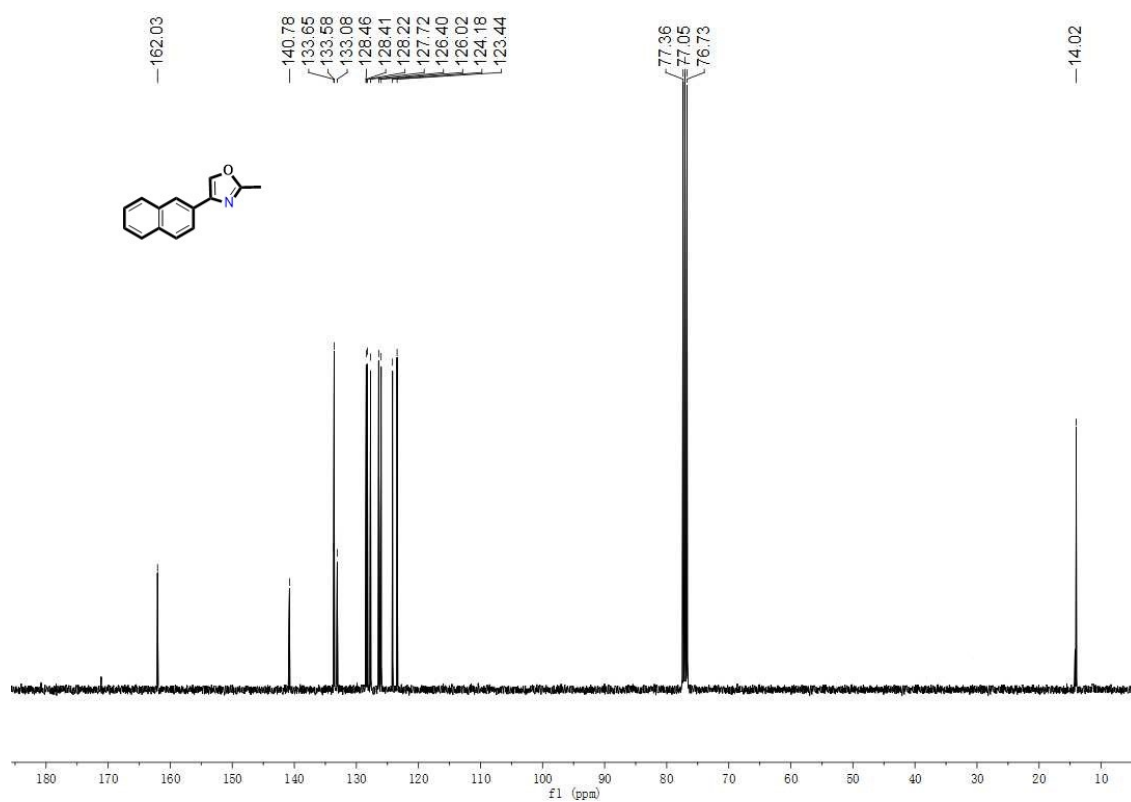

**3z**  $^1\text{H}$  NMR (400 MHz) and  $^{13}\text{C}$  NMR (100 MHz)

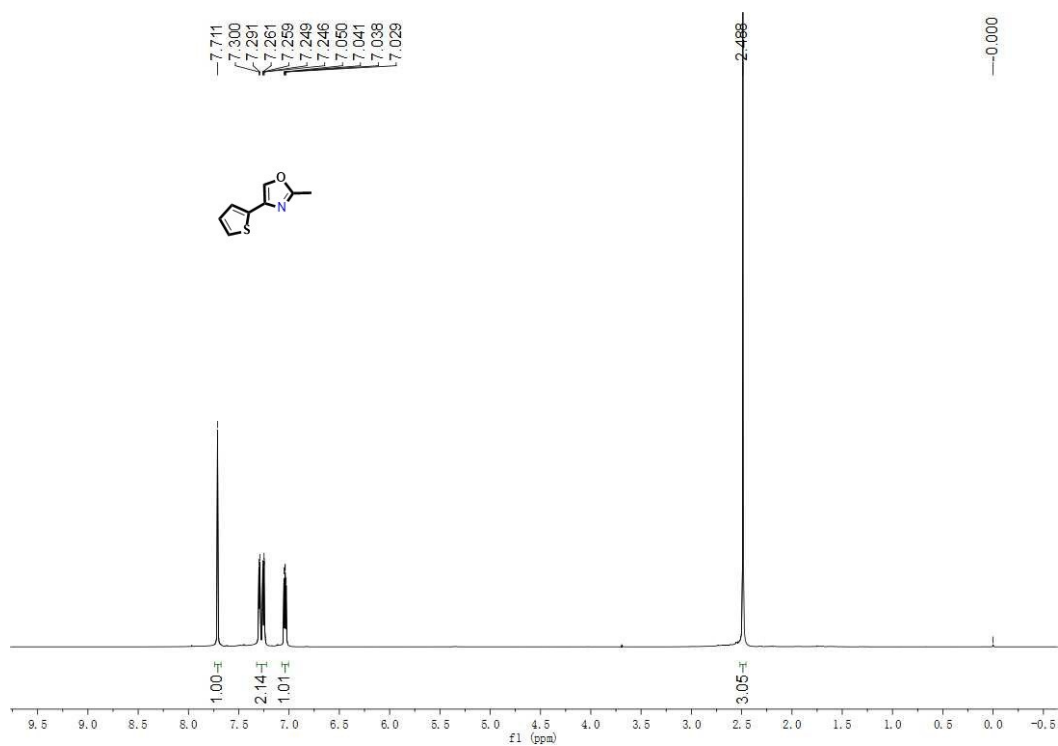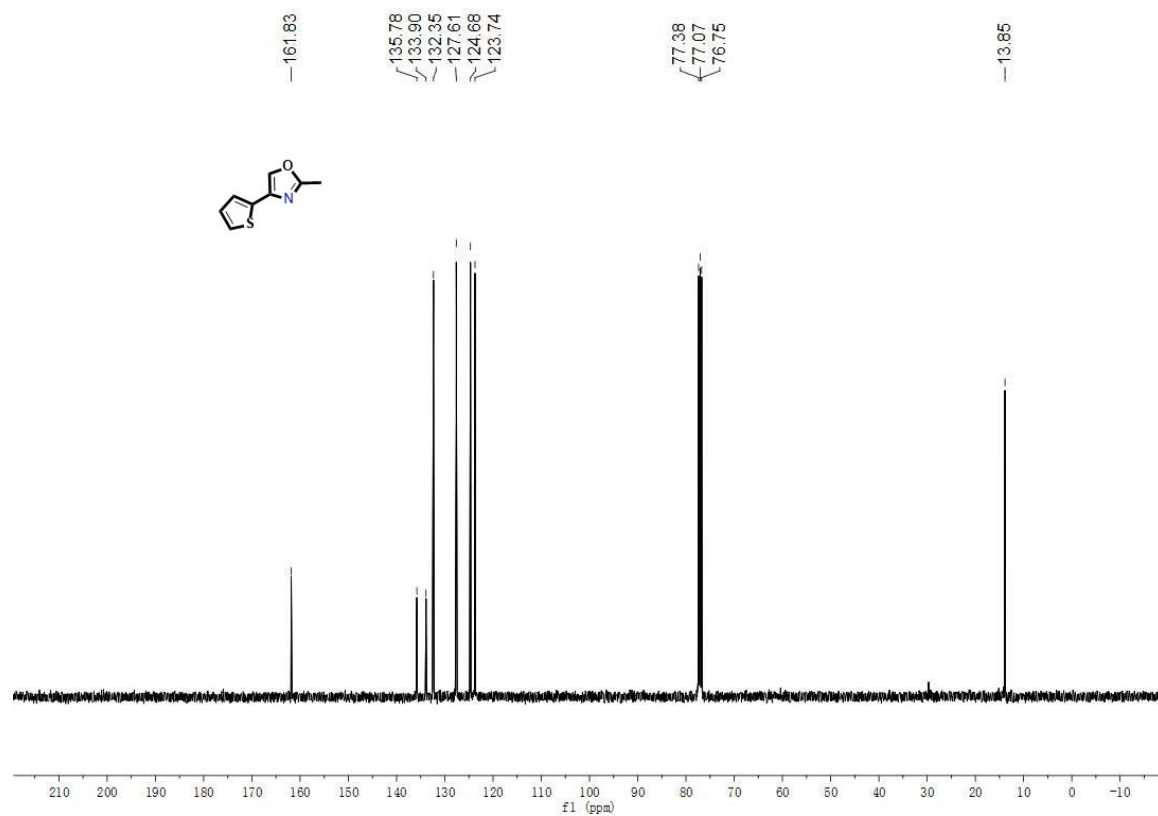

**3z1**  $^1\text{H}$  NMR (400 MHz) and  $^{13}\text{C}$  NMR (100 MHz)

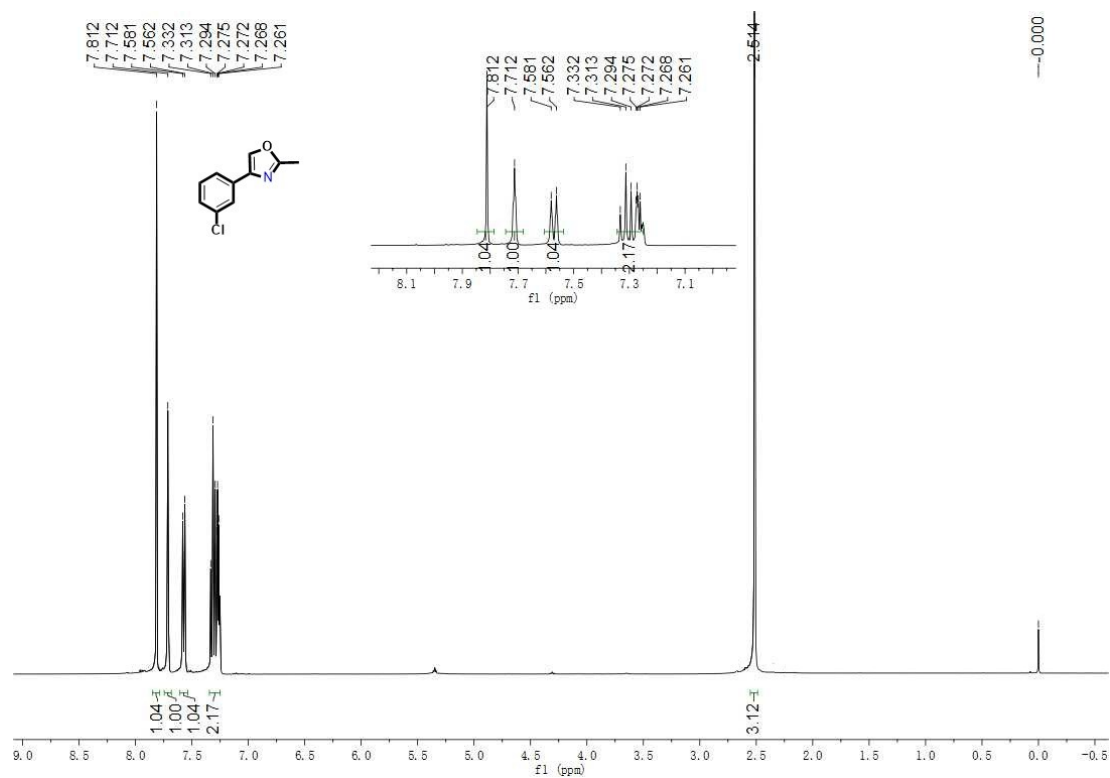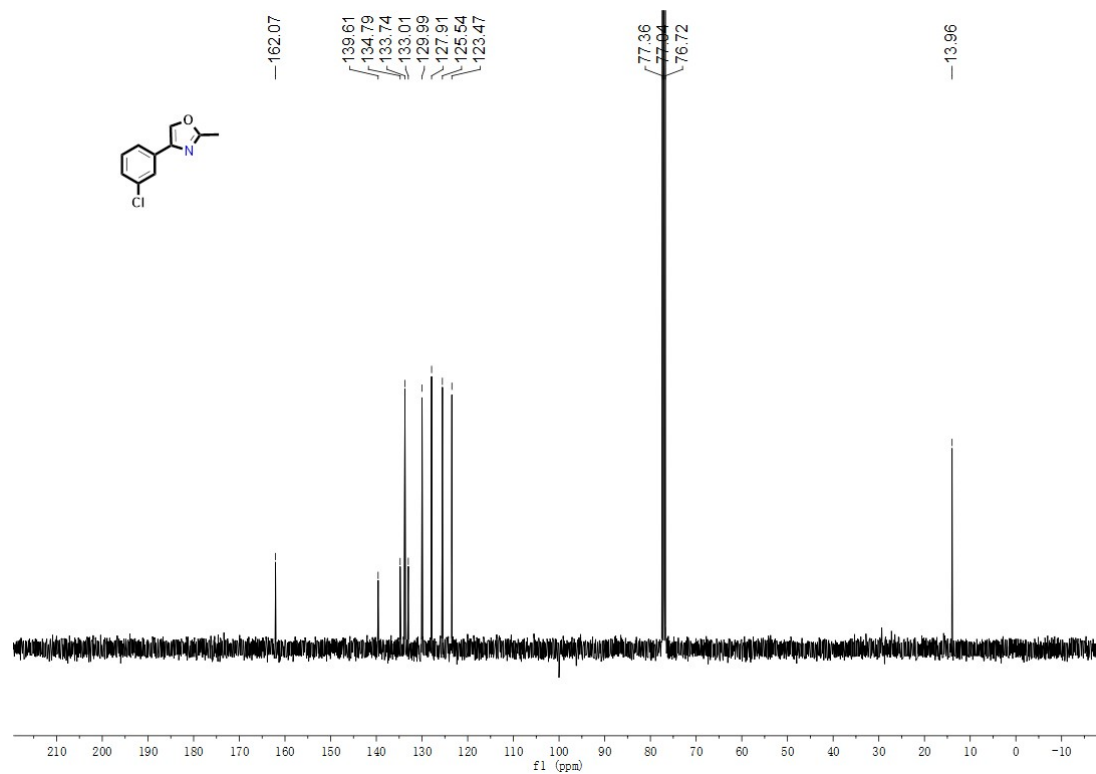

**3z2**  $^1\text{H}$  NMR (400 MHz) and  $^{13}\text{C}$  NMR (100 MHz)

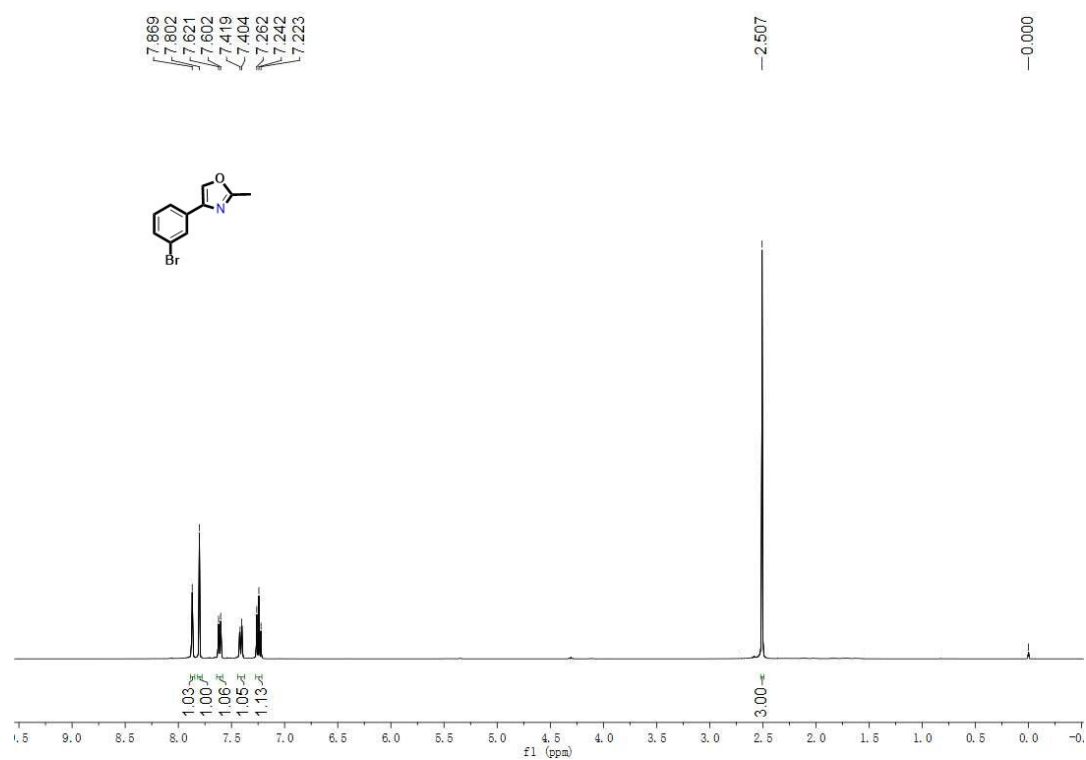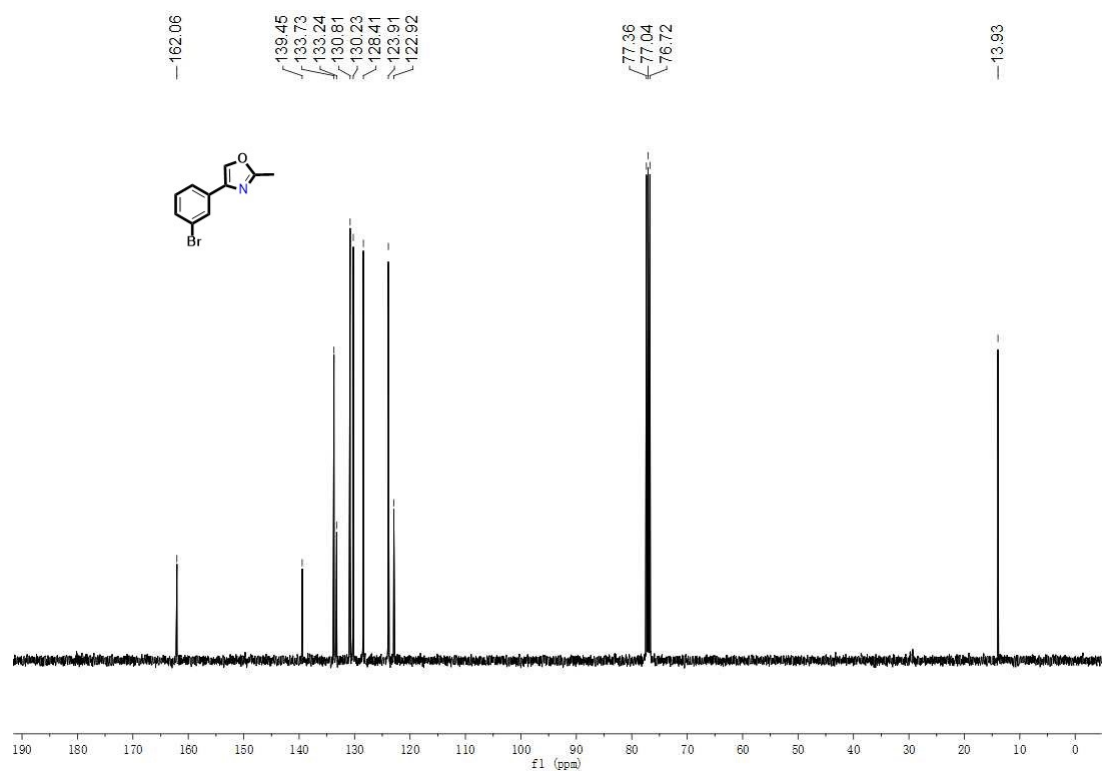

**3z3**  $^1\text{H}$  NMR (400 MHz) and  $^{13}\text{C}$  NMR (100 MHz)

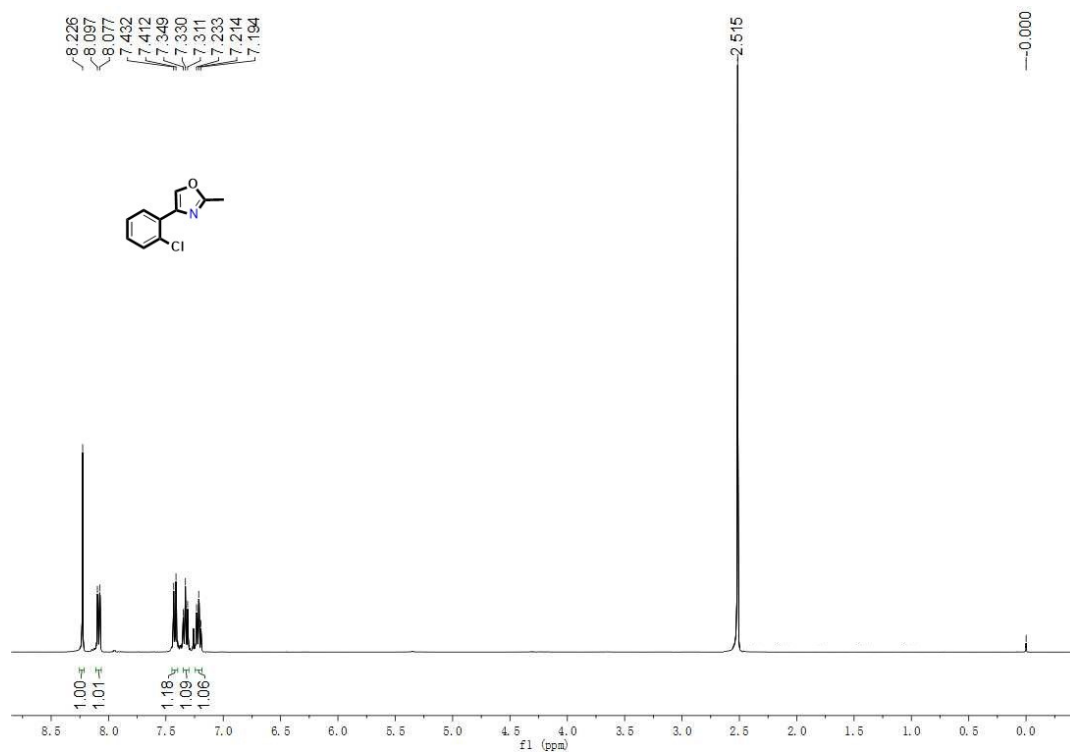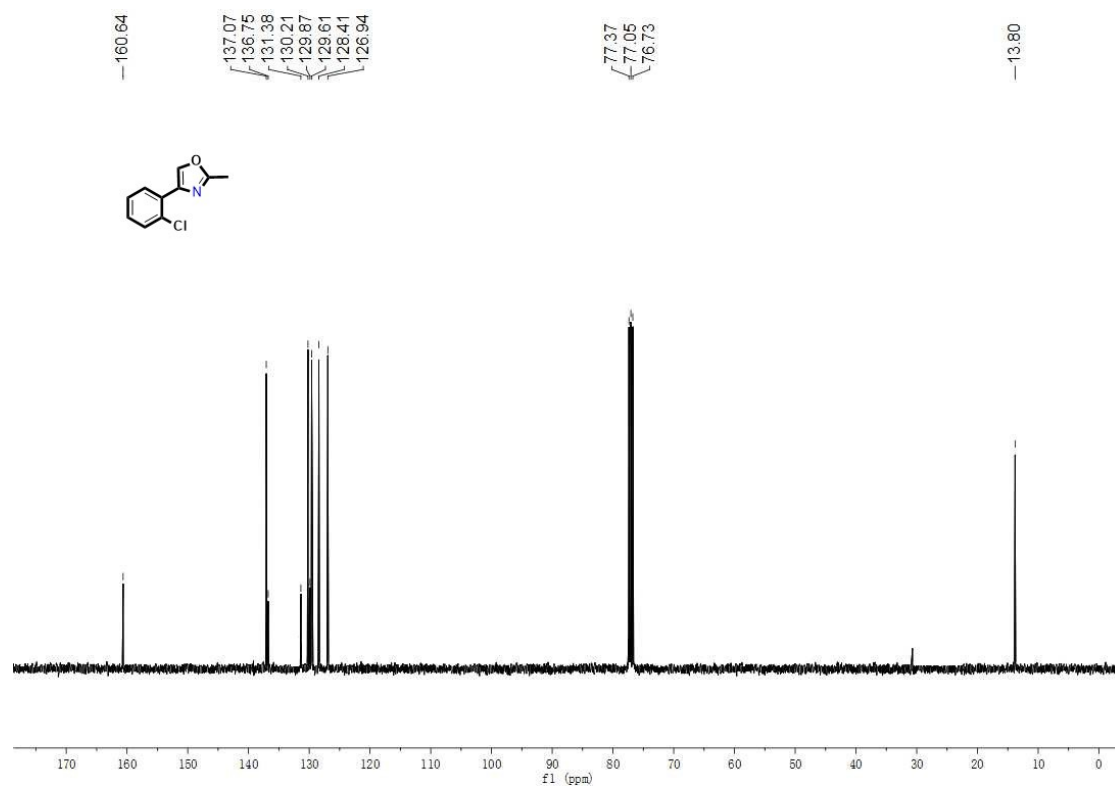

**3z4**  $^1\text{H}$  NMR (400 MHz) and  $^{13}\text{C}$  NMR (100 MHz)

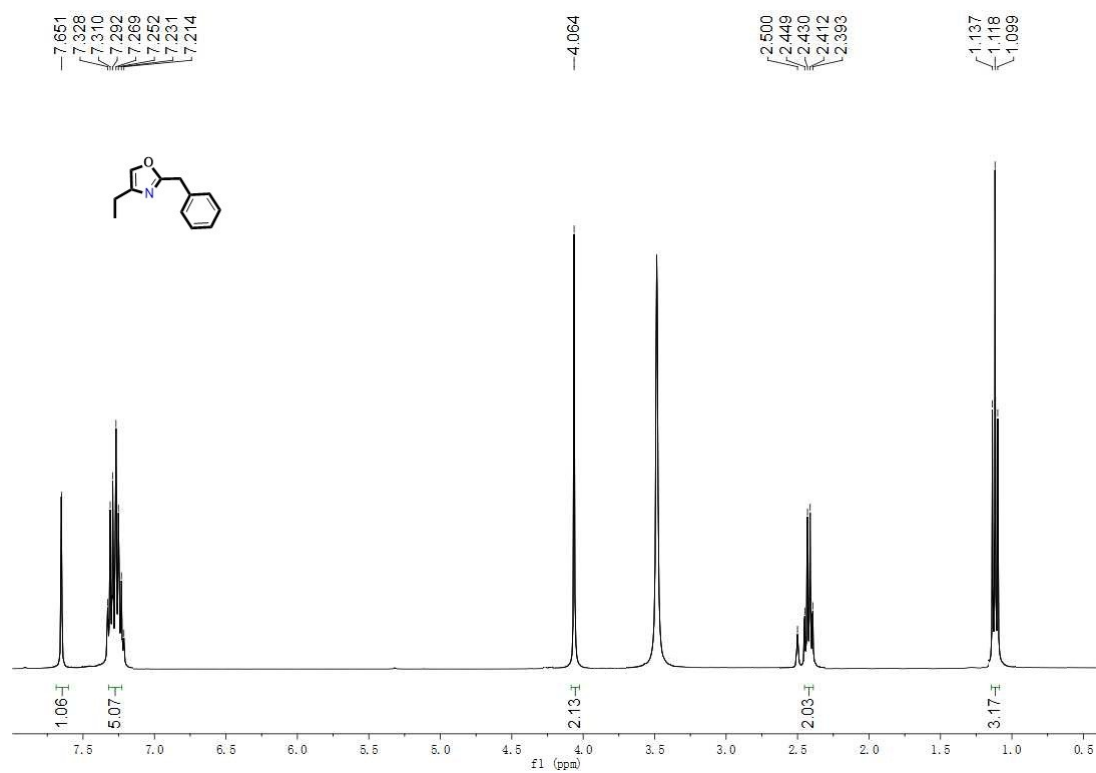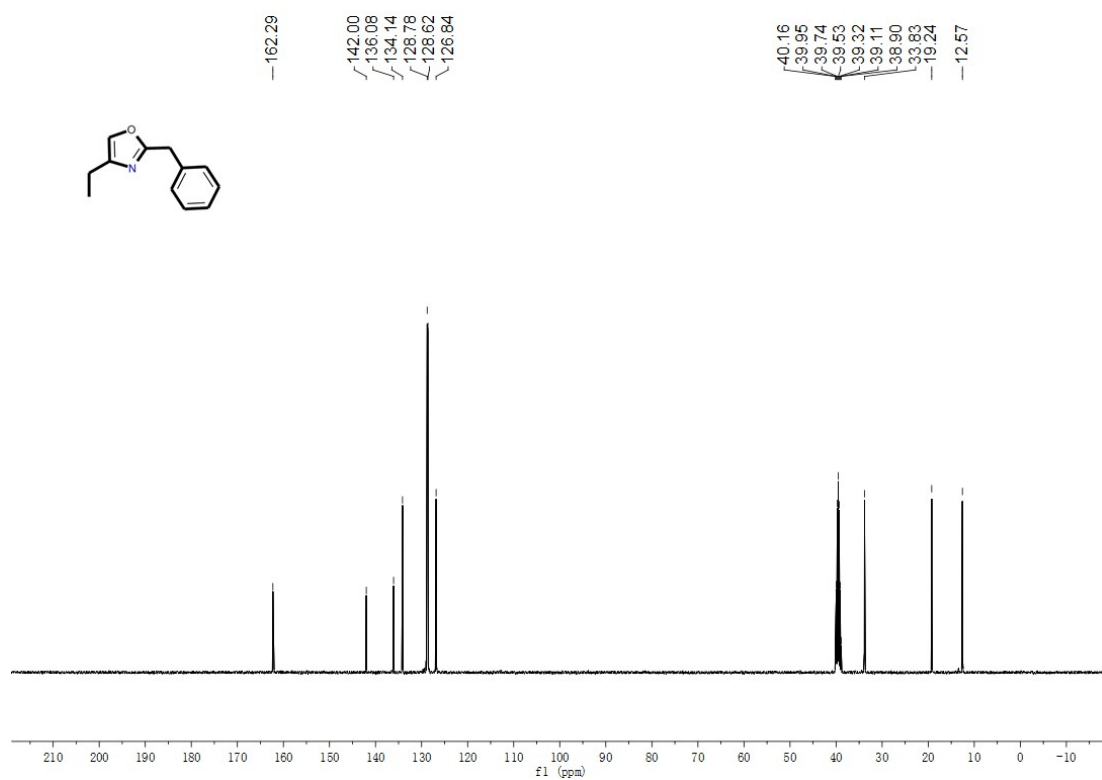

Supplement: d5cc07183f1.pdf [file d5cc07183f1.pdf]
